# Supplementary material for: Detecting potential pleiotropy across cardiovascular and neurological diseases using univariate, bivariate, and multivariate methods on 43,870 individuals from the eMERGE network
Source: PubMed Central journal article supplement — Pac Symp Biocomput. Author manuscript; Available in PMC 2019 Apr 10. (PMC6457436), 2019
Supplement: NIHMS999812-supplement-2.pdf [file NIHMS999812-supplement-2.pdf]

| SNP               | Circulatory description | Nervous                              | NeglogP1                                  | NeglogP2                                                                   | Bivariate_NeglogP | coloc.1     | coloc.2     | eGene       | Tissue      |
|-------------------|-------------------------|--------------------------------------|-------------------------------------------|----------------------------------------------------------------------------|-------------------|-------------|-------------|-------------|-------------|
| 1:36822024        | Cardiac_dysrhythmias    |                                      | Muscular_dystrophies_and_other_myopathies |                                                                            | 11.30548255       | 4.921300364 | 13.24716245 | 0.861283041 | 0.920850775 |
| ENSG00000116883.8 |                         | Adipose_Subcutaneous                 |                                           |                                                                            |                   |             |             |             |             |
| 1:36822024        | Cardiac_dysrhythmias    |                                      | Muscular_dystrophies_and_other_myopathies |                                                                            | 11.30548255       | 4.921300364 | 13.24716245 | 0.863183623 | 0.92119375  |
| ENSG00000116883.8 |                         | Adipose_Visceral_Omentum             |                                           |                                                                            |                   |             |             |             |             |
| 1:36822024        | Cardiac_dysrhythmias    |                                      | Muscular_dystrophies_and_other_myopathies |                                                                            | 11.30548255       | 4.921300364 | 13.24716245 | 0.861887094 | 0.920938571 |
| ENSG00000116883.8 |                         | Adrenal_Gland                        |                                           |                                                                            |                   |             |             |             |             |
| 1:36822024        | Cardiac_dysrhythmias    |                                      | Muscular_dystrophies_and_other_myopathies |                                                                            | 11.30548255       | 4.921300364 | 13.24716245 | 0.86249238  | 0.920999584 |
| ENSG00000116883.8 |                         | Artery_Aorta                         |                                           |                                                                            |                   |             |             |             |             |
| 1:36822024        | Cardiac_dysrhythmias    |                                      | Muscular_dystrophies_and_other_myopathies |                                                                            | 11.30548255       | 4.921300364 | 13.24716245 | 0.861221993 | 0.920841474 |
| ENSG00000116883.8 |                         | Artery_Tibial                        |                                           |                                                                            |                   |             |             |             |             |
| 1:36822024        | Cardiac_dysrhythmias    |                                      | Muscular_dystrophies_and_other_myopathies |                                                                            | 11.30548255       | 4.921300364 | 13.24716245 | 0.86146861  | 0.920869003 |
| ENSG00000116883.8 |                         | Brain_Anterior_cingulate_cortex_BA24 |                                           |                                                                            |                   |             |             |             |             |
| 1:36822024        | Cardiac_dysrhythmias    |                                      | Muscular_dystrophies_and_other_myopathies |                                                                            | 11.30548255       | 4.921300364 | 13.24716245 | 0.897909934 | 0.927191334 |
| ENSG00000116883.8 |                         | Brain_Caudate_basal_ganglia          |                                           |                                                                            |                   |             |             |             |             |
| 1:36822024        | Cardiac_dysrhythmias    |                                      | Muscular_dystrophies_and_other_myopathies |                                                                            | 11.30548255       | 4.921300364 | 13.24716245 | 0.917491096 | 0.931081949 |
| ENSG00000116883.8 |                         | Brain_Cerebellar_Hemisphere          |                                           |                                                                            |                   |             |             |             |             |
| 1:36822024        | Cardiac_dysrhythmias    |                                      | Muscular_dystrophies_and_other_myopathies |                                                                            | 11.30548255       | 4.921300364 | 13.24716245 | 0.861218662 | 0.920841975 |
| ENSG00000116883.8 |                         | Brain_Cerebellum                     |                                           |                                                                            |                   |             |             |             |             |
| 1:36822024        | Cardiac_dysrhythmias    |                                      | Muscular_dystrophies_and_other_myopathies |                                                                            | 11.30548255       | 4.921300364 | 13.24716245 | 0.864549795 | 0.921176787 |
| ENSG00000116883.8 |                         | Brain_Cortex                         |                                           |                                                                            |                   |             |             |             |             |
| 1:36822024        | Cardiac_dysrhythmias    |                                      | Muscular_dystrophies_and_other_myopathies |                                                                            | 11.30548255       | 4.921300364 | 13.24716245 | 0.907989552 | 0.931036204 |
| ENSG00000116883.8 |                         | Brain_Frontal_Cortex_BA9             |                                           |                                                                            |                   |             |             |             |             |
| 1:36822024        | Cardiac_dysrhythmias    |                                      | Muscular_dystrophies_and_other_myopathies |                                                                            | 11.30548255       | 4.921300364 | 13.24716245 | 0.865168722 | 0.921507273 |
| ENSG00000116883.8 |                         | Brain_Hippocampus                    |                                           |                                                                            |                   |             |             |             |             |
| 1:36822024        | Cardiac_dysrhythmias    |                                      | Muscular_dystrophies_and_other_myopathies |                                                                            | 11.30548255       | 4.921300364 | 13.24716245 | 0.879602954 | 0.923590672 |
| ENSG00000116883.8 |                         | Breast_Mammary_Tissue                |                                           |                                                                            |                   |             |             |             |             |
| 1:36822024        | Cardiac_dysrhythmias    |                                      | Muscular_dystrophies_and_other_myopathies |                                                                            | 11.30548255       | 4.921300364 | 13.24716245 | 0.861223348 | 0.920840627 |
| ENSG00000116883.8 |                         | Cells_EBV-transformed_lymphocytes    |                                           |                                                                            |                   |             |             |             |             |
| 1:36822024        | Cardiac_dysrhythmias    |                                      | Muscular_dystrophies_and_other_myopathies |                                                                            | 11.30548255       | 4.921300364 | 13.24716245 | 0.861210573 | 0.920838726 |
| ENSG00000116883.8 |                         | Cells_Transformed_fibroblasts        |                                           |                                                                            |                   |             |             |             |             |
| 1:36822024        | Cardiac_dysrhythmias    |                                      | Muscular_dystrophies_and_other_myopathies |                                                                            | 11.30548255       | 4.921300364 | 13.24716245 | 0.942797102 | 0.935620748 |
| ENSG00000142694.6 |                         | Colon_Sigmoid                        | EVA1B                                     | eva-1 homolog B [Source:HGNC Symbol;Acc:HGNC:25558]                        |                   |             |             |             |             |
| 1:36822024        | Cardiac_dysrhythmias    |                                      | Muscular_dystrophies_and_other_myopathies |                                                                            | 11.30548255       | 4.921300364 | 13.24716245 | 0.862228593 | 0.921044387 |
| ENSG00000116883.8 |                         | Colon_Transverse                     |                                           |                                                                            |                   |             |             |             |             |
| 1:36822024        | Cardiac_dysrhythmias    |                                      | Muscular_dystrophies_and_other_myopathies |                                                                            | 11.30548255       | 4.921300364 | 13.24716245 | 0.893110156 | 0.930131318 |
| ENSG00000116883.8 |                         | Esophagus_Gastroesophageal_Junction  |                                           |                                                                            |                   |             |             |             |             |
| 1:36822024        | Cardiac_dysrhythmias    |                                      | Muscular_dystrophies_and_other_myopathies |                                                                            | 11.30548255       | 4.921300364 | 13.24716245 | 0.861210556 | 0.920838731 |
| ENSG00000116883.8 |                         | Esophagus_Mucosa                     |                                           |                                                                            |                   |             |             |             |             |
| 1:36822024        | Cardiac_dysrhythmias    |                                      | Muscular_dystrophies_and_other_myopathies |                                                                            | 11.30548255       | 4.921300364 | 13.24716245 | 0.862310404 | 0.920873651 |
| ENSG00000142694.6 |                         | Esophagus_Muscularis                 | EVA1B                                     | eva-1 homolog B [Source:HGNC Symbol;Acc:HGNC:25558]                        |                   |             |             |             |             |
| 1:36822024        | Cardiac_dysrhythmias    |                                      | Muscular_dystrophies_and_other_myopathies |                                                                            | 11.30548255       | 4.921300364 | 13.24716245 | 0.861210571 | 0.920838734 |
| ENSG00000116883.8 |                         | Heart_Atrial_Appendage               |                                           |                                                                            |                   |             |             |             |             |
| 1:36822024        | Cardiac_dysrhythmias    |                                      | Muscular_dystrophies_and_other_myopathies |                                                                            | 11.30548255       | 4.921300364 | 13.24716245 | 0.861216989 | 0.920839701 |
| ENSG00000116883.8 |                         | Heart_Left_Ventricle                 |                                           |                                                                            |                   |             |             |             |             |
| 1:36822024        | Cardiac_dysrhythmias    |                                      | Muscular_dystrophies_and_other_myopathies |                                                                            | 11.30548255       | 4.921300364 | 13.24716245 | 0.861210559 | 0.920838731 |
| ENSG00000116883.8 |                         | Lung                                 |                                           |                                                                            |                   |             |             |             |             |
| 1:36822024        | Cardiac_dysrhythmias    |                                      | Muscular_dystrophies_and_other_myopathies |                                                                            | 11.30548255       | 4.921300364 | 13.24716245 | 0.937448099 | 0.940270926 |
| ENSG00000054116.7 |                         | Muscle_Skeletal                      | TRAPPC3                                   | trafficking protein particle complex 3 [Source:HGNC Symbol;Acc:HGNC:19942] |                   |             |             |             |             |
| 1:36822024        | Cardiac_dysrhythmias    |                                      | Muscular_dystrophies_and_other_myopathies |                                                                            | 11.30548255       | 4.921300364 | 13.24716245 | 0.861211148 | 0.92083881  |
| ENSG00000116883.8 |                         | Nerve_Tibial                         |                                           |                                                                            |                   |             |             |             |             |

|                   |                                      |                                                     |             |             |             |             |             |
|-------------------|--------------------------------------|-----------------------------------------------------|-------------|-------------|-------------|-------------|-------------|
| 1:36822024        | Cardiac_dysrhythmias                 | Muscular_dystrophies_and_other_myopathies           | 11.30548255 | 4.921300364 | 13.24716245 | 0.886746137 | 0.920239785 |
| ENSG00000116883.8 | Pancreas                             |                                                     |             |             |             |             |             |
| 1:36822024        | Cardiac_dysrhythmias                 | Muscular_dystrophies_and_other_myopathies           | 11.30548255 | 4.921300364 | 13.24716245 | 0.861729724 | 0.920872258 |
| ENSG00000116883.8 | Pituitary                            |                                                     |             |             |             |             |             |
| 1:36822024        | Cardiac_dysrhythmias                 | Muscular_dystrophies_and_other_myopathies           | 11.30548255 | 4.921300364 | 13.24716245 | 0.861214598 | 0.920838708 |
| ENSG00000116883.8 | Skin_Not_Sun_Exposed_Suprapubic      |                                                     |             |             |             |             |             |
| 1:36822024        | Cardiac_dysrhythmias                 | Muscular_dystrophies_and_other_myopathies           | 11.30548255 | 4.921300364 | 13.24716245 | 0.861210562 | 0.920838732 |
| ENSG00000116883.8 | Skin_Sun_Exposed_Lower_leg           |                                                     |             |             |             |             |             |
| 1:36822024        | Cardiac_dysrhythmias                 | Muscular_dystrophies_and_other_myopathies           | 11.30548255 | 4.921300364 | 13.24716245 | 0.923029605 | 0.929423492 |
| ENSG00000116883.8 | Small_Intestine_Terminal_Ileum       |                                                     |             |             |             |             |             |
| 1:36822024        | Cardiac_dysrhythmias                 | Muscular_dystrophies_and_other_myopathies           | 11.30548255 | 4.921300364 | 13.24716245 | 0.871564171 | 0.922205276 |
| ENSG00000116883.8 | Spleen                               |                                                     |             |             |             |             |             |
| 1:36822024        | Cardiac_dysrhythmias                 | Muscular_dystrophies_and_other_myopathies           | 11.30548255 | 4.921300364 | 13.24716245 | 0.864413778 | 0.921144174 |
| ENSG00000116883.8 | Stomach                              |                                                     |             |             |             |             |             |
| 1:36822024        | Cardiac_dysrhythmias                 | Muscular_dystrophies_and_other_myopathies           | 11.30548255 | 4.921300364 | 13.24716245 | 0.863126358 | 0.92195204  |
| ENSG00000116883.8 | Testis                               |                                                     |             |             |             |             |             |
| 1:36822024        | Cardiac_dysrhythmias                 | Muscular_dystrophies_and_other_myopathies           | 11.30548255 | 4.921300364 | 13.24716245 | 0.861210556 | 0.920838731 |
| ENSG00000116883.8 | Thyroid                              |                                                     |             |             |             |             |             |
| 1:36822024        | Cardiac_dysrhythmias                 | Muscular_dystrophies_and_other_myopathies           | 11.30548255 | 4.921300364 | 13.24716245 | 0.862588902 | 0.921332655 |
| ENSG00000116883.8 | Whole_Blood                          |                                                     |             |             |             |             |             |
| 1:36822024        | Cardiac_dysrhythmias                 | Other_conditions_of_brain                           | 11.30548255 | 3.450892471 | 12.03021144 | 0.861283041 | 0.829209674 |
| ENSG00000116883.8 | Adipose_Subcutaneous                 |                                                     |             |             |             |             |             |
| 1:36822024        | Cardiac_dysrhythmias                 | Other_conditions_of_brain                           | 11.30548255 | 3.450892471 | 12.03021144 | 0.863183623 | 0.836609941 |
| ENSG00000116883.8 | Adipose_Visceral_Omentum             |                                                     |             |             |             |             |             |
| 1:36822024        | Cardiac_dysrhythmias                 | Other_conditions_of_brain                           | 11.30548255 | 3.450892471 | 12.03021144 | 0.861887094 | 0.830000229 |
| ENSG00000116883.8 | Adrenal_Gland                        |                                                     |             |             |             |             |             |
| 1:36822024        | Cardiac_dysrhythmias                 | Other_conditions_of_brain                           | 11.30548255 | 3.450892471 | 12.03021144 | 0.86249238  | 0.832168885 |
| ENSG00000116883.8 | Artery_Aorta                         |                                                     |             |             |             |             |             |
| 1:36822024        | Cardiac_dysrhythmias                 | Other_conditions_of_brain                           | 11.30548255 | 3.450892471 | 12.03021144 | 0.861221993 | 0.82907301  |
| ENSG00000116883.8 | Artery_Tibial                        |                                                     |             |             |             |             |             |
| 1:36822024        | Cardiac_dysrhythmias                 | Other_conditions_of_brain                           | 11.30548255 | 3.450892471 | 12.03021144 | 0.86146861  | 0.829502004 |
| ENSG00000116883.8 | Brain_Anterior_cingulate_cortex_BA24 |                                                     |             |             |             |             |             |
| 1:36822024        | Cardiac_dysrhythmias                 | Other_conditions_of_brain                           | 11.30548255 | 3.450892471 | 12.03021144 | 0.897909934 | 0.884184037 |
| ENSG00000116883.8 | Brain_Caudate_basal_ganglia          |                                                     |             |             |             |             |             |
| 1:36822024        | Cardiac_dysrhythmias                 | Other_conditions_of_brain                           | 11.30548255 | 3.450892471 | 12.03021144 | 0.917491096 | 0.897162454 |
| ENSG00000116883.8 | Brain_Cerebellar_Hemisphere          |                                                     |             |             |             |             |             |
| 1:36822024        | Cardiac_dysrhythmias                 | Other_conditions_of_brain                           | 11.30548255 | 3.450892471 | 12.03021144 | 0.861218662 | 0.829062306 |
| ENSG00000116883.8 | Brain_Cerebellum                     |                                                     |             |             |             |             |             |
| 1:36822024        | Cardiac_dysrhythmias                 | Other_conditions_of_brain                           | 11.30548255 | 3.450892471 | 12.03021144 | 0.864549795 | 0.834382995 |
| ENSG00000116883.8 | Brain_Cortex                         |                                                     |             |             |             |             |             |
| 1:36822024        | Cardiac_dysrhythmias                 | Other_conditions_of_brain                           | 11.30548255 | 3.450892471 | 12.03021144 | 0.907989552 | 0.896004555 |
| ENSG00000116883.8 | Brain_Frontal_Cortex_BA9             |                                                     |             |             |             |             |             |
| 1:36822024        | Cardiac_dysrhythmias                 | Other_conditions_of_brain                           | 11.30548255 | 3.450892471 | 12.03021144 | 0.865168722 | 0.837035864 |
| ENSG00000116883.8 | Brain_Hippocampus                    |                                                     |             |             |             |             |             |
| 1:36822024        | Cardiac_dysrhythmias                 | Other_conditions_of_brain                           | 11.30548255 | 3.450892471 | 12.03021144 | 0.879602954 | 0.866987782 |
| ENSG00000116883.8 | Breast_Mammary_Tissue                |                                                     |             |             |             |             |             |
| 1:36822024        | Cardiac_dysrhythmias                 | Other_conditions_of_brain                           | 11.30548255 | 3.450892471 | 12.03021144 | 0.861223348 | 0.829068379 |
| ENSG00000116883.8 | Cells_EBV-transformed_lymphocytes    |                                                     |             |             |             |             |             |
| 1:36822024        | Cardiac_dysrhythmias                 | Other_conditions_of_brain                           | 11.30548255 | 3.450892471 | 12.03021144 | 0.861210573 | 0.829042001 |
| ENSG00000116883.8 | Cells_Transformed_fibroblasts        |                                                     |             |             |             |             |             |
| 1:36822024        | Cardiac_dysrhythmias                 | Other_conditions_of_brain                           | 11.30548255 | 3.450892471 | 12.03021144 | 0.942797102 | 0.915249517 |
| ENSG00000142694.6 | Colon_Sigmoid EVA1B                  | eva-1 homolog B [Source:HGNC Symbol;Acc:HGNC:25558] |             |             |             |             |             |

|            |                                                             |                                      |             |             |             |             |             |                   |
|------------|-------------------------------------------------------------|--------------------------------------|-------------|-------------|-------------|-------------|-------------|-------------------|
| 1:36822024 | Cardiac_dysrhythmias<br>Colon_Transverse                    | Other_conditions_of_brain            | 11.30548255 | 3.450892471 | 12.03021144 | 0.862228593 | 0.831793822 | ENSG00000116883.8 |
| 1:36822024 | Cardiac_dysrhythmias<br>Esophagus_Gastroesophageal_Junction | Other_conditions_of_brain            | 11.30548255 | 3.450892471 | 12.03021144 | 0.893110156 | 0.881545184 | ENSG00000116883.8 |
| 1:36822024 | Cardiac_dysrhythmias<br>Esophagus_Mucosa                    | Other_conditions_of_brain            | 11.30548255 | 3.450892471 | 12.03021144 | 0.861210556 | 0.829041786 | ENSG00000116883.8 |
| 1:36822024 | Cardiac_dysrhythmias<br>Esophagus_Muscularis                | Other_conditions_of_brain<br>EVA1B   | 11.30548255 | 3.450892471 | 12.03021144 | 0.862310404 | 0.830705284 | ENSG00000142694.6 |
| 1:36822024 | Cardiac_dysrhythmias<br>Heart_Atrial_Appendage              | Other_conditions_of_brain            | 11.30548255 | 3.450892471 | 12.03021144 | 0.861210571 | 0.829041828 | ENSG00000116883.8 |
| 1:36822024 | Cardiac_dysrhythmias<br>Heart_Left_Ventricle                | Other_conditions_of_brain            | 11.30548255 | 3.450892471 | 12.03021144 | 0.861216989 | 0.829061957 | ENSG00000116883.8 |
| 1:36822024 | Cardiac_dysrhythmias<br>Lung                                | Other_conditions_of_brain            | 11.30548255 | 3.450892471 | 12.03021144 | 0.861210559 | 0.829041812 | ENSG00000116883.8 |
| 1:36822024 | Cardiac_dysrhythmias<br>Muscle_Skeletal TRAPPC3             | Other_conditions_of_brain            | 11.30548255 | 3.450892471 | 12.03021144 | 0.937448099 | 0.927871436 | ENSG00000054116.7 |
| 1:36822024 | Cardiac_dysrhythmias<br>Nerve_Tibial                        | Other_conditions_of_brain            | 11.30548255 | 3.450892471 | 12.03021144 | 0.861211148 | 0.829043955 | ENSG00000116883.8 |
| 1:36822024 | Cardiac_dysrhythmias<br>Pancreas                            | Other_conditions_of_brain            | 11.30548255 | 3.450892471 | 12.03021144 | 0.886746137 | 0.908569929 | ENSG00000116883.8 |
| 1:36822024 | Cardiac_dysrhythmias<br>Pituitary                           | Other_conditions_of_brain            | 11.30548255 | 3.450892471 | 12.03021144 | 0.861729724 | 0.830998945 | ENSG00000116883.8 |
| 1:36822024 | Cardiac_dysrhythmias<br>Skin_Not_Sun_Exposed_Suprapubic     | Other_conditions_of_brain            | 11.30548255 | 3.450892471 | 12.03021144 | 0.861214598 | 0.829062672 | ENSG00000116883.8 |
| 1:36822024 | Cardiac_dysrhythmias<br>Skin_Sun_Exposed_Lower_leg          | Other_conditions_of_brain            | 11.30548255 | 3.450892471 | 12.03021144 | 0.861210562 | 0.829041808 | ENSG00000116883.8 |
| 1:36822024 | Cardiac_dysrhythmias<br>Small_Intestine_Terminal_Ileum      | Other_conditions_of_brain            | 11.30548255 | 3.450892471 | 12.03021144 | 0.923029605 | 0.889968369 | ENSG00000116883.8 |
| 1:36822024 | Cardiac_dysrhythmias<br>Spleen                              | Other_conditions_of_brain            | 11.30548255 | 3.450892471 | 12.03021144 | 0.871564171 | 0.84555148  | ENSG00000116883.8 |
| 1:36822024 | Cardiac_dysrhythmias<br>Stomach                             | Other_conditions_of_brain            | 11.30548255 | 3.450892471 | 12.03021144 | 0.864413778 | 0.834200303 | ENSG00000116883.8 |
| 1:36822024 | Cardiac_dysrhythmias<br>Testis                              | Other_conditions_of_brain            | 11.30548255 | 3.450892471 | 12.03021144 | 0.863126358 | 0.834946004 | ENSG00000116883.8 |
| 1:36822024 | Cardiac_dysrhythmias<br>Thyroid                             | Other_conditions_of_brain            | 11.30548255 | 3.450892471 | 12.03021144 | 0.861210556 | 0.829041786 | ENSG00000116883.8 |
| 1:36822024 | Cardiac_dysrhythmias<br>Whole_Blood                         | Other_conditions_of_brain            | 11.30548255 | 3.450892471 | 12.03021144 | 0.862588902 | 0.831848993 | ENSG00000116883.8 |
| 1:36822024 | Cardiac_dysrhythmias                                        | "Pain,_not_elsewhere_classified"     | 11.30548255 | 4.151441428 | 12.36268315 | 0.861283041 | 0.886609146 | ENSG00000116883.8 |
| 1:36822024 | Cardiac_dysrhythmias                                        | Adipose_Subcutaneous                 | 11.30548255 | 4.151441428 | 12.36268315 | 0.863183623 | 0.885732029 | ENSG00000116883.8 |
| 1:36822024 | Cardiac_dysrhythmias                                        | Adipose_Visceral_Omentum             | 11.30548255 | 4.151441428 | 12.36268315 | 0.861887094 | 0.886916126 | ENSG00000116883.8 |
| 1:36822024 | Cardiac_dysrhythmias                                        | Adrenal_Gland                        | 11.30548255 | 4.151441428 | 12.36268315 | 0.86249238  | 0.886433462 | ENSG00000116883.8 |
| 1:36822024 | Cardiac_dysrhythmias                                        | Artery_Aorta                         | 11.30548255 | 4.151441428 | 12.36268315 | 0.861221993 | 0.886614057 | ENSG00000116883.8 |
| 1:36822024 | Cardiac_dysrhythmias                                        | Artery_Tibial                        | 11.30548255 | 4.151441428 | 12.36268315 | 0.86146861  | 0.886687658 | ENSG00000116883.8 |
| 1:36822024 | Cardiac_dysrhythmias                                        | Brain_Anterior_cingulate_cortex_BA24 | 11.30548255 | 4.151441428 | 12.36268315 | 0.897909934 | 0.903919773 | ENSG00000116883.8 |
| 1:36822024 | Cardiac_dysrhythmias                                        | "Pain,_not_elsewhere_classified"     | 11.30548255 | 4.151441428 | 12.36268315 | 0.897909934 | 0.903919773 | ENSG00000116883.8 |
| 1:36822024 | Cardiac_dysrhythmias                                        | Brain_Caudate_basal_ganglia          | 11.30548255 | 4.151441428 | 12.36268315 | 0.897909934 | 0.903919773 | ENSG00000116883.8 |

|                   |                                     |                                                                                    |             |             |             |             |             |
|-------------------|-------------------------------------|------------------------------------------------------------------------------------|-------------|-------------|-------------|-------------|-------------|
| 1:36822024        | Cardiac_dysrhythmias                | "Pain,_not_elsewhere_classified"                                                   | 11.30548255 | 4.151441428 | 12.36268315 | 0.917491096 | 0.919501793 |
| ENSG00000116883.8 | Brain_Cerebellar_Hemisphere         |                                                                                    |             |             |             |             |             |
| 1:36822024        | Cardiac_dysrhythmias                | "Pain,_not_elsewhere_classified"                                                   | 11.30548255 | 4.151441428 | 12.36268315 | 0.861218662 | 0.886615713 |
| ENSG00000116883.8 | Brain_Cerebellum                    |                                                                                    |             |             |             |             |             |
| 1:36822024        | Cardiac_dysrhythmias                | "Pain,_not_elsewhere_classified"                                                   | 11.30548255 | 4.151441428 | 12.36268315 | 0.864549795 | 0.887422977 |
| ENSG00000116883.8 | Brain_Cortex                        |                                                                                    |             |             |             |             |             |
| 1:36822024        | Cardiac_dysrhythmias                | "Pain,_not_elsewhere_classified"                                                   | 11.30548255 | 4.151441428 | 12.36268315 | 0.907989552 | 0.910938086 |
| ENSG00000116883.8 | Brain_Frontal_Cortex_BA9            |                                                                                    |             |             |             |             |             |
| 1:36822024        | Cardiac_dysrhythmias                | "Pain,_not_elsewhere_classified"                                                   | 11.30548255 | 4.151441428 | 12.36268315 | 0.865168722 | 0.889065966 |
| ENSG00000116883.8 | Brain_Hippocampus                   |                                                                                    |             |             |             |             |             |
| 1:36822024        | Cardiac_dysrhythmias                | "Pain,_not_elsewhere_classified"                                                   | 11.30548255 | 4.151441428 | 12.36268315 | 0.879602954 | 0.890636441 |
| ENSG00000116883.8 | Breast_Mammary_Tissue               |                                                                                    |             |             |             |             |             |
| 1:36822024        | Cardiac_dysrhythmias                | "Pain,_not_elsewhere_classified"                                                   | 11.30548255 | 4.151441428 | 12.36268315 | 0.861223348 | 0.886614956 |
| ENSG00000116883.8 | Cells_EBV-transformed_lymphocytes   |                                                                                    |             |             |             |             |             |
| 1:36822024        | Cardiac_dysrhythmias                | "Pain,_not_elsewhere_classified"                                                   | 11.30548255 | 4.151441428 | 12.36268315 | 0.861210573 | 0.886609621 |
| ENSG00000116883.8 | Cells_Transformed_fibroblasts       |                                                                                    |             |             |             |             |             |
| 1:36822024        | Cardiac_dysrhythmias                | "Pain,_not_elsewhere_classified"                                                   | 11.30548255 | 4.151441428 | 12.36268315 | 0.942797102 | 0.932262388 |
| ENSG00000142694.6 | Colon_Sigmoid                       | EVA1B eva-1 homolog B [Source:HGNC Symbol;Acc:HGNC:25558]                          |             |             |             |             |             |
| 1:36822024        | Cardiac_dysrhythmias                | "Pain,_not_elsewhere_classified"                                                   | 11.30548255 | 4.151441428 | 12.36268315 | 0.862228593 | 0.886823296 |
| ENSG00000116883.8 | Colon_Transverse                    |                                                                                    |             |             |             |             |             |
| 1:36822024        | Cardiac_dysrhythmias                | "Pain,_not_elsewhere_classified"                                                   | 11.30548255 | 4.151441428 | 12.36268315 | 0.893110156 | 0.906294166 |
| ENSG00000116883.8 | Esophagus_Gastroesophageal_Junction |                                                                                    |             |             |             |             |             |
| 1:36822024        | Cardiac_dysrhythmias                | "Pain,_not_elsewhere_classified"                                                   | 11.30548255 | 4.151441428 | 12.36268315 | 0.861210556 | 0.886609649 |
| ENSG00000116883.8 | Esophagus_Mucosa                    |                                                                                    |             |             |             |             |             |
| 1:36822024        | Cardiac_dysrhythmias                | "Pain,_not_elsewhere_classified"                                                   | 11.30548255 | 4.151441428 | 12.36268315 | 0.862310404 | 0.886984178 |
| ENSG00000142694.6 | Esophagus_Muscularis                | EVA1B eva-1 homolog B [Source:HGNC Symbol;Acc:HGNC:25558]                          |             |             |             |             |             |
| 1:36822024        | Cardiac_dysrhythmias                | "Pain,_not_elsewhere_classified"                                                   | 11.30548255 | 4.151441428 | 12.36268315 | 0.861210571 | 0.88660965  |
| ENSG00000116883.8 | Heart_Atrial_Appendage              |                                                                                    |             |             |             |             |             |
| 1:36822024        | Cardiac_dysrhythmias                | "Pain,_not_elsewhere_classified"                                                   | 11.30548255 | 4.151441428 | 12.36268315 | 0.861216989 | 0.886609425 |
| ENSG00000116883.8 | Heart_Left_Ventricle                |                                                                                    |             |             |             |             |             |
| 1:36822024        | Cardiac_dysrhythmias                | "Pain,_not_elsewhere_classified"                                                   | 11.30548255 | 4.151441428 | 12.36268315 | 0.861210559 | 0.886609646 |
| ENSG00000116883.8 | Lung                                |                                                                                    |             |             |             |             |             |
| 1:36822024        | Cardiac_dysrhythmias                | "Pain,_not_elsewhere_classified"                                                   | 11.30548255 | 4.151441428 | 12.36268315 | 0.937448099 | 0.91954505  |
| ENSG00000054116.7 | Muscle_Skeletal                     | TRAPPC3 trafficking protein particle complex 3 [Source:HGNC Symbol;Acc:HGNC:19942] |             |             |             |             |             |
| 1:36822024        | Cardiac_dysrhythmias                | "Pain,_not_elsewhere_classified"                                                   | 11.30548255 | 4.151441428 | 12.36268315 | 0.861211148 | 0.886609623 |
| ENSG00000116883.8 | Nerve_Tibial                        |                                                                                    |             |             |             |             |             |
| 1:36822024        | Cardiac_dysrhythmias                | "Pain,_not_elsewhere_classified"                                                   | 11.30548255 | 4.151441428 | 12.36268315 | 0.886746137 | 0.882157489 |
| ENSG00000116883.8 | Pancreas                            |                                                                                    |             |             |             |             |             |
| 1:36822024        | Cardiac_dysrhythmias                | "Pain,_not_elsewhere_classified"                                                   | 11.30548255 | 4.151441428 | 12.36268315 | 0.861729724 | 0.886593689 |
| ENSG00000116883.8 | Pituitary                           |                                                                                    |             |             |             |             |             |
| 1:36822024        | Cardiac_dysrhythmias                | "Pain,_not_elsewhere_classified"                                                   | 11.30548255 | 4.151441428 | 12.36268315 | 0.861214598 | 0.88660793  |
| ENSG00000116883.8 | Skin_Not_Sun_Exposed_Suprapubic     |                                                                                    |             |             |             |             |             |
| 1:36822024        | Cardiac_dysrhythmias                | "Pain,_not_elsewhere_classified"                                                   | 11.30548255 | 4.151441428 | 12.36268315 | 0.861210562 | 0.886609647 |
| ENSG00000116883.8 | Skin_Sun_Exposed_Lower_leg          |                                                                                    |             |             |             |             |             |
| 1:36822024        | Cardiac_dysrhythmias                | "Pain,_not_elsewhere_classified"                                                   | 11.30548255 | 4.151441428 | 12.36268315 | 0.923029605 | 0.912396204 |
| ENSG00000116883.8 | Small_Intestine_Terminal_Ileum      |                                                                                    |             |             |             |             |             |
| 1:36822024        | Cardiac_dysrhythmias                | "Pain,_not_elsewhere_classified"                                                   | 11.30548255 | 4.151441428 | 12.36268315 | 0.871564171 | 0.890268511 |
| ENSG00000116883.8 | Spleen                              |                                                                                    |             |             |             |             |             |
| 1:36822024        | Cardiac_dysrhythmias                | "Pain,_not_elsewhere_classified"                                                   | 11.30548255 | 4.151441428 | 12.36268315 | 0.864413778 | 0.887281608 |
| ENSG00000116883.8 | Stomach                             |                                                                                    |             |             |             |             |             |
| 1:36822024        | Cardiac_dysrhythmias                | "Pain,_not_elsewhere_classified"                                                   | 11.30548255 | 4.151441428 | 12.36268315 | 0.863126358 | 0.887657882 |
| ENSG00000116883.8 | Testis                              |                                                                                    |             |             |             |             |             |

|                   |                                      |                                                                                    |             |             |             |             |             |
|-------------------|--------------------------------------|------------------------------------------------------------------------------------|-------------|-------------|-------------|-------------|-------------|
| 1:36822024        | Cardiac_dysrhythmias                 | "Pain,_not_elsewhere_classified"                                                   | 11.30548255 | 4.151441428 | 12.36268315 | 0.861210556 | 0.886609649 |
| ENSG00000116883.8 | Thyroid                              |                                                                                    |             |             |             |             |             |
| 1:36822024        | Cardiac_dysrhythmias                 | "Pain,_not_elsewhere_classified"                                                   | 11.30548255 | 4.151441428 | 12.36268315 | 0.862588902 | 0.887557439 |
| ENSG00000116883.8 | Whole_Blood                          |                                                                                    |             |             |             |             |             |
| 1:36822024        | Essential_hypertension               | Muscular_dystrophies_and_other_myopathies                                          | 9.125112489 | 4.921300364 | 11.32547558 | 0.869678405 | 0.920850775 |
| ENSG00000116883.8 | Adipose_Subcutaneous                 |                                                                                    |             |             |             |             |             |
| 1:36822024        | Essential_hypertension               | Muscular_dystrophies_and_other_myopathies                                          | 9.125112489 | 4.921300364 | 11.32547558 | 0.870704151 | 0.92119375  |
| ENSG00000116883.8 | Adipose_Visceral_Omentum             |                                                                                    |             |             |             |             |             |
| 1:36822024        | Essential_hypertension               | Muscular_dystrophies_and_other_myopathies                                          | 9.125112489 | 4.921300364 | 11.32547558 | 0.870176607 | 0.920938571 |
| ENSG00000116883.8 | Adrenal_Gland                        |                                                                                    |             |             |             |             |             |
| 1:36822024        | Essential_hypertension               | Muscular_dystrophies_and_other_myopathies                                          | 9.125112489 | 4.921300364 | 11.32547558 | 0.870217485 | 0.920999584 |
| ENSG00000116883.8 | Artery_Aorta                         |                                                                                    |             |             |             |             |             |
| 1:36822024        | Essential_hypertension               | Muscular_dystrophies_and_other_myopathies                                          | 9.125112489 | 4.921300364 | 11.32547558 | 0.869646478 | 0.920841474 |
| ENSG00000116883.8 | Artery_Tibial                        |                                                                                    |             |             |             |             |             |
| 1:36822024        | Essential_hypertension               | Muscular_dystrophies_and_other_myopathies                                          | 9.125112489 | 4.921300364 | 11.32547558 | 0.869836622 | 0.920869003 |
| ENSG00000116883.8 | Brain_Anterior_cingulate_cortex_BA24 |                                                                                    |             |             |             |             |             |
| 1:36822024        | Essential_hypertension               | Muscular_dystrophies_and_other_myopathies                                          | 9.125112489 | 4.921300364 | 11.32547558 | 0.901374002 | 0.927191334 |
| ENSG00000116883.8 | Brain_Caudate_basal_ganglia          |                                                                                    |             |             |             |             |             |
| 1:36822024        | Essential_hypertension               | Muscular_dystrophies_and_other_myopathies                                          | 9.125112489 | 4.921300364 | 11.32547558 | 0.907925884 | 0.931081949 |
| ENSG00000116883.8 | Brain_Cerebellar_Hemisphere          |                                                                                    |             |             |             |             |             |
| 1:36822024        | Essential_hypertension               | Muscular_dystrophies_and_other_myopathies                                          | 9.125112489 | 4.921300364 | 11.32547558 | 0.869643207 | 0.920841975 |
| ENSG00000116883.8 | Brain_Cerebellum                     |                                                                                    |             |             |             |             |             |
| 1:36822024        | Essential_hypertension               | Muscular_dystrophies_and_other_myopathies                                          | 9.125112489 | 4.921300364 | 11.32547558 | 0.871817039 | 0.921176787 |
| ENSG00000116883.8 | Brain_Cortex                         |                                                                                    |             |             |             |             |             |
| 1:36822024        | Essential_hypertension               | Muscular_dystrophies_and_other_myopathies                                          | 9.125112489 | 4.921300364 | 11.32547558 | 0.905427206 | 0.931036204 |
| ENSG00000116883.8 | Brain_Frontal_Cortex_BA9             |                                                                                    |             |             |             |             |             |
| 1:36822024        | Essential_hypertension               | Muscular_dystrophies_and_other_myopathies                                          | 9.125112489 | 4.921300364 | 11.32547558 | 0.873173775 | 0.921507273 |
| ENSG00000116883.8 | Brain_Hippocampus                    |                                                                                    |             |             |             |             |             |
| 1:36822024        | Essential_hypertension               | Muscular_dystrophies_and_other_myopathies                                          | 9.125112489 | 4.921300364 | 11.32547558 | 0.881171138 | 0.923590672 |
| ENSG00000116883.8 | Breast_Mammary_Tissue                |                                                                                    |             |             |             |             |             |
| 1:36822024        | Essential_hypertension               | Muscular_dystrophies_and_other_myopathies                                          | 9.125112489 | 4.921300364 | 11.32547558 | 0.869641417 | 0.920840627 |
| ENSG00000116883.8 | Cells_EBV-transformed_lymphocytes    |                                                                                    |             |             |             |             |             |
| 1:36822024        | Essential_hypertension               | Muscular_dystrophies_and_other_myopathies                                          | 9.125112489 | 4.921300364 | 11.32547558 | 0.869631496 | 0.920838726 |
| ENSG00000116883.8 | Cells_Transformed_fibroblasts        |                                                                                    |             |             |             |             |             |
| 1:36822024        | Essential_hypertension               | Muscular_dystrophies_and_other_myopathies                                          | 9.125112489 | 4.921300364 | 11.32547558 | 0.946051841 | 0.935620748 |
| ENSG00000142694.6 | Colon_Sigmoid                        | EVA1B eva-1 homolog B [Source:HGNC Symbol;Acc:HGNC:25558]                          |             |             |             |             |             |
| 1:36822024        | Essential_hypertension               | Muscular_dystrophies_and_other_myopathies                                          | 9.125112489 | 4.921300364 | 11.32547558 | 0.870349275 | 0.921044387 |
| ENSG00000116883.8 | Colon_Transverse                     |                                                                                    |             |             |             |             |             |
| 1:36822024        | Essential_hypertension               | Muscular_dystrophies_and_other_myopathies                                          | 9.125112489 | 4.921300364 | 11.32547558 | 0.900621194 | 0.930131318 |
| ENSG00000116883.8 | Esophagus_Gastroesophageal_Junction  |                                                                                    |             |             |             |             |             |
| 1:36822024        | Essential_hypertension               | Muscular_dystrophies_and_other_myopathies                                          | 9.125112489 | 4.921300364 | 11.32547558 | 0.869631358 | 0.920838731 |
| ENSG00000116883.8 | Esophagus_Mucosa                     |                                                                                    |             |             |             |             |             |
| 1:36822024        | Essential_hypertension               | Muscular_dystrophies_and_other_myopathies                                          | 9.125112489 | 4.921300364 | 11.32547558 | 0.872251323 | 0.920873651 |
| ENSG00000142694.6 | Esophagus_Muscularis                 | EVA1B eva-1 homolog B [Source:HGNC Symbol;Acc:HGNC:25558]                          |             |             |             |             |             |
| 1:36822024        | Essential_hypertension               | Muscular_dystrophies_and_other_myopathies                                          | 9.125112489 | 4.921300364 | 11.32547558 | 0.869631365 | 0.920838734 |
| ENSG00000116883.8 | Heart_Atrial_Appendage               |                                                                                    |             |             |             |             |             |
| 1:36822024        | Essential_hypertension               | Muscular_dystrophies_and_other_myopathies                                          | 9.125112489 | 4.921300364 | 11.32547558 | 0.869635665 | 0.920839701 |
| ENSG00000116883.8 | Heart_Left_Ventricle                 |                                                                                    |             |             |             |             |             |
| 1:36822024        | Essential_hypertension               | Muscular_dystrophies_and_other_myopathies                                          | 9.125112489 | 4.921300364 | 11.32547558 | 0.86963137  | 0.920838731 |
| ENSG00000116883.8 | Lung                                 |                                                                                    |             |             |             |             |             |
| 1:36822024        | Essential_hypertension               | Muscular_dystrophies_and_other_myopathies                                          | 9.125112489 | 4.921300364 | 11.32547558 | 0.933611093 | 0.940270926 |
| ENSG00000054116.7 | Muscle_Skeletal                      | TRAPPC3 trafficking protein particle complex 3 [Source:HGNC Symbol;Acc:HGNC:19942] |             |             |             |             |             |

|                   |                                      |                                           |             |             |             |             |             |                   |
|-------------------|--------------------------------------|-------------------------------------------|-------------|-------------|-------------|-------------|-------------|-------------------|
| 1:36822024        | Essential_hypertension               | Muscular_dystrophies_and_other_myopathies |             | 9.125112489 | 4.921300364 | 11.32547558 | 0.869632027 | 0.92083881        |
| ENSG00000116883.8 | Nerve_Tibial                         |                                           |             |             |             |             |             |                   |
| 1:36822024        | Essential_hypertension               | Muscular_dystrophies_and_other_myopathies |             | 9.125112489 | 4.921300364 | 11.32547558 | 0.921115635 | 0.920239785       |
| ENSG00000116883.8 | Pancreas                             |                                           |             |             |             |             |             |                   |
| 1:36822024        | Essential_hypertension               | Muscular_dystrophies_and_other_myopathies |             | 9.125112489 | 4.921300364 | 11.32547558 | 0.870545509 | 0.920872258       |
| ENSG00000116883.8 | Pituitary                            |                                           |             |             |             |             |             |                   |
| 1:36822024        | Essential_hypertension               | Muscular_dystrophies_and_other_myopathies |             | 9.125112489 | 4.921300364 | 11.32547558 | 0.869641177 | 0.920838708       |
| ENSG00000116883.8 | Skin_Not_Sun_Exposed_Suprapubic      |                                           |             |             |             |             |             |                   |
| 1:36822024        | Essential_hypertension               | Muscular_dystrophies_and_other_myopathies |             | 9.125112489 | 4.921300364 | 11.32547558 | 0.869631361 | 0.920838732       |
| ENSG00000116883.8 | Skin_Sun_Exposed_Lower_leg           |                                           |             |             |             |             |             |                   |
| 1:36822024        | Essential_hypertension               | Muscular_dystrophies_and_other_myopathies |             | 9.125112489 | 4.921300364 | 11.32547558 | 0.904286839 | 0.929423492       |
| ENSG00000116883.8 | Small_Intestine_Terminal_Ileum       |                                           |             |             |             |             |             |                   |
| 1:36822024        | Essential_hypertension               | Muscular_dystrophies_and_other_myopathies |             | 9.125112489 | 4.921300364 | 11.32547558 | 0.878658364 | 0.922205276       |
| ENSG00000116883.8 | Spleen                               |                                           |             |             |             |             |             |                   |
| 1:36822024        | Essential_hypertension               | Muscular_dystrophies_and_other_myopathies |             | 9.125112489 | 4.921300364 | 11.32547558 | 0.871726631 | 0.921144174       |
| ENSG00000116883.8 | Stomach                              |                                           |             |             |             |             |             |                   |
| 1:36822024        | Essential_hypertension               | Muscular_dystrophies_and_other_myopathies |             | 9.125112489 | 4.921300364 | 11.32547558 | 0.872149557 | 0.92195204        |
| ENSG00000116883.8 | Testis                               |                                           |             |             |             |             |             |                   |
| 1:36822024        | Essential_hypertension               | Muscular_dystrophies_and_other_myopathies |             | 9.125112489 | 4.921300364 | 11.32547558 | 0.869631358 | 0.920838731       |
| ENSG00000116883.8 | Thyroid                              |                                           |             |             |             |             |             |                   |
| 1:36822024        | Essential_hypertension               | Muscular_dystrophies_and_other_myopathies |             | 9.125112489 | 4.921300364 | 11.32547558 | 0.871565197 | 0.921332655       |
| ENSG00000116883.8 | Whole_Blood                          |                                           |             |             |             |             |             |                   |
| 1:36822024        | Heart_failure                        | Muscular_dystrophies_and_other_myopathies | 10.02900263 | 4.921300364 | 11.98763286 | 0.824186361 | 0.920850775 | ENSG00000116883.8 |
|                   | Adipose_Subcutaneous                 |                                           |             |             |             |             |             |                   |
| 1:36822024        | Heart_failure                        | Muscular_dystrophies_and_other_myopathies | 10.02900263 | 4.921300364 | 11.98763286 | 0.825823186 | 0.92119375  | ENSG00000116883.8 |
|                   | Adipose_Visceral_Omentum             |                                           |             |             |             |             |             |                   |
| 1:36822024        | Heart_failure                        | Muscular_dystrophies_and_other_myopathies | 10.02900263 | 4.921300364 | 11.98763286 | 0.827085234 | 0.920938571 | ENSG00000116883.8 |
|                   | Adrenal_Gland                        |                                           |             |             |             |             |             |                   |
| 1:36822024        | Heart_failure                        | Muscular_dystrophies_and_other_myopathies | 10.02900263 | 4.921300364 | 11.98763286 | 0.825440099 | 0.920999584 | ENSG00000116883.8 |
|                   | Artery_Aorta                         |                                           |             |             |             |             |             |                   |
| 1:36822024        | Heart_failure                        | Muscular_dystrophies_and_other_myopathies | 10.02900263 | 4.921300364 | 11.98763286 | 0.823869396 | 0.920841474 | ENSG00000116883.8 |
|                   | Artery_Tibial                        |                                           |             |             |             |             |             |                   |
| 1:36822024        | Heart_failure                        | Muscular_dystrophies_and_other_myopathies | 10.02900263 | 4.921300364 | 11.98763286 | 0.824111156 | 0.920869003 | ENSG00000116883.8 |
|                   | Brain_Anterior_cingulate_cortex_BA24 |                                           |             |             |             |             |             |                   |
| 1:36822024        | Heart_failure                        | Muscular_dystrophies_and_other_myopathies | 10.02900263 | 4.921300364 | 11.98763286 | 0.876644748 | 0.927191334 | ENSG00000116883.8 |
|                   | Brain_Caudate_basal_ganglia          |                                           |             |             |             |             |             |                   |
| 1:36822024        | Heart_failure                        | Muscular_dystrophies_and_other_myopathies | 10.02900263 | 4.921300364 | 11.98763286 | 0.935379322 | 0.931081949 | ENSG00000116883.8 |
|                   | Brain_Cerebellar_Hemisphere          |                                           |             |             |             |             |             |                   |
| 1:36822024        | Heart_failure                        | Muscular_dystrophies_and_other_myopathies | 10.02900263 | 4.921300364 | 11.98763286 | 0.823945917 | 0.920841975 | ENSG00000116883.8 |
|                   | Brain_Cerebellum                     |                                           |             |             |             |             |             |                   |
| 1:36822024        | Heart_failure                        | Muscular_dystrophies_and_other_myopathies | 10.02900263 | 4.921300364 | 11.98763286 | 0.828315817 | 0.921176787 | ENSG00000116883.8 |
|                   | Brain_Cortex                         |                                           |             |             |             |             |             |                   |
| 1:36822024        | Heart_failure                        | Muscular_dystrophies_and_other_myopathies | 10.02900263 | 4.921300364 | 11.98763286 | 0.893335305 | 0.931036204 | ENSG00000116883.8 |
|                   | Brain_Frontal_Cortex_BA9             |                                           |             |             |             |             |             |                   |
| 1:36822024        | Heart_failure                        | Muscular_dystrophies_and_other_myopathies | 10.02900263 | 4.921300364 | 11.98763286 | 0.831719039 | 0.921507273 | ENSG00000116883.8 |
|                   | Brain_Hippocampus                    |                                           |             |             |             |             |             |                   |
| 1:36822024        | Heart_failure                        | Muscular_dystrophies_and_other_myopathies | 10.02900263 | 4.921300364 | 11.98763286 | 0.848285438 | 0.923590672 | ENSG00000116883.8 |
|                   | Breast_Mammary_Tissue                |                                           |             |             |             |             |             |                   |
| 1:36822024        | Heart_failure                        | Muscular_dystrophies_and_other_myopathies | 10.02900263 | 4.921300364 | 11.98763286 | 0.823710476 | 0.920840627 | ENSG00000116883.8 |
|                   | Cells_EBV-transformed_lymphocytes    |                                           |             |             |             |             |             |                   |
| 1:36822024        | Heart_failure                        | Muscular_dystrophies_and_other_myopathies | 10.02900263 | 4.921300364 | 11.98763286 | 0.823688495 | 0.920838726 | ENSG00000116883.8 |
|                   | Cells_Transformed_fibroblasts        |                                           |             |             |             |             |             |                   |

|            |                                      |                                                                                       |             |             |             |             |             |                   |
|------------|--------------------------------------|---------------------------------------------------------------------------------------|-------------|-------------|-------------|-------------|-------------|-------------------|
| 1:36822024 | Heart_failure                        | Muscular_dystrophies_and_other_myopathies                                             | 10.02900263 | 4.921300364 | 11.98763286 | 0.946331237 | 0.935620748 | ENSG00000142694.6 |
| 1:36822024 | Colon_Sigmoid                        | EVA1B<br>eva-1 homolog B [Source:HGNC Symbol;Acc:HGNC:25558]                          | 10.02900263 | 4.921300364 | 11.98763286 | 0.832516748 | 0.921044387 | ENSG00000116883.8 |
| 1:36822024 | Heart_failure                        | Muscular_dystrophies_and_other_myopathies                                             | 10.02900263 | 4.921300364 | 11.98763286 | 0.961922917 | 0.930131318 | ENSG00000116883.8 |
| 1:36822024 | Esophagus_Gastroesophageal_Junction  | Muscular_dystrophies_and_other_myopathies                                             | 10.02900263 | 4.921300364 | 11.98763286 | 0.823688195 | 0.920838731 | ENSG00000116883.8 |
| 1:36822024 | Heart_failure                        | Muscular_dystrophies_and_other_myopathies                                             | 10.02900263 | 4.921300364 | 11.98763286 | 0.824265193 | 0.920873651 | ENSG00000142694.6 |
| 1:36822024 | Esophagus_Muscularis                 | EVA1B<br>eva-1 homolog B [Source:HGNC Symbol;Acc:HGNC:25558]                          | 10.02900263 | 4.921300364 | 11.98763286 | 0.823688209 | 0.920838734 | ENSG00000116883.8 |
| 1:36822024 | Heart_failure                        | Muscular_dystrophies_and_other_myopathies                                             | 10.02900263 | 4.921300364 | 11.98763286 | 0.823697275 | 0.920839701 | ENSG00000116883.8 |
| 1:36822024 | Heart_failure                        | Muscular_dystrophies_and_other_myopathies                                             | 10.02900263 | 4.921300364 | 11.98763286 | 0.823688217 | 0.920838731 | ENSG00000116883.8 |
| 1:36822024 | Lung                                 | Muscular_dystrophies_and_other_myopathies                                             | 10.02900263 | 4.921300364 | 11.98763286 | 0.949811887 | 0.940270926 | ENSG00000054116.7 |
| 1:36822024 | Muscle_Skeletal                      | TRAPPC3<br>trafficking protein particle complex 3 [Source:HGNC Symbol;Acc:HGNC:19942] | 10.02900263 | 4.921300364 | 11.98763286 | 0.823692003 | 0.92083881  | ENSG00000116883.8 |
| 1:36822024 | Nerve_Tibial                         | Muscular_dystrophies_and_other_myopathies                                             | 10.02900263 | 4.921300364 | 11.98763286 | 0.855748575 | 0.920239785 | ENSG00000116883.8 |
| 1:36822024 | Pancreas                             | Muscular_dystrophies_and_other_myopathies                                             | 10.02900263 | 4.921300364 | 11.98763286 | 0.824541053 | 0.920872258 | ENSG00000116883.8 |
| 1:36822024 | Pituitary                            | Muscular_dystrophies_and_other_myopathies                                             | 10.02900263 | 4.921300364 | 11.98763286 | 0.823710661 | 0.920838708 | ENSG00000116883.8 |
| 1:36822024 | Skin_Not_Sun_Exposed_Suprapubic      | Muscular_dystrophies_and_other_myopathies                                             | 10.02900263 | 4.921300364 | 11.98763286 | 0.823688202 | 0.920838732 | ENSG00000116883.8 |
| 1:36822024 | Skin_Sun_Exposed_Lower_leg           | Muscular_dystrophies_and_other_myopathies                                             | 10.02900263 | 4.921300364 | 11.98763286 | 0.922295669 | 0.929423492 | ENSG00000116883.8 |
| 1:36822024 | Small_Intestine_Terminal_Ileum       | Muscular_dystrophies_and_other_myopathies                                             | 10.02900263 | 4.921300364 | 11.98763286 | 0.838977049 | 0.922205276 | ENSG00000116883.8 |
| 1:36822024 | Spleen                               | Muscular_dystrophies_and_other_myopathies                                             | 10.02900263 | 4.921300364 | 11.98763286 | 0.830082032 | 0.921144174 | ENSG00000116883.8 |
| 1:36822024 | Stomach                              | Muscular_dystrophies_and_other_myopathies                                             | 10.02900263 | 4.921300364 | 11.98763286 | 0.827901768 | 0.92195204  | ENSG00000116883.8 |
| 1:36822024 | Testis                               | Muscular_dystrophies_and_other_myopathies                                             | 10.02900263 | 4.921300364 | 11.98763286 | 0.823688195 | 0.920838731 | ENSG00000116883.8 |
| 1:36822024 | Thyroid                              | Muscular_dystrophies_and_other_myopathies                                             | 10.02900263 | 4.921300364 | 11.98763286 | 0.857479637 | 0.921332655 | ENSG00000116883.8 |
| 1:36822024 | Whole_Blood                          | Muscular_dystrophies_and_other_myopathies                                             | 10.02900263 | 4.921300364 | 11.98763286 | 0.829209674 | 0.921332655 | ENSG00000116883.8 |
| 1:36822024 | Adipose_Subcutaneous                 | Other_conditions_of_brain                                                             | 10.02900263 | 3.450892471 | 11.06379168 | 0.824186361 | 0.829209674 | ENSG00000116883.8 |
| 1:36822024 | Adipose_Visceral_Omentum             | Other_conditions_of_brain                                                             | 10.02900263 | 3.450892471 | 11.06379168 | 0.825823186 | 0.836609941 | ENSG00000116883.8 |
| 1:36822024 | Adrenal_Gland                        | Other_conditions_of_brain                                                             | 10.02900263 | 3.450892471 | 11.06379168 | 0.827085234 | 0.830000229 | ENSG00000116883.8 |
| 1:36822024 | Artery_Aorta                         | Other_conditions_of_brain                                                             | 10.02900263 | 3.450892471 | 11.06379168 | 0.825440099 | 0.832168885 | ENSG00000116883.8 |
| 1:36822024 | Artery_Tibial                        | Other_conditions_of_brain                                                             | 10.02900263 | 3.450892471 | 11.06379168 | 0.823869396 | 0.82907301  | ENSG00000116883.8 |
| 1:36822024 | Brain_Anterior_cingulate_cortex_BA24 | Other_conditions_of_brain                                                             | 10.02900263 | 3.450892471 | 11.06379168 | 0.824111156 | 0.829502004 | ENSG00000116883.8 |





|             |                                      |                                  |             |             |             |             |             |                   |        |
|-------------|--------------------------------------|----------------------------------|-------------|-------------|-------------|-------------|-------------|-------------------|--------|
| 1:36822024  | Heart_failure                        | Other_conditions_of_brain        | 10.02900263 | 3.450892471 | 11.06379168 | 0.827901768 | 0.834946004 | ENSG00000116883.8 | Testis |
| 1:36822024  | Heart_failure                        | Other_conditions_of_brain        | 10.02900263 | 3.450892471 | 11.06379168 | 0.823688195 | 0.829041786 | ENSG00000116883.8 |        |
| Thyroid     |                                      |                                  |             |             |             |             |             |                   |        |
| 1:36822024  | Heart_failure                        | Other_conditions_of_brain        | 10.02900263 | 3.450892471 | 11.06379168 | 0.857479637 | 0.831848993 | ENSG00000116883.8 |        |
| Whole_Blood |                                      |                                  |             |             |             |             |             |                   |        |
| 1:36822024  | Heart_failure                        | "Pain,_not_elsewhere_classified" | 10.02900263 | 4.151441428 | 11.45177304 | 0.824186361 | 0.886609146 | ENSG00000116883.8 |        |
|             | Adipose_Subcutaneous                 |                                  |             |             |             |             |             |                   |        |
| 1:36822024  | Heart_failure                        | "Pain,_not_elsewhere_classified" | 10.02900263 | 4.151441428 | 11.45177304 | 0.825823186 | 0.885732029 | ENSG00000116883.8 |        |
|             | Adipose_Visceral_Omentum             |                                  |             |             |             |             |             |                   |        |
| 1:36822024  | Heart_failure                        | "Pain,_not_elsewhere_classified" | 10.02900263 | 4.151441428 | 11.45177304 | 0.827085234 | 0.886916126 | ENSG00000116883.8 |        |
|             | Adrenal_Gland                        |                                  |             |             |             |             |             |                   |        |
| 1:36822024  | Heart_failure                        | "Pain,_not_elsewhere_classified" | 10.02900263 | 4.151441428 | 11.45177304 | 0.825440099 | 0.886433462 | ENSG00000116883.8 |        |
|             | Artery_Aorta                         |                                  |             |             |             |             |             |                   |        |
| 1:36822024  | Heart_failure                        | "Pain,_not_elsewhere_classified" | 10.02900263 | 4.151441428 | 11.45177304 | 0.823869396 | 0.886614057 | ENSG00000116883.8 |        |
|             | Artery_Tibial                        |                                  |             |             |             |             |             |                   |        |
| 1:36822024  | Heart_failure                        | "Pain,_not_elsewhere_classified" | 10.02900263 | 4.151441428 | 11.45177304 | 0.824111156 | 0.886687658 | ENSG00000116883.8 |        |
|             | Brain_Anterior_cingulate_cortex_BA24 |                                  |             |             |             |             |             |                   |        |
| 1:36822024  | Heart_failure                        | "Pain,_not_elsewhere_classified" | 10.02900263 | 4.151441428 | 11.45177304 | 0.876644748 | 0.903919773 | ENSG00000116883.8 |        |
|             | Brain_Caudate_basal_ganglia          |                                  |             |             |             |             |             |                   |        |
| 1:36822024  | Heart_failure                        | "Pain,_not_elsewhere_classified" | 10.02900263 | 4.151441428 | 11.45177304 | 0.935379322 | 0.919501793 | ENSG00000116883.8 |        |
|             | Brain_Cerebellar_Hemisphere          |                                  |             |             |             |             |             |                   |        |
| 1:36822024  | Heart_failure                        | "Pain,_not_elsewhere_classified" | 10.02900263 | 4.151441428 | 11.45177304 | 0.823945917 | 0.886615713 | ENSG00000116883.8 |        |
|             | Brain_Cerebellum                     |                                  |             |             |             |             |             |                   |        |
| 1:36822024  | Heart_failure                        | "Pain,_not_elsewhere_classified" | 10.02900263 | 4.151441428 | 11.45177304 | 0.828315817 | 0.887422977 | ENSG00000116883.8 |        |
|             | Brain_Cortex                         |                                  |             |             |             |             |             |                   |        |
| 1:36822024  | Heart_failure                        | "Pain,_not_elsewhere_classified" | 10.02900263 | 4.151441428 | 11.45177304 | 0.893335305 | 0.910938086 | ENSG00000116883.8 |        |
|             | Brain_Frontal_Cortex_BA9             |                                  |             |             |             |             |             |                   |        |
| 1:36822024  | Heart_failure                        | "Pain,_not_elsewhere_classified" | 10.02900263 | 4.151441428 | 11.45177304 | 0.831719039 | 0.889065966 | ENSG00000116883.8 |        |
|             | Brain_Hippocampus                    |                                  |             |             |             |             |             |                   |        |
| 1:36822024  | Heart_failure                        | "Pain,_not_elsewhere_classified" | 10.02900263 | 4.151441428 | 11.45177304 | 0.848285438 | 0.890636441 | ENSG00000116883.8 |        |
|             | Breast_Mammary_Tissue                |                                  |             |             |             |             |             |                   |        |
| 1:36822024  | Heart_failure                        | "Pain,_not_elsewhere_classified" | 10.02900263 | 4.151441428 | 11.45177304 | 0.823710476 | 0.886614956 | ENSG00000116883.8 |        |
|             | Cells_EBV-transformed_lymphocytes    |                                  |             |             |             |             |             |                   |        |
| 1:36822024  | Heart_failure                        | "Pain,_not_elsewhere_classified" | 10.02900263 | 4.151441428 | 11.45177304 | 0.823688495 | 0.886609621 | ENSG00000116883.8 |        |
|             | Cells_Transformed_fibroblasts        |                                  |             |             |             |             |             |                   |        |
| 1:36822024  | Heart_failure                        | "Pain,_not_elsewhere_classified" | 10.02900263 | 4.151441428 | 11.45177304 | 0.946331237 | 0.932262388 | ENSG00000142694.6 |        |
|             | Colon_Sigmoid                        | EVA1B                            |             |             |             |             |             |                   |        |
|             |                                      |                                  |             |             |             |             |             |                   |        |
| 1:36822024  | Heart_failure                        | "Pain,_not_elsewhere_classified" | 10.02900263 | 4.151441428 | 11.45177304 | 0.832516748 | 0.886823296 | ENSG00000116883.8 |        |
|             | Colon_Transverse                     |                                  |             |             |             |             |             |                   |        |
| 1:36822024  | Heart_failure                        | "Pain,_not_elsewhere_classified" | 10.02900263 | 4.151441428 | 11.45177304 | 0.961922917 | 0.906294166 | ENSG00000116883.8 |        |
|             | Esophagus_Gastroesophageal_Junction  |                                  |             |             |             |             |             |                   |        |
| 1:36822024  | Heart_failure                        | "Pain,_not_elsewhere_classified" | 10.02900263 | 4.151441428 | 11.45177304 | 0.823688195 | 0.886609649 | ENSG00000116883.8 |        |
|             | Esophagus_Mucosa                     |                                  |             |             |             |             |             |                   |        |
| 1:36822024  | Heart_failure                        | "Pain,_not_elsewhere_classified" | 10.02900263 | 4.151441428 | 11.45177304 | 0.824265193 | 0.886984178 | ENSG00000142694.6 |        |
|             | Esophagus_Muscularis                 | EVA1B                            |             |             |             |             |             |                   |        |
|             |                                      |                                  |             |             |             |             |             |                   |        |
| 1:36822024  | Heart_failure                        | "Pain,_not_elsewhere_classified" | 10.02900263 | 4.151441428 | 11.45177304 | 0.823688209 | 0.88660965  | ENSG00000116883.8 |        |
|             | Heart_Atrial_Appendage               |                                  |             |             |             |             |             |                   |        |
| 1:36822024  | Heart_failure                        | "Pain,_not_elsewhere_classified" | 10.02900263 | 4.151441428 | 11.45177304 | 0.823697275 | 0.886609425 | ENSG00000116883.8 |        |
|             | Heart_Left_Ventricle                 |                                  |             |             |             |             |             |                   |        |
| 1:36822024  | Heart_failure                        | "Pain,_not_elsewhere_classified" | 10.02900263 | 4.151441428 | 11.45177304 | 0.823688217 | 0.886609646 | ENSG00000116883.8 |        |
|             | Lung                                 |                                  |             |             |             |             |             |                   |        |

|            |                                      |                                                                                    |             |             |             |             |             |                   |
|------------|--------------------------------------|------------------------------------------------------------------------------------|-------------|-------------|-------------|-------------|-------------|-------------------|
| 1:36822024 | Heart_failure                        | "Pain,_not_elsewhere_classified"                                                   | 10.02900263 | 4.151441428 | 11.45177304 | 0.949811887 | 0.91954505  | ENSG00000054116.7 |
|            | Muscle_Skeletal                      | TRAPPC3 trafficking protein particle complex 3 [Source:HGNC Symbol;Acc:HGNC:19942] |             |             |             |             |             |                   |
| 1:36822024 | Heart_failure                        | "Pain,_not_elsewhere_classified"                                                   | 10.02900263 | 4.151441428 | 11.45177304 | 0.823692003 | 0.886609623 | ENSG00000116883.8 |
|            | Nerve_Tibial                         |                                                                                    |             |             |             |             |             |                   |
| 1:36822024 | Heart_failure                        | "Pain,_not_elsewhere_classified"                                                   | 10.02900263 | 4.151441428 | 11.45177304 | 0.855748575 | 0.882157489 | ENSG00000116883.8 |
|            | Pancreas                             |                                                                                    |             |             |             |             |             |                   |
| 1:36822024 | Heart_failure                        | "Pain,_not_elsewhere_classified"                                                   | 10.02900263 | 4.151441428 | 11.45177304 | 0.824541053 | 0.886593689 | ENSG00000116883.8 |
|            | Pituitary                            |                                                                                    |             |             |             |             |             |                   |
| 1:36822024 | Heart_failure                        | "Pain,_not_elsewhere_classified"                                                   | 10.02900263 | 4.151441428 | 11.45177304 | 0.823710661 | 0.88660793  | ENSG00000116883.8 |
|            | Skin_Not_Sun_Exposed_Suprapubic      |                                                                                    |             |             |             |             |             |                   |
| 1:36822024 | Heart_failure                        | "Pain,_not_elsewhere_classified"                                                   | 10.02900263 | 4.151441428 | 11.45177304 | 0.823688202 | 0.886609647 | ENSG00000116883.8 |
|            | Skin_Sun_Exposed_Lower_leg           |                                                                                    |             |             |             |             |             |                   |
| 1:36822024 | Heart_failure                        | "Pain,_not_elsewhere_classified"                                                   | 10.02900263 | 4.151441428 | 11.45177304 | 0.922295669 | 0.912396204 | ENSG00000116883.8 |
|            | Small_Intestine_Terminal_Ileum       |                                                                                    |             |             |             |             |             |                   |
| 1:36822024 | Heart_failure                        | "Pain,_not_elsewhere_classified"                                                   | 10.02900263 | 4.151441428 | 11.45177304 | 0.838977049 | 0.890268511 | ENSG00000116883.8 |
|            | Spleen                               |                                                                                    |             |             |             |             |             |                   |
| 1:36822024 | Heart_failure                        | "Pain,_not_elsewhere_classified"                                                   | 10.02900263 | 4.151441428 | 11.45177304 | 0.830082032 | 0.887281608 | ENSG00000116883.8 |
|            | Stomach                              |                                                                                    |             |             |             |             |             |                   |
| 1:36822024 | Heart_failure                        | "Pain,_not_elsewhere_classified"                                                   | 10.02900263 | 4.151441428 | 11.45177304 | 0.827901768 | 0.887657882 | ENSG00000116883.8 |
|            | Testis                               |                                                                                    |             |             |             |             |             |                   |
| 1:36822024 | Heart_failure                        | "Pain,_not_elsewhere_classified"                                                   | 10.02900263 | 4.151441428 | 11.45177304 | 0.823688195 | 0.886609649 | ENSG00000116883.8 |
|            | Thyroid                              |                                                                                    |             |             |             |             |             |                   |
| 1:36822024 | Heart_failure                        | "Pain,_not_elsewhere_classified"                                                   | 10.02900263 | 4.151441428 | 11.45177304 | 0.857479637 | 0.887557439 | ENSG00000116883.8 |
|            | Whole_Blood                          |                                                                                    |             |             |             |             |             |                   |
| 1:36822024 | Hypotension                          | Muscular_dystrophies_and_other_myopathies                                          | 8.659952682 | 4.921300364 | 10.69935888 | 0.893421796 | 0.920850775 | ENSG00000116883.8 |
|            | Adipose_Subcutaneous                 |                                                                                    |             |             |             |             |             |                   |
| 1:36822024 | Hypotension                          | Muscular_dystrophies_and_other_myopathies                                          | 8.659952682 | 4.921300364 | 10.69935888 | 0.894575321 | 0.92119375  | ENSG00000116883.8 |
|            | Adipose_Visceral_Omentum             |                                                                                    |             |             |             |             |             |                   |
| 1:36822024 | Hypotension                          | Muscular_dystrophies_and_other_myopathies                                          | 8.659952682 | 4.921300364 | 10.69935888 | 0.893563431 | 0.920938571 | ENSG00000116883.8 |
|            | Adrenal_Gland                        |                                                                                    |             |             |             |             |             |                   |
| 1:36822024 | Hypotension                          | Muscular_dystrophies_and_other_myopathies                                          | 8.659952682 | 4.921300364 | 10.69935888 | 0.893886286 | 0.920999584 | ENSG00000116883.8 |
|            | Artery_Aorta                         |                                                                                    |             |             |             |             |             |                   |
| 1:36822024 | Hypotension                          | Muscular_dystrophies_and_other_myopathies                                          | 8.659952682 | 4.921300364 | 10.69935888 | 0.893400932 | 0.920841474 | ENSG00000116883.8 |
|            | Artery_Tibial                        |                                                                                    |             |             |             |             |             |                   |
| 1:36822024 | Hypotension                          | Muscular_dystrophies_and_other_myopathies                                          | 8.659952682 | 4.921300364 | 10.69935888 | 0.893456411 | 0.920869003 | ENSG00000116883.8 |
|            | Brain_Anterior_cingulate_cortex_BA24 |                                                                                    |             |             |             |             |             |                   |
| 1:36822024 | Hypotension                          | Muscular_dystrophies_and_other_myopathies                                          | 8.659952682 | 4.921300364 | 10.69935888 | 0.919225606 | 0.927191334 | ENSG00000116883.8 |
|            | Brain_Caudate_basal_ganglia          |                                                                                    |             |             |             |             |             |                   |
| 1:36822024 | Hypotension                          | Muscular_dystrophies_and_other_myopathies                                          | 8.659952682 | 4.921300364 | 10.69935888 | 0.916516553 | 0.931081949 | ENSG00000116883.8 |
|            | Brain_Cerebellar_Hemisphere          |                                                                                    |             |             |             |             |             |                   |
| 1:36822024 | Hypotension                          | Muscular_dystrophies_and_other_myopathies                                          | 8.659952682 | 4.921300364 | 10.69935888 | 0.893400074 | 0.920841975 | ENSG00000116883.8 |
|            | Brain_Cerebellum                     |                                                                                    |             |             |             |             |             |                   |
| 1:36822024 | Hypotension                          | Muscular_dystrophies_and_other_myopathies                                          | 8.659952682 | 4.921300364 | 10.69935888 | 0.894166419 | 0.921176787 | ENSG00000116883.8 |
|            | Brain_Cortex                         |                                                                                    |             |             |             |             |             |                   |
| 1:36822024 | Hypotension                          | Muscular_dystrophies_and_other_myopathies                                          | 8.659952682 | 4.921300364 | 10.69935888 | 0.903440626 | 0.931036204 | ENSG00000116883.8 |
|            | Brain_Frontal_Cortex_BA9             |                                                                                    |             |             |             |             |             |                   |
| 1:36822024 | Hypotension                          | Muscular_dystrophies_and_other_myopathies                                          | 8.659952682 | 4.921300364 | 10.69935888 | 0.894819421 | 0.921507273 | ENSG00000116883.8 |
|            | Brain_Hippocampus                    |                                                                                    |             |             |             |             |             |                   |
| 1:36822024 | Hypotension                          | Muscular_dystrophies_and_other_myopathies                                          | 8.659952682 | 4.921300364 | 10.69935888 | 0.896755428 | 0.923590672 | ENSG00000116883.8 |
|            | Breast_Mammary_Tissue                |                                                                                    |             |             |             |             |             |                   |
| 1:36822024 | Hypotension                          | Muscular_dystrophies_and_other_myopathies                                          | 8.659952682 | 4.921300364 | 10.69935888 | 0.893402322 | 0.920840627 | ENSG00000116883.8 |
|            | Cells_EBV-transformed_lymphocytes    |                                                                                    |             |             |             |             |             |                   |

|                   |                                     |                                           |                                                                            |             |             |             |             |                   |
|-------------------|-------------------------------------|-------------------------------------------|----------------------------------------------------------------------------|-------------|-------------|-------------|-------------|-------------------|
| 1:36822024        | Hypotension                         | Muscular_dystrophies_and_other_myopathies | 8.659952682                                                                | 4.921300364 | 10.69935888 | 0.89339813  | 0.920838726 | ENSG00000116883.8 |
|                   | Cells_Transformed_fibroblasts       |                                           |                                                                            |             |             |             |             |                   |
| 1:36822024        | Hypotension                         | Muscular_dystrophies_and_other_myopathies | 8.659952682                                                                | 4.921300364 | 10.69935888 | 0.930225852 | 0.935620748 | ENSG00000142694.6 |
|                   | Colon_Sigmoid                       | EVA1B                                     | eva-1 homolog B [Source:HGNC Symbol;Acc:HGNC:25558]                        |             |             |             |             |                   |
| 1:36822024        | Hypotension                         | Muscular_dystrophies_and_other_myopathies | 8.659952682                                                                | 4.921300364 | 10.69935888 | 0.893468435 | 0.921044387 | ENSG00000116883.8 |
|                   | Colon_Transverse                    |                                           |                                                                            |             |             |             |             |                   |
| 1:36822024        | Hypotension                         | Muscular_dystrophies_and_other_myopathies | 8.659952682                                                                | 4.921300364 | 10.69935888 | 0.903209323 | 0.930131318 | ENSG00000116883.8 |
|                   | Esophagus_Gastroesophageal_Junction |                                           |                                                                            |             |             |             |             |                   |
| 1:36822024        | Hypotension                         | Muscular_dystrophies_and_other_myopathies | 8.659952682                                                                | 4.921300364 | 10.69935888 | 0.893398088 | 0.920838731 | ENSG00000116883.8 |
|                   | Esophagus_Mucosa                    |                                           |                                                                            |             |             |             |             |                   |
| 1:36822024        | Hypotension                         | Muscular_dystrophies_and_other_myopathies | 8.659952682                                                                | 4.921300364 | 10.69935888 | 0.894031897 | 0.920873651 | ENSG00000142694.6 |
|                   | Esophagus_Muscularis                | EVA1B                                     | eva-1 homolog B [Source:HGNC Symbol;Acc:HGNC:25558]                        |             |             |             |             |                   |
| 1:36822024        | Hypotension                         | Muscular_dystrophies_and_other_myopathies | 8.659952682                                                                | 4.921300364 | 10.69935888 | 0.893398087 | 0.920838734 | ENSG00000116883.8 |
|                   | Heart_Atrial_Appendage              |                                           |                                                                            |             |             |             |             |                   |
| 1:36822024        | Hypotension                         | Muscular_dystrophies_and_other_myopathies | 8.659952682                                                                | 4.921300364 | 10.69935888 | 0.893398764 | 0.920839701 | ENSG00000116883.8 |
|                   | Heart_Left_Ventricle                |                                           |                                                                            |             |             |             |             |                   |
| 1:36822024        | Hypotension                         | Muscular_dystrophies_and_other_myopathies | 8.659952682                                                                | 4.921300364 | 10.69935888 | 0.893398092 | 0.920838731 | ENSG00000116883.8 |
|                   | Lung                                |                                           |                                                                            |             |             |             |             |                   |
| 1:36822024        | Hypotension                         | Muscular_dystrophies_and_other_myopathies | 8.659952682                                                                | 4.921300364 | 10.69935888 | 0.939689938 | 0.940270926 | ENSG00000054116.7 |
|                   | Muscle_Skeletal                     | TRAPPC3                                   | trafficking protein particle complex 3 [Source:HGNC Symbol;Acc:HGNC:19942] |             |             |             |             |                   |
| 1:36822024        | Hypotension                         | Muscular_dystrophies_and_other_myopathies | 8.659952682                                                                | 4.921300364 | 10.69935888 | 0.893398201 | 0.92083881  | ENSG00000116883.8 |
|                   | Nerve_Tibial                        |                                           |                                                                            |             |             |             |             |                   |
| 1:36822024        | Hypotension                         | Muscular_dystrophies_and_other_myopathies | 8.659952682                                                                | 4.921300364 | 10.69935888 | 0.915638645 | 0.920239785 | ENSG00000116883.8 |
|                   | Pancreas                            |                                           |                                                                            |             |             |             |             |                   |
| 1:36822024        | Hypotension                         | Muscular_dystrophies_and_other_myopathies | 8.659952682                                                                | 4.921300364 | 10.69935888 | 0.893735911 | 0.920872258 | ENSG00000116883.8 |
|                   | Pituitary                           |                                           |                                                                            |             |             |             |             |                   |
| 1:36822024        | Hypotension                         | Muscular_dystrophies_and_other_myopathies | 8.659952682                                                                | 4.921300364 | 10.69935888 | 0.893400821 | 0.920838708 | ENSG00000116883.8 |
|                   | Skin_Not_Sun_Exposed_Suprapubic     |                                           |                                                                            |             |             |             |             |                   |
| 1:36822024        | Hypotension                         | Muscular_dystrophies_and_other_myopathies | 8.659952682                                                                | 4.921300364 | 10.69935888 | 0.893398091 | 0.920838732 | ENSG00000116883.8 |
|                   | Skin_Sun_Exposed_Lower_leg          |                                           |                                                                            |             |             |             |             |                   |
| 1:36822024        | Hypotension                         | Muscular_dystrophies_and_other_myopathies | 8.659952682                                                                | 4.921300364 | 10.69935888 | 0.909172015 | 0.929423492 | ENSG00000116883.8 |
|                   | Small_Intestine_Terminal_Ileum      |                                           |                                                                            |             |             |             |             |                   |
| 1:36822024        | Hypotension                         | Muscular_dystrophies_and_other_myopathies | 8.659952682                                                                | 4.921300364 | 10.69935888 | 0.896223351 | 0.922205276 | ENSG00000116883.8 |
|                   | Spleen                              |                                           |                                                                            |             |             |             |             |                   |
| 1:36822024        | Hypotension                         | Muscular_dystrophies_and_other_myopathies | 8.659952682                                                                | 4.921300364 | 10.69935888 | 0.893975956 | 0.921144174 | ENSG00000116883.8 |
|                   | Stomach                             |                                           |                                                                            |             |             |             |             |                   |
| 1:36822024        | Hypotension                         | Muscular_dystrophies_and_other_myopathies | 8.659952682                                                                | 4.921300364 | 10.69935888 | 0.892876    | 0.92195204  | ENSG00000116883.8 |
|                   | Testis                              |                                           |                                                                            |             |             |             |             |                   |
| 1:36822024        | Hypotension                         | Muscular_dystrophies_and_other_myopathies | 8.659952682                                                                | 4.921300364 | 10.69935888 | 0.893398088 | 0.920838731 | ENSG00000116883.8 |
|                   | Thyroid                             |                                           |                                                                            |             |             |             |             |                   |
| 1:36822024        | Hypotension                         | Muscular_dystrophies_and_other_myopathies | 8.659952682                                                                | 4.921300364 | 10.69935888 | 0.893775095 | 0.921332655 | ENSG00000116883.8 |
|                   | Whole_Blood                         |                                           |                                                                            |             |             |             |             |                   |
| 14:106995720      | Cardiac_dysrhythmias                | Muscular_dystrophies_and_other_myopathies | 11.3224843                                                                 | 4.393849818 | 12.98936123 | 0.92837185  | 0.974148193 |                   |
| ENSG00000211967.2 | Artery_Aorta                        | IGHV3-53                                  | immunoglobulin heavy variable 3-53 [Source:HGNC Symbol;Acc:HGNC:5610]      |             |             |             |             |                   |
| 14:106995720      | Cardiac_dysrhythmias                | Muscular_dystrophies_and_other_myopathies | 11.3224843                                                                 | 4.393849818 | 12.98936123 | 0.998714072 | 0.997654576 |                   |
| ENSG00000211965.2 | Colon_Transverse                    | IGHV3-49                                  | immunoglobulin heavy variable 3-49 [Source:HGNC Symbol;Acc:HGNC:5607]      |             |             |             |             |                   |
| 14:106995720      | Cardiac_dysrhythmias                | Muscular_dystrophies_and_other_myopathies | 11.3224843                                                                 | 4.393849818 | 12.98936123 | 0.994872958 | 0.993671896 |                   |
| ENSG00000211967.2 | Liver                               | IGHV3-53                                  | immunoglobulin heavy variable 3-53 [Source:HGNC Symbol;Acc:HGNC:5610]      |             |             |             |             |                   |
| 14:106995720      | Cardiac_dysrhythmias                | Muscular_dystrophies_and_other_myopathies | 11.3224843                                                                 | 4.393849818 | 12.98936123 | 0.969138352 | 0.964694562 |                   |
| ENSG00000211959.2 | Minor_Salivary_Gland                | IGHV4-39                                  | immunoglobulin heavy variable 4-39 [Source:HGNC Symbol;Acc:HGNC:5651]      |             |             |             |             |                   |
| 14:106995720      | Cardiac_dysrhythmias                | Muscular_dystrophies_and_other_myopathies | 11.3224843                                                                 | 4.393849818 | 12.98936123 | 0.999995634 | 0.99947653  |                   |
| ENSG00000211965.2 | Whole_Blood                         | IGHV3-49                                  | immunoglobulin heavy variable 3-49 [Source:HGNC Symbol;Acc:HGNC:5607]      |             |             |             |             |                   |

|                      |                          |                                                                       |                                                                       |             |             |             |             |                   |
|----------------------|--------------------------|-----------------------------------------------------------------------|-----------------------------------------------------------------------|-------------|-------------|-------------|-------------|-------------------|
| 14:106995720         | Cardiac_dysrhythmias     | Other_conditions_of_brain                                             | 11.3224843                                                            | 3.726246602 | 12.42038714 | 0.92837185  | 0.966439515 | ENSG00000211967.2 |
|                      | Artery_Aorta             | IGHV3-53                                                              | immunoglobulin heavy variable 3-53 [Source:HGNC Symbol;Acc:HGNC:5610] |             |             |             |             |                   |
| 14:106995720         | Cardiac_dysrhythmias     | Other_conditions_of_brain                                             | 11.3224843                                                            | 3.726246602 | 12.42038714 | 0.998714072 | 0.998390783 | ENSG00000211965.2 |
|                      | Colon_Transverse         | IGHV3-49                                                              | immunoglobulin heavy variable 3-49 [Source:HGNC Symbol;Acc:HGNC:5607] |             |             |             |             |                   |
| 14:106995720         | Cardiac_dysrhythmias     | Other_conditions_of_brain                                             | 11.3224843                                                            | 3.726246602 | 12.42038714 | 0.994872958 | 0.994646236 | ENSG00000211967.2 |
|                      | Liver                    | IGHV3-53                                                              | immunoglobulin heavy variable 3-53 [Source:HGNC Symbol;Acc:HGNC:5610] |             |             |             |             |                   |
| 14:106995720         | Cardiac_dysrhythmias     | Other_conditions_of_brain                                             | 11.3224843                                                            | 3.726246602 | 12.42038714 | 0.969138352 | 0.968404478 | ENSG00000211959.2 |
|                      | Minor_Salivary_Gland     | IGHV4-39                                                              | immunoglobulin heavy variable 4-39 [Source:HGNC Symbol;Acc:HGNC:5651] |             |             |             |             |                   |
| 14:106995720         | Cardiac_dysrhythmias     | Other_conditions_of_brain                                             | 11.3224843                                                            | 3.726246602 | 12.42038714 | 0.999995634 | 0.99983948  | ENSG00000211965.2 |
|                      | Whole_Blood              | IGHV3-49                                                              | immunoglobulin heavy variable 3-49 [Source:HGNC Symbol;Acc:HGNC:5607] |             |             |             |             |                   |
| 14:106995720         | Cardiac_dysrhythmias     | "Pain,_not_elsewhere_classified"                                      | 11.3224843                                                            | 6.297397159 | 14.25858429 | 0.92837185  | 0.928368756 |                   |
| ENSG00000211967.2    | Artery_Aorta             | IGHV3-53                                                              | immunoglobulin heavy variable 3-53 [Source:HGNC Symbol;Acc:HGNC:5610] |             |             |             |             |                   |
| 14:106995720         | Cardiac_dysrhythmias     | "Pain,_not_elsewhere_classified"                                      | 11.3224843                                                            | 6.297397159 | 14.25858429 | 0.998714072 | 0.998711172 |                   |
| ENSG00000211965.2    | Colon_Transverse         | IGHV3-49                                                              | immunoglobulin heavy variable 3-49 [Source:HGNC Symbol;Acc:HGNC:5607] |             |             |             |             |                   |
| 14:106995720         | Cardiac_dysrhythmias     | "Pain,_not_elsewhere_classified"                                      | 11.3224843                                                            | 6.297397159 | 14.25858429 | 0.994872958 | 0.99486555  |                   |
| ENSG00000211967.2    | Liver                    | IGHV3-53                                                              | immunoglobulin heavy variable 3-53 [Source:HGNC Symbol;Acc:HGNC:5610] |             |             |             |             |                   |
| 14:106995720         | Cardiac_dysrhythmias     | "Pain,_not_elsewhere_classified"                                      | 11.3224843                                                            | 6.297397159 | 14.25858429 | 0.969138352 | 0.969056723 |                   |
| ENSG00000211959.2    | Minor_Salivary_Gland     | IGHV4-39                                                              | immunoglobulin heavy variable 4-39 [Source:HGNC Symbol;Acc:HGNC:5651] |             |             |             |             |                   |
| 14:106995720         | Cardiac_dysrhythmias     | "Pain,_not_elsewhere_classified"                                      | 11.3224843                                                            | 6.297397159 | 14.25858429 | 0.999995634 | 0.999994313 |                   |
| ENSG00000211965.2    | Whole_Blood              | IGHV3-49                                                              | immunoglobulin heavy variable 3-49 [Source:HGNC Symbol;Acc:HGNC:5607] |             |             |             |             |                   |
| 14:106995720         | Essential_hypertension   | "Pain,_not_elsewhere_classified"                                      | 7.450506287                                                           | 6.297397159 | 10.61018457 | 0.991963294 | 0.969056723 |                   |
| ENSG00000211959.2    | Minor_Salivary_Gland     | IGHV4-39                                                              | immunoglobulin heavy variable 4-39 [Source:HGNC Symbol;Acc:HGNC:5651] |             |             |             |             |                   |
| 14:106995720         | Heart_failure            | Muscular_dystrophies_and_other_myopathies                             | 9.037678027                                                           | 4.393849818 | 10.75204015 | 0.982870586 | 0.89023493  | ENSG00000211959.2 |
|                      | Adipose_Visceral_Omentum | IGHV4-39                                                              | immunoglobulin heavy variable 4-39 [Source:HGNC Symbol;Acc:HGNC:5651] |             |             |             |             |                   |
| 14:106995720         | Heart_failure            | Muscular_dystrophies_and_other_myopathies                             | 9.037678027                                                           | 4.393849818 | 10.75204015 | 0.910169945 | 0.974148193 | ENSG00000211967.2 |
|                      | Artery_Aorta             | IGHV3-53                                                              | immunoglobulin heavy variable 3-53 [Source:HGNC Symbol;Acc:HGNC:5610] |             |             |             |             |                   |
| 14:106995720         | Heart_failure            | Muscular_dystrophies_and_other_myopathies                             | 9.037678027                                                           | 4.393849818 | 10.75204015 | 0.997906601 | 0.997654576 | ENSG00000211965.2 |
|                      | Colon_Transverse         | IGHV3-49                                                              | immunoglobulin heavy variable 3-49 [Source:HGNC Symbol;Acc:HGNC:5607] |             |             |             |             |                   |
| 14:106995720         | Heart_failure            | Muscular_dystrophies_and_other_myopathies                             | 9.037678027                                                           | 4.393849818 | 10.75204015 | 0.992743963 | 0.993671896 | ENSG00000211967.2 |
|                      | Liver                    | IGHV3-53                                                              | immunoglobulin heavy variable 3-53 [Source:HGNC Symbol;Acc:HGNC:5610] |             |             |             |             |                   |
| 14:106995720         | Heart_failure            | Muscular_dystrophies_and_other_myopathies                             | 9.037678027                                                           | 4.393849818 | 10.75204015 | 0.983230458 | 0.964694562 | ENSG00000211959.2 |
|                      | Minor_Salivary_Gland     | IGHV4-39                                                              | immunoglobulin heavy variable 4-39 [Source:HGNC Symbol;Acc:HGNC:5651] |             |             |             |             |                   |
| 14:106995720         | Heart_failure            | Muscular_dystrophies_and_other_myopathies                             | 9.037678027                                                           | 4.393849818 | 10.75204015 | 0.993975706 | 0.867164593 | ENSG00000228966.2 |
|                      | Testis                   | HOMER2P1                                                              | HOMER2 pseudogene 1 [Source:HGNC Symbol;Acc:HGNC:20336]               |             |             |             |             |                   |
| 14:106995720         | Heart_failure            | Muscular_dystrophies_and_other_myopathies                             | 9.037678027                                                           | 4.393849818 | 10.75204015 | 0.847704246 | 0.981353379 | ENSG00000211967.2 |
|                      | Thyroid                  | IGHV3-53                                                              | immunoglobulin heavy variable 3-53 [Source:HGNC Symbol;Acc:HGNC:5610] |             |             |             |             |                   |
| 14:106995720         | Heart_failure            | Muscular_dystrophies_and_other_myopathies                             | 9.037678027                                                           | 4.393849818 | 10.75204015 | 0.999639729 | 0.99947653  | ENSG00000211965.2 |
|                      | Whole_Blood              | IGHV3-49                                                              | immunoglobulin heavy variable 3-49 [Source:HGNC Symbol;Acc:HGNC:5607] |             |             |             |             |                   |
| 14:106995720         | Heart_failure            | Other_conditions_of_brain                                             | 9.037678027                                                           | 3.726246602 | 10.46888275 | 0.910169945 | 0.966439515 | ENSG00000211967.2 |
| Artery_Aorta         | IGHV3-53                 | immunoglobulin heavy variable 3-53 [Source:HGNC Symbol;Acc:HGNC:5610] |                                                                       |             |             |             |             |                   |
| 14:106995720         | Heart_failure            | Other_conditions_of_brain                                             | 9.037678027                                                           | 3.726246602 | 10.46888275 | 0.997906601 | 0.998390783 | ENSG00000211965.2 |
| Colon_Transverse     | IGHV3-49                 | immunoglobulin heavy variable 3-49 [Source:HGNC Symbol;Acc:HGNC:5607] |                                                                       |             |             |             |             |                   |
| 14:106995720         | Heart_failure            | Other_conditions_of_brain                                             | 9.037678027                                                           | 3.726246602 | 10.46888275 | 0.992743963 | 0.994646236 | ENSG00000211967.2 |
|                      | IGHV3-53                 | immunoglobulin heavy variable 3-53 [Source:HGNC Symbol;Acc:HGNC:5610] |                                                                       |             |             |             |             | Liver             |
| 14:106995720         | Heart_failure            | Other_conditions_of_brain                                             | 9.037678027                                                           | 3.726246602 | 10.46888275 | 0.983230458 | 0.968404478 | ENSG00000211959.2 |
| Minor_Salivary_Gland | IGHV4-39                 | immunoglobulin heavy variable 4-39 [Source:HGNC Symbol;Acc:HGNC:5651] |                                                                       |             |             |             |             |                   |
| 14:106995720         | Heart_failure            | Other_conditions_of_brain                                             | 9.037678027                                                           | 3.726246602 | 10.46888275 | 0.847704246 | 0.970891016 | ENSG00000211967.2 |
| Thyroid              | IGHV3-53                 | immunoglobulin heavy variable 3-53 [Source:HGNC Symbol;Acc:HGNC:5610] |                                                                       |             |             |             |             |                   |
| 14:106995720         | Heart_failure            | Other_conditions_of_brain                                             | 9.037678027                                                           | 3.726246602 | 10.46888275 | 0.999639729 | 0.99983948  | ENSG00000211965.2 |
| Whole_Blood          | IGHV3-49                 | immunoglobulin heavy variable 3-49 [Source:HGNC Symbol;Acc:HGNC:5607] |                                                                       |             |             |             |             |                   |
| 14:106995720         | Heart_failure            | "Pain,_not_elsewhere_classified"                                      | 9.037678027                                                           | 6.297397159 | 12.46533071 | 0.910169945 | 0.928368756 | ENSG00000211967.2 |
| Artery_Aorta         | IGHV3-53                 | immunoglobulin heavy variable 3-53 [Source:HGNC Symbol;Acc:HGNC:5610] |                                                                       |             |             |             |             |                   |

|              |                                                             |                                                                       |                                                                       |                                                                       |                                                                       |             |             |                   |       |
|--------------|-------------------------------------------------------------|-----------------------------------------------------------------------|-----------------------------------------------------------------------|-----------------------------------------------------------------------|-----------------------------------------------------------------------|-------------|-------------|-------------------|-------|
| 14:106995720 | Heart_failure                                               | "Pain,_not_elsewhere_classified"                                      | 9.037678027                                                           | 6.297397159                                                           | 12.46533071                                                           | 0.997906601 | 0.998711172 | ENSG00000211965.2 |       |
|              | Colon_Transverse                                            | IGHV3-49                                                              | immunoglobulin heavy variable 3-49 [Source:HGNC Symbol;Acc:HGNC:5607] |                                                                       |                                                                       |             |             |                   |       |
| 14:106995720 | Heart_failure                                               | "Pain,_not_elsewhere_classified"                                      | 9.037678027                                                           | 6.297397159                                                           | 12.46533071                                                           | 0.992743963 | 0.99486555  | ENSG00000211967.2 |       |
|              | Liver                                                       | IGHV3-53                                                              | immunoglobulin heavy variable 3-53 [Source:HGNC Symbol;Acc:HGNC:5610] |                                                                       |                                                                       |             |             |                   |       |
| 14:106995720 | Heart_failure                                               | "Pain,_not_elsewhere_classified"                                      | 9.037678027                                                           | 6.297397159                                                           | 12.46533071                                                           | 0.983230458 | 0.969056723 | ENSG00000211959.2 |       |
|              | Minor_Salivary_Gland                                        | IGHV4-39                                                              | immunoglobulin heavy variable 4-39 [Source:HGNC Symbol;Acc:HGNC:5651] |                                                                       |                                                                       |             |             |                   |       |
| 14:106995720 | Heart_failure                                               | "Pain,_not_elsewhere_classified"                                      | 9.037678027                                                           | 6.297397159                                                           | 12.46533071                                                           | 0.999639729 | 0.999994313 | ENSG00000211965.2 |       |
|              | Whole_Blood                                                 | IGHV3-49                                                              | immunoglobulin heavy variable 3-49 [Source:HGNC Symbol;Acc:HGNC:5607] |                                                                       |                                                                       |             |             |                   |       |
| 14:106995720 | Hypertensive_chronic_kidney_disease                         | "Pain,_not_elsewhere_classified"                                      |                                                                       |                                                                       | 8.115941353                                                           | 6.297397159 | 11.62323161 | 0.924956064       |       |
| 0.928368756  | ENSG00000211967.2                                           | Artery_Aorta                                                          | IGHV3-53                                                              | immunoglobulin heavy variable 3-53 [Source:HGNC Symbol;Acc:HGNC:5610] |                                                                       |             |             |                   |       |
| 14:106995720 | Hypertensive_chronic_kidney_disease                         | "Pain,_not_elsewhere_classified"                                      |                                                                       |                                                                       | 8.115941353                                                           | 6.297397159 | 11.62323161 | 0.998595293       |       |
| 0.998711172  | ENSG00000211965.2                                           | Colon_Transverse                                                      | IGHV3-49                                                              | immunoglobulin heavy variable 3-49 [Source:HGNC Symbol;Acc:HGNC:5607] |                                                                       |             |             |                   |       |
| 14:106995720 | Hypertensive_chronic_kidney_disease                         | "Pain,_not_elsewhere_classified"                                      |                                                                       |                                                                       | 8.115941353                                                           | 6.297397159 | 11.62323161 | 0.994565091       |       |
| 0.99486555   | ENSG00000211967.2                                           | Liver                                                                 | IGHV3-53                                                              | immunoglobulin heavy variable 3-53 [Source:HGNC Symbol;Acc:HGNC:5610] |                                                                       |             |             |                   |       |
| 14:106995720 | Hypertensive_chronic_kidney_disease                         | "Pain,_not_elsewhere_classified"                                      |                                                                       |                                                                       | 8.115941353                                                           | 6.297397159 | 11.62323161 | 0.968628319       |       |
| 0.969056723  | ENSG00000211959.2                                           | Minor_Salivary_Gland                                                  | IGHV4-39                                                              | immunoglobulin heavy variable 4-39 [Source:HGNC Symbol;Acc:HGNC:5651] |                                                                       |             |             |                   |       |
| 14:106995720 | Hypertensive_chronic_kidney_disease                         | "Pain,_not_elsewhere_classified"                                      |                                                                       |                                                                       | 8.115941353                                                           | 6.297397159 | 11.62323161 | 0.999942797       |       |
| 0.999994313  | ENSG00000211965.2                                           | Whole_Blood                                                           | IGHV3-49                                                              | immunoglobulin heavy variable 3-49 [Source:HGNC Symbol;Acc:HGNC:5607] |                                                                       |             |             |                   |       |
| 14:106995720 | Hypotension                                                 | Muscular_dystrophies_and_other_myopathies                             | 10.27818938                                                           | 4.393849818                                                           | 11.83198327                                                           | 0.928481711 | 0.974148193 | ENSG00000211967.2 |       |
|              | Artery_Aorta                                                | IGHV3-53                                                              | immunoglobulin heavy variable 3-53 [Source:HGNC Symbol;Acc:HGNC:5610] |                                                                       |                                                                       |             |             |                   |       |
| 14:106995720 | Hypotension                                                 | Muscular_dystrophies_and_other_myopathies                             | 10.27818938                                                           | 4.393849818                                                           | 11.83198327                                                           | 0.998718327 | 0.997654576 | ENSG00000211965.2 |       |
|              | Colon_Transverse                                            | IGHV3-49                                                              | immunoglobulin heavy variable 3-49 [Source:HGNC Symbol;Acc:HGNC:5607] |                                                                       |                                                                       |             |             |                   |       |
| 14:106995720 | Hypotension                                                 | Muscular_dystrophies_and_other_myopathies                             | 10.27818938                                                           | 4.393849818                                                           | 11.83198327                                                           | 0.994884193 | 0.993671896 | ENSG00000211967.2 |       |
|              | Liver                                                       | IGHV3-53                                                              | immunoglobulin heavy variable 3-53 [Source:HGNC Symbol;Acc:HGNC:5610] |                                                                       |                                                                       |             |             |                   |       |
| 14:106995720 | Hypotension                                                 | Muscular_dystrophies_and_other_myopathies                             | 10.27818938                                                           | 4.393849818                                                           | 11.83198327                                                           | 0.968990544 | 0.964694562 | ENSG00000211959.2 |       |
|              | Minor_Salivary_Gland                                        | IGHV4-39                                                              | immunoglobulin heavy variable 4-39 [Source:HGNC Symbol;Acc:HGNC:5651] |                                                                       |                                                                       |             |             |                   |       |
| 14:106995720 | Hypotension                                                 | Muscular_dystrophies_and_other_myopathies                             | 10.27818938                                                           | 4.393849818                                                           | 11.83198327                                                           | 0.999997508 | 0.99947653  | ENSG00000211965.2 |       |
|              | Whole_Blood                                                 | IGHV3-49                                                              | immunoglobulin heavy variable 3-49 [Source:HGNC Symbol;Acc:HGNC:5607] |                                                                       |                                                                       |             |             |                   |       |
| 14:106995720 | Hypotension                                                 | Other_conditions_of_brain                                             | 10.27818938                                                           | 3.726246602                                                           | 11.25183254                                                           | 0.928481711 | 0.966439515 | ENSG00000211967.2 |       |
|              | Artery_Aorta                                                | IGHV3-53                                                              | immunoglobulin heavy variable 3-53 [Source:HGNC Symbol;Acc:HGNC:5610] |                                                                       |                                                                       |             |             |                   |       |
| 14:106995720 | Hypotension                                                 | Other_conditions_of_brain                                             | 10.27818938                                                           | 3.726246602                                                           | 11.25183254                                                           | 0.998718327 | 0.998390783 | ENSG00000211965.2 |       |
|              | Colon_Transverse                                            | IGHV3-49                                                              | immunoglobulin heavy variable 3-49 [Source:HGNC Symbol;Acc:HGNC:5607] |                                                                       |                                                                       |             |             |                   |       |
| 14:106995720 | Hypotension                                                 | Other_conditions_of_brain                                             | 10.27818938                                                           | 3.726246602                                                           | 11.25183254                                                           | 0.994884193 | 0.994646236 | ENSG00000211967.2 | Liver |
|              | IGHV3-53                                                    | immunoglobulin heavy variable 3-53 [Source:HGNC Symbol;Acc:HGNC:5610] |                                                                       |                                                                       |                                                                       |             |             |                   |       |
| 14:106995720 | Hypotension                                                 | Other_conditions_of_brain                                             | 10.27818938                                                           | 3.726246602                                                           | 11.25183254                                                           | 0.968990544 | 0.968404478 | ENSG00000211959.2 |       |
|              | Minor_Salivary_Gland                                        | IGHV4-39                                                              | immunoglobulin heavy variable 4-39 [Source:HGNC Symbol;Acc:HGNC:5651] |                                                                       |                                                                       |             |             |                   |       |
| 14:106995720 | Hypotension                                                 | Other_conditions_of_brain                                             | 10.27818938                                                           | 3.726246602                                                           | 11.25183254                                                           | 0.999997508 | 0.99983948  | ENSG00000211965.2 |       |
|              | Whole_Blood                                                 | IGHV3-49                                                              | immunoglobulin heavy variable 3-49 [Source:HGNC Symbol;Acc:HGNC:5607] |                                                                       |                                                                       |             |             |                   |       |
| 14:106995720 | Hypotension                                                 | "Pain,_not_elsewhere_classified"                                      | 10.27818938                                                           | 6.297397159                                                           | 13.00391372                                                           | 0.928481711 | 0.928368756 | ENSG00000211967.2 |       |
|              | Artery_Aorta                                                | IGHV3-53                                                              | immunoglobulin heavy variable 3-53 [Source:HGNC Symbol;Acc:HGNC:5610] |                                                                       |                                                                       |             |             |                   |       |
| 14:106995720 | Hypotension                                                 | "Pain,_not_elsewhere_classified"                                      | 10.27818938                                                           | 6.297397159                                                           | 13.00391372                                                           | 0.998718327 | 0.998711172 | ENSG00000211965.2 |       |
|              | Colon_Transverse                                            | IGHV3-49                                                              | immunoglobulin heavy variable 3-49 [Source:HGNC Symbol;Acc:HGNC:5607] |                                                                       |                                                                       |             |             |                   |       |
| 14:106995720 | Hypotension                                                 | "Pain,_not_elsewhere_classified"                                      | 10.27818938                                                           | 6.297397159                                                           | 13.00391372                                                           | 0.994884193 | 0.99486555  | ENSG00000211967.2 |       |
|              | Liver                                                       | IGHV3-53                                                              | immunoglobulin heavy variable 3-53 [Source:HGNC Symbol;Acc:HGNC:5610] |                                                                       |                                                                       |             |             |                   |       |
| 14:106995720 | Hypotension                                                 | "Pain,_not_elsewhere_classified"                                      | 10.27818938                                                           | 6.297397159                                                           | 13.00391372                                                           | 0.968990544 | 0.969056723 | ENSG00000211959.2 |       |
|              | Minor_Salivary_Gland                                        | IGHV4-39                                                              | immunoglobulin heavy variable 4-39 [Source:HGNC Symbol;Acc:HGNC:5651] |                                                                       |                                                                       |             |             |                   |       |
| 14:106995720 | Hypotension                                                 | "Pain,_not_elsewhere_classified"                                      | 10.27818938                                                           | 6.297397159                                                           | 13.00391372                                                           | 0.999997508 | 0.999994313 | ENSG00000211965.2 |       |
|              | Whole_Blood                                                 | IGHV3-49                                                              | immunoglobulin heavy variable 3-49 [Source:HGNC Symbol;Acc:HGNC:5607] |                                                                       |                                                                       |             |             |                   |       |
| 14:106995720 | Ill-defined_descriptions_and_complications_of_heart_disease | "Pain,_not_elsewhere_classified"                                      |                                                                       |                                                                       | 7.610479534                                                           | 6.297397159 | 11.22438904 |                   |       |
| 0.992140706  | 0.969056723                                                 | ENSG00000211959.2                                                     | Minor_Salivary_Gland                                                  | IGHV4-39                                                              | immunoglobulin heavy variable 4-39 [Source:HGNC Symbol;Acc:HGNC:5651] |             |             |                   |       |
| 22:22876236  | Other_forms_of_chronic_ischemic_heart_disease               | Inflammatory_and_toxic_neuropathy                                     |                                                                       |                                                                       | 4.98505965                                                            | 14.21112488 | 14.70245184 | 0.838820638       |       |

|                   |                                |                                                                             |                                                                             |             |             |             |             |                   |  |        |
|-------------------|--------------------------------|-----------------------------------------------------------------------------|-----------------------------------------------------------------------------|-------------|-------------|-------------|-------------|-------------------|--|--------|
| 0.807884123       | ENSG00000273342.1              | Brain_Cerebellum                                                            |                                                                             |             |             |             |             |                   |  |        |
| 22:22947156       | Cardiac_dysrhythmias           | Inflammatory_and_toxic_neuropathy                                           |                                                                             | 10.9303319  | 3.011396457 | 11.23613196 | 0.862347038 | 0.827904651       |  |        |
| ENSG00000273342.1 |                                | Brain_Cerebellum                                                            |                                                                             |             |             |             |             |                   |  |        |
| 22:22947156       | Cardiac_dysrhythmias           | Muscular_dystrophies_and_other_myopathies                                   |                                                                             | 10.9303319  | 3.773201679 | 12.11570961 | 0.862347038 | 0.861810944       |  |        |
| ENSG00000273342.1 |                                | Brain_Cerebellum                                                            |                                                                             |             |             |             |             |                   |  |        |
| 22:22947156       | Cardiac_dysrhythmias           | Other_conditions_of_brain                                                   | 10.9303319                                                                  | 3.328289484 | 11.73760519 | 0.862347038 | 0.861536557 | ENSG00000273342.1 |  |        |
|                   | Brain_Cerebellum               |                                                                             |                                                                             |             |             |             |             |                   |  |        |
| 22:22947156       | Cardiac_dysrhythmias           | "Pain,_not_elsewhere_classified"                                            |                                                                             | 10.9303319  | 5.622147581 | 13.34820358 | 0.862347038 | 0.832373002       |  |        |
| ENSG00000273342.1 |                                | Brain_Cerebellum                                                            |                                                                             |             |             |             |             |                   |  |        |
| 22:22947156       | Cardiomyopathy                 | Inflammatory_and_toxic_neuropathy                                           | 12.32993978                                                                 | 3.011396457 | 12.81808952 | 0.961374298 | 0.930268964 | ENSG00000272779.1 |  |        |
|                   | Cells_Transformed_fibroblasts  |                                                                             |                                                                             |             |             |             |             |                   |  |        |
| 22:22947156       | Cardiomyopathy                 | Inflammatory_and_toxic_neuropathy                                           | 12.32993978                                                                 | 3.011396457 | 12.81808952 | 0.999580102 | 0.898967216 | ENSG00000100121.8 |  |        |
|                   | Testis                         | GGTLC2                                                                      | gamma-glutamyltransferase light chain 2 [Source:HGNC Symbol;Acc:HGNC:18596] |             |             |             |             |                   |  |        |
| 22:22947156       | Cardiomyopathy                 | Muscular_dystrophies_and_other_myopathies                                   | 12.32993978                                                                 | 3.773201679 | 13.76791504 | 0.961374298 | 0.928094716 | ENSG00000272779.1 |  |        |
|                   | Cells_Transformed_fibroblasts  |                                                                             |                                                                             |             |             |             |             |                   |  |        |
| 22:22947156       | Cardiomyopathy                 | Muscular_dystrophies_and_other_myopathies                                   | 12.32993978                                                                 | 3.773201679 | 13.76791504 | 0.801617101 | 0.889230965 | ENSG00000211662.2 |  |        |
|                   | Small_Intestine_Terminal_Ileum | IGLV3-21                                                                    | immunoglobulin lambda variable 3-21 [Source:HGNC Symbol;Acc:HGNC:5905]      |             |             |             |             |                   |  |        |
| 22:22947156       | Cardiomyopathy                 | Muscular_dystrophies_and_other_myopathies                                   | 12.32993978                                                                 | 3.773201679 | 13.76791504 | 0.999580102 | 0.997565797 | ENSG00000100121.8 |  |        |
|                   | Testis                         | GGTLC2                                                                      | gamma-glutamyltransferase light chain 2 [Source:HGNC Symbol;Acc:HGNC:18596] |             |             |             |             |                   |  |        |
| 22:22947156       | Cardiomyopathy                 | Other_conditions_of_brain                                                   | 12.32993978                                                                 | 3.328289484 | 13.50732662 | 0.961374298 | 0.88245145  | ENSG00000272779.1 |  |        |
|                   | Cells_Transformed_fibroblasts  |                                                                             |                                                                             |             |             |             |             |                   |  |        |
| 22:22947156       | Cardiomyopathy                 | Other_conditions_of_brain                                                   | 12.32993978                                                                 | 3.328289484 | 13.50732662 | 0.999580102 | 0.993790351 | ENSG00000100121.8 |  | Testis |
|                   | GGTLC2                         | gamma-glutamyltransferase light chain 2 [Source:HGNC Symbol;Acc:HGNC:18596] |                                                                             |             |             |             |             |                   |  |        |
| 22:22947156       | Cardiomyopathy                 | "Pain,_not_elsewhere_classified"                                            | 12.32993978                                                                 | 5.622147581 | 15.50329771 | 0.961374298 | 0.945444061 | ENSG00000272779.1 |  |        |
|                   | Cells_Transformed_fibroblasts  |                                                                             |                                                                             |             |             |             |             |                   |  |        |
| 22:22947156       | Cardiomyopathy                 | "Pain,_not_elsewhere_classified"                                            | 12.32993978                                                                 | 5.622147581 | 15.50329771 | 0.999580102 | 0.998924202 | ENSG00000100121.8 |  |        |
|                   | Testis                         | GGTLC2                                                                      | gamma-glutamyltransferase light chain 2 [Source:HGNC Symbol;Acc:HGNC:18596] |             |             |             |             |                   |  |        |
| 22:22947156       | Essential_hypertension         | Muscular_dystrophies_and_other_myopathies                                   | 10.18661919                                                                 | 3.773201679 | 11.37995411 | 0.966899413 | 0.861810944 |                   |  |        |
| ENSG00000273342.1 |                                | Brain_Cerebellum                                                            |                                                                             |             |             |             |             |                   |  |        |
| 22:22947156       | Essential_hypertension         | Muscular_dystrophies_and_other_myopathies                                   | 10.18661919                                                                 | 3.773201679 | 11.37995411 | 0.999985389 | 0.943309909 |                   |  |        |
| ENSG00000215456.5 | Thyroid                        | BCRP4                                                                       | breakpoint cluster region pseudogene 4 [Source:HGNC Symbol;Acc:HGNC:1017]   |             |             |             |             |                   |  |        |
| 22:22947156       | Essential_hypertension         | Other_conditions_of_brain                                                   | 10.18661919                                                                 | 3.328289484 | 10.96801846 | 0.966899413 | 0.861536557 | ENSG00000273342.1 |  |        |
|                   | Brain_Cerebellum               |                                                                             |                                                                             |             |             |             |             |                   |  |        |
| 22:22947156       | Essential_hypertension         | "Pain,_not_elsewhere_classified"                                            |                                                                             | 10.18661919 | 5.622147581 | 12.38622609 | 0.966899413 | 0.832373002       |  |        |
| ENSG00000273342.1 |                                | Brain_Cerebellum                                                            |                                                                             |             |             |             |             |                   |  |        |
| 22:22947156       | Heart_failure                  | Inflammatory_and_toxic_neuropathy                                           | 20.62069448                                                                 | 3.011396457 | 19.80701225 | 0.961659883 | 0.930268964 | ENSG00000272779.1 |  |        |
|                   | Cells_Transformed_fibroblasts  |                                                                             |                                                                             |             |             |             |             |                   |  |        |
| 22:22947156       | Heart_failure                  | Inflammatory_and_toxic_neuropathy                                           | 20.62069448                                                                 | 3.011396457 | 19.80701225 | 0.999588562 | 0.898967216 | ENSG00000100121.8 |  |        |
|                   | Testis                         | GGTLC2                                                                      | gamma-glutamyltransferase light chain 2 [Source:HGNC Symbol;Acc:HGNC:18596] |             |             |             |             |                   |  |        |
| 22:22947156       | Heart_failure                  | Muscular_dystrophies_and_other_myopathies                                   | 20.62069448                                                                 | 3.773201679 | 20.96258476 | 0.961659883 | 0.928094716 | ENSG00000272779.1 |  |        |
|                   | Cells_Transformed_fibroblasts  |                                                                             |                                                                             |             |             |             |             |                   |  |        |
| 22:22947156       | Heart_failure                  | Muscular_dystrophies_and_other_myopathies                                   | 20.62069448                                                                 | 3.773201679 | 20.96258476 | 0.802297914 | 0.889230965 | ENSG00000211662.2 |  |        |
|                   | Small_Intestine_Terminal_Ileum | IGLV3-21                                                                    | immunoglobulin lambda variable 3-21 [Source:HGNC Symbol;Acc:HGNC:5905]      |             |             |             |             |                   |  |        |
| 22:22947156       | Heart_failure                  | Muscular_dystrophies_and_other_myopathies                                   | 20.62069448                                                                 | 3.773201679 | 20.96258476 | 0.999588562 | 0.997565797 | ENSG00000100121.8 |  |        |
|                   | Testis                         | GGTLC2                                                                      | gamma-glutamyltransferase light chain 2 [Source:HGNC Symbol;Acc:HGNC:18596] |             |             |             |             |                   |  |        |
| 22:22947156       | Heart_failure                  | Other_conditions_of_brain                                                   | 20.62069448                                                                 | 3.328289484 | 21.00012475 | 0.961659883 | 0.88245145  | ENSG00000272779.1 |  |        |
|                   | Cells_Transformed_fibroblasts  |                                                                             |                                                                             |             |             |             |             |                   |  |        |
| 22:22947156       | Heart_failure                  | Other_conditions_of_brain                                                   | 20.62069448                                                                 | 3.328289484 | 21.00012475 | 0.999588562 | 0.993790351 | ENSG00000100121.8 |  | Testis |
|                   | GGTLC2                         | gamma-glutamyltransferase light chain 2 [Source:HGNC Symbol;Acc:HGNC:18596] |                                                                             |             |             |             |             |                   |  |        |
| 22:22947156       | Heart_failure                  | "Pain,_not_elsewhere_classified"                                            | 20.62069448                                                                 | 5.622147581 | 22.55303013 | 0.961659883 | 0.945444061 | ENSG00000272779.1 |  |        |
|                   | Cells_Transformed_fibroblasts  |                                                                             |                                                                             |             |             |             |             |                   |  |        |
| 22:22947156       | Heart_failure                  | "Pain,_not_elsewhere_classified"                                            | 20.62069448                                                                 | 5.622147581 | 22.55303013 | 0.999588562 | 0.998924202 | ENSG00000100121.8 |  |        |

|                   |                                                             |                                                                             |                                                                             |                                                                             |                                                                             |             |             |                   |                   |
|-------------------|-------------------------------------------------------------|-----------------------------------------------------------------------------|-----------------------------------------------------------------------------|-----------------------------------------------------------------------------|-----------------------------------------------------------------------------|-------------|-------------|-------------------|-------------------|
| 22:22947156       | Testis                                                      | GGTLC2                                                                      | gamma-glutamyltransferase light chain 2 [Source:HGNC Symbol;Acc:HGNC:18596] |                                                                             |                                                                             |             |             |                   |                   |
| 0.861810944       | Hypertensive_chronic_kidney_disease                         | ENSG00000273342.1                                                           | Muscular_dystrophies_and_other_myopathies                                   | 9.331427731                                                                 | 3.773201679                                                                 | 10.76035767 | 0.932898127 |                   |                   |
| 22:22947156       | Hypertensive_chronic_kidney_disease                         |                                                                             | Muscular_dystrophies_and_other_myopathies                                   | 9.331427731                                                                 | 3.773201679                                                                 | 10.76035767 | 0.880298856 |                   |                   |
| 0.997565797       | ENSG00000100121.8                                           | Testis                                                                      | GGTLC2                                                                      | gamma-glutamyltransferase light chain 2 [Source:HGNC Symbol;Acc:HGNC:18596] |                                                                             |             |             |                   |                   |
| 22:22947156       | Hypertensive_chronic_kidney_disease                         |                                                                             | "Pain,_not_elsewhere_classified"                                            | 9.331427731                                                                 | 5.622147581                                                                 | 12.11940887 | 0.932898127 |                   |                   |
| 0.832373002       | ENSG00000273342.1                                           | Brain_Cerebellum                                                            |                                                                             |                                                                             |                                                                             |             |             |                   |                   |
| 22:22947156       | Hypertensive_chronic_kidney_disease                         |                                                                             | "Pain,_not_elsewhere_classified"                                            | 9.331427731                                                                 | 5.622147581                                                                 | 12.11940887 | 0.880298856 |                   |                   |
| 0.998924202       | ENSG00000100121.8                                           | Testis                                                                      | GGTLC2                                                                      | gamma-glutamyltransferase light chain 2 [Source:HGNC Symbol;Acc:HGNC:18596] |                                                                             |             |             |                   |                   |
| 22:22947156       | Hypotension                                                 | Muscular_dystrophies_and_other_myopathies                                   | 9.777543663                                                                 | 3.773201679                                                                 | 10.88343585                                                                 | 0.954011513 | 0.928094716 | ENSG00000272779.1 |                   |
|                   | Cells_Transformed_fibroblasts                               |                                                                             |                                                                             |                                                                             |                                                                             |             |             |                   |                   |
| 22:22947156       | Hypotension                                                 | Muscular_dystrophies_and_other_myopathies                                   | 9.777543663                                                                 | 3.773201679                                                                 | 10.88343585                                                                 | 0.999280898 | 0.997565797 | ENSG00000100121.8 |                   |
|                   | Testis                                                      | GGTLC2                                                                      | gamma-glutamyltransferase light chain 2 [Source:HGNC Symbol;Acc:HGNC:18596] |                                                                             |                                                                             |             |             |                   |                   |
| 22:22947156       | Hypotension                                                 | Other_conditions_of_brain                                                   | 9.777543663                                                                 | 3.328289484                                                                 | 10.4905755                                                                  | 0.954011513 | 0.88245145  | ENSG00000272779.1 |                   |
|                   | Cells_Transformed_fibroblasts                               |                                                                             |                                                                             |                                                                             |                                                                             |             |             |                   |                   |
| 22:22947156       | Hypotension                                                 | Other_conditions_of_brain                                                   | 9.777543663                                                                 | 3.328289484                                                                 | 10.4905755                                                                  | 0.999280898 | 0.993790351 | ENSG00000100121.8 | Testis            |
|                   | GGTLC2                                                      | gamma-glutamyltransferase light chain 2 [Source:HGNC Symbol;Acc:HGNC:18596] |                                                                             |                                                                             |                                                                             |             |             |                   |                   |
| 22:22947156       | Hypotension                                                 | "Pain,_not_elsewhere_classified"                                            | 9.777543663                                                                 | 5.622147581                                                                 | 12.02553449                                                                 | 0.954011513 | 0.945444061 | ENSG00000272779.1 |                   |
|                   | Cells_Transformed_fibroblasts                               |                                                                             |                                                                             |                                                                             |                                                                             |             |             |                   |                   |
| 22:22947156       | Hypotension                                                 | "Pain,_not_elsewhere_classified"                                            | 9.777543663                                                                 | 5.622147581                                                                 | 12.02553449                                                                 | 0.999280898 | 0.998924202 | ENSG00000100121.8 |                   |
|                   | Testis                                                      | GGTLC2                                                                      | gamma-glutamyltransferase light chain 2 [Source:HGNC Symbol;Acc:HGNC:18596] |                                                                             |                                                                             |             |             |                   |                   |
| 22:22947156       | Ill-defined_descriptions_and_complications_of_heart_disease | ENSG00000273342.1                                                           | Inflammatory_and_toxic_neuropathy                                           |                                                                             | 10.66494348                                                                 | 3.011396457 | 10.86252885 |                   |                   |
| 0.924262219       | 0.827904651                                                 | Brain_Cerebellum                                                            |                                                                             |                                                                             |                                                                             |             |             |                   |                   |
| 22:22947156       | Ill-defined_descriptions_and_complications_of_heart_disease |                                                                             | Inflammatory_and_toxic_neuropathy                                           |                                                                             | 10.66494348                                                                 | 3.011396457 | 10.86252885 |                   |                   |
| 0.840548392       | 0.898967216                                                 | ENSG00000100121.8                                                           | Testis                                                                      | GGTLC2                                                                      | gamma-glutamyltransferase light chain 2 [Source:HGNC Symbol;Acc:HGNC:18596] |             |             |                   |                   |
| 22:22947156       | Ill-defined_descriptions_and_complications_of_heart_disease |                                                                             | Muscular_dystrophies_and_other_myopathies                                   |                                                                             | 10.66494348                                                                 | 3.773201679 | 11.70293624 |                   |                   |
| 0.924262219       | 0.861810944                                                 | ENSG00000273342.1                                                           | Brain_Cerebellum                                                            |                                                                             |                                                                             |             |             |                   |                   |
| 22:22947156       | Ill-defined_descriptions_and_complications_of_heart_disease |                                                                             | Muscular_dystrophies_and_other_myopathies                                   |                                                                             | 10.66494348                                                                 | 3.773201679 | 11.70293624 |                   |                   |
| 0.840548392       | 0.997565797                                                 | ENSG00000100121.8                                                           | Testis                                                                      | GGTLC2                                                                      | gamma-glutamyltransferase light chain 2 [Source:HGNC Symbol;Acc:HGNC:18596] |             |             |                   |                   |
| 22:22947156       | Ill-defined_descriptions_and_complications_of_heart_disease |                                                                             | Other_conditions_of_brain                                                   |                                                                             | 10.66494348                                                                 | 3.328289484 | 11.47833144 | 0.924262219       |                   |
| 0.861536557       | ENSG00000273342.1                                           | Brain_Cerebellum                                                            |                                                                             |                                                                             |                                                                             |             |             |                   |                   |
| 22:22947156       | Ill-defined_descriptions_and_complications_of_heart_disease |                                                                             | Other_conditions_of_brain                                                   |                                                                             | 10.66494348                                                                 | 3.328289484 | 11.47833144 | 0.840548392       |                   |
| 0.993790351       | ENSG00000100121.8                                           | Testis                                                                      | GGTLC2                                                                      | gamma-glutamyltransferase light chain 2 [Source:HGNC Symbol;Acc:HGNC:18596] |                                                                             |             |             |                   |                   |
| 22:22947156       | Ill-defined_descriptions_and_complications_of_heart_disease |                                                                             | "Pain,_not_elsewhere_classified"                                            |                                                                             | 10.66494348                                                                 | 5.622147581 | 13.38474466 |                   |                   |
| 0.924262219       | 0.832373002                                                 | ENSG00000273342.1                                                           | Brain_Cerebellum                                                            |                                                                             |                                                                             |             |             |                   |                   |
| 22:22947156       | Ill-defined_descriptions_and_complications_of_heart_disease |                                                                             | "Pain,_not_elsewhere_classified"                                            |                                                                             | 10.66494348                                                                 | 5.622147581 | 13.38474466 |                   |                   |
| 0.840548392       | 0.998924202                                                 | ENSG00000100121.8                                                           | Testis                                                                      | GGTLC2                                                                      | gamma-glutamyltransferase light chain 2 [Source:HGNC Symbol;Acc:HGNC:18596] |             |             |                   |                   |
| 22:22947156       | Other_diseases_of_endocardium                               | Inflammatory_and_toxic_neuropathy                                           |                                                                             | 10.3397988                                                                  | 3.011396457                                                                 | 11.03169888 | 0.862483376 | 0.827904651       |                   |
| ENSG00000273342.1 | Brain_Cerebellum                                            |                                                                             |                                                                             |                                                                             |                                                                             |             |             |                   |                   |
| 22:22947156       | Other_diseases_of_endocardium                               | Muscular_dystrophies_and_other_myopathies                                   |                                                                             | 10.3397988                                                                  | 3.773201679                                                                 | 11.84408412 | 0.862483376 | 0.861810944       |                   |
| ENSG00000273342.1 | Brain_Cerebellum                                            |                                                                             |                                                                             |                                                                             |                                                                             |             |             |                   |                   |
| 22:22947156       | Other_diseases_of_endocardium                               | Other_conditions_of_brain                                                   |                                                                             | 10.3397988                                                                  | 3.328289484                                                                 | 11.6169238  | 0.862483376 | 0.861536557       | ENSG00000273342.1 |
|                   | Brain_Cerebellum                                            |                                                                             |                                                                             |                                                                             |                                                                             |             |             |                   |                   |
| 22:22947156       | Other_diseases_of_endocardium                               | "Pain,_not_elsewhere_classified"                                            |                                                                             | 10.3397988                                                                  | 5.622147581                                                                 | 13.62710637 | 0.862483376 | 0.832373002       |                   |
| ENSG00000273342.1 | Brain_Cerebellum                                            |                                                                             |                                                                             |                                                                             |                                                                             |             |             |                   |                   |
| 22:22947156       | Other_forms_of_chronic_ischemic_heart_disease               | Inflammatory_and_toxic_neuropathy                                           |                                                                             | 11.87321942                                                                 | 3.011396457                                                                 | 11.33536282 | 0.856370052 |                   |                   |
| 0.827904651       | ENSG00000273342.1                                           | Brain_Cerebellum                                                            |                                                                             |                                                                             |                                                                             |             |             |                   |                   |
| 22:22947156       | Other_forms_of_chronic_ischemic_heart_disease               | Muscular_dystrophies_and_other_myopathies                                   |                                                                             | 11.87321942                                                                 | 3.773201679                                                                 | 12.69012444 | 0.856370052 |                   |                   |
| 0.861810944       | ENSG00000273342.1                                           | Brain_Cerebellum                                                            |                                                                             |                                                                             |                                                                             |             |             |                   |                   |
| 22:22947156       | Other_forms_of_chronic_ischemic_heart_disease               | Other_conditions_of_brain                                                   |                                                                             | 11.87321942                                                                 | 3.328289484                                                                 | 12.53000777 | 0.856370052 | 0.861536557       |                   |
| ENSG00000273342.1 | Brain_Cerebellum                                            |                                                                             |                                                                             |                                                                             |                                                                             |             |             |                   |                   |
| 22:22947156       | Other_forms_of_chronic_ischemic_heart_disease               | "Pain,_not_elsewhere_classified"                                            |                                                                             | 11.87321942                                                                 | 5.622147581                                                                 | 14.16764446 | 0.856370052 |                   |                   |

|                    |                                       |                                   |                                                       |                                     |             |             |             |             |                   |
|--------------------|---------------------------------------|-----------------------------------|-------------------------------------------------------|-------------------------------------|-------------|-------------|-------------|-------------|-------------------|
| 0.832373002        | ENSG00000273342.1                     | Brain_Cerebellum                  |                                                       |                                     |             |             |             |             |                   |
| 22:25420792        | Cardiac_dysrhythmias                  | Inflammatory_and_toxic_neuropathy |                                                       | 9.527975302                         | 4.158515391 | 10.81690509 | 0.833201113 | 0.860550889 |                   |
| ENSG00000197077.8  | Brain_Caudate_basal_ganglia           | KIAA1671                          | KIAA1671                                              | [Source:HGNC Symbol;Acc:HGNC:29345] |             |             |             |             |                   |
| 22:25420792        | Cardiac_dysrhythmias                  | Inflammatory_and_toxic_neuropathy |                                                       | 9.527975302                         | 4.158515391 | 10.81690509 | 0.807377073 | 0.821974686 |                   |
| ENSG00000167037.14 | Brain_Cerebellum                      | SGSM1                             | small G protein signaling modulator 1                 | [Source:HGNC Symbol;Acc:HGNC:29410] |             |             |             |             |                   |
| 22:25420792        | Cardiac_dysrhythmias                  | Inflammatory_and_toxic_neuropathy |                                                       | 9.527975302                         | 4.158515391 | 10.81690509 | 0.948129036 | 0.855195631 |                   |
| ENSG00000197077.8  | Brain_Frontal_Cortex_BA9              | KIAA1671                          | KIAA1671                                              | [Source:HGNC Symbol;Acc:HGNC:29345] |             |             |             |             |                   |
| 22:25420792        | Cardiac_dysrhythmias                  | Inflammatory_and_toxic_neuropathy |                                                       | 9.527975302                         | 4.158515391 | 10.81690509 | 0.834095153 | 0.834363764 |                   |
| ENSG00000244752.2  | Brain_Nucleus_accumbens_basal_ganglia | CRYBB2                            | crystallin beta B2                                    | [Source:HGNC Symbol;Acc:HGNC:2398]  |             |             |             |             |                   |
| 22:25420792        | Cardiac_dysrhythmias                  | Inflammatory_and_toxic_neuropathy |                                                       | 9.527975302                         | 4.158515391 | 10.81690509 | 0.895692301 | 0.814043283 |                   |
| ENSG00000100053.5  | Colon_Sigmoid                         | CRYBB3                            | crystallin beta B3                                    | [Source:HGNC Symbol;Acc:HGNC:2400]  |             |             |             |             |                   |
| 22:25420792        | Cardiac_dysrhythmias                  | Inflammatory_and_toxic_neuropathy |                                                       | 9.527975302                         | 4.158515391 | 10.81690509 | 0.998120592 | 0.842325117 |                   |
| ENSG00000197077.8  | Esophagus_Muscularis                  | KIAA1671                          | KIAA1671                                              | [Source:HGNC Symbol;Acc:HGNC:29345] |             |             |             |             |                   |
| 22:25420792        | Cardiac_dysrhythmias                  | Inflammatory_and_toxic_neuropathy |                                                       | 9.527975302                         | 4.158515391 | 10.81690509 | 0.890336043 | 0.817127847 |                   |
| ENSG00000100053.5  | Heart_Left_Ventricle                  | CRYBB3                            | crystallin beta B3                                    | [Source:HGNC Symbol;Acc:HGNC:2400]  |             |             |             |             |                   |
| 22:25420792        | Cardiac_dysrhythmias                  | Inflammatory_and_toxic_neuropathy |                                                       | 9.527975302                         | 4.158515391 | 10.81690509 | 0.817406791 | 0.815168263 |                   |
| ENSG00000100053.5  | Minor_Salivary_Gland                  | CRYBB3                            | crystallin beta B3                                    | [Source:HGNC Symbol;Acc:HGNC:2400]  |             |             |             |             |                   |
| 22:25420792        | Cardiac_dysrhythmias                  | Inflammatory_and_toxic_neuropathy |                                                       | 9.527975302                         | 4.158515391 | 10.81690509 | 0.844966845 | 0.916361063 |                   |
| ENSG00000203280.3  | Muscle_Skeletal                       |                                   |                                                       |                                     |             |             |             |             |                   |
| 22:25420792        | Cardiac_dysrhythmias                  | Inflammatory_and_toxic_neuropathy |                                                       | 9.527975302                         | 4.158515391 | 10.81690509 | 0.994339693 | 0.878054589 |                   |
| ENSG00000206066.3  | Pituitary                             | IGLL3P                            | "immunoglobulin lambda like polypeptide 3, pseudogene | [Source:HGNC Symbol;Acc:HGNC:5872]" |             |             |             |             |                   |
| 22:25420792        | Cardiac_dysrhythmias                  | Inflammatory_and_toxic_neuropathy |                                                       | 9.527975302                         | 4.158515391 | 10.81690509 | 0.835241853 | 0.910673588 |                   |
| ENSG00000197077.8  | Spleen                                | KIAA1671                          | KIAA1671                                              | [Source:HGNC Symbol;Acc:HGNC:29345] |             |             |             |             |                   |
| 22:25420792        | Cardiac_dysrhythmias                  | Organic_sleep_disorders           |                                                       | 9.527975302                         | 4.165897344 | 10.68704589 | 0.994339693 | 0.819523064 | ENSG00000206066.3 |
| 22:25420792        | Pituitary                             | IGLL3P                            | "immunoglobulin lambda like polypeptide 3, pseudogene | [Source:HGNC Symbol;Acc:HGNC:5872]" |             |             |             |             |                   |
| 22:25420792        | Cardiac_dysrhythmias                  | "Pain,_not_elsewhere_classified"  |                                                       | 9.527975302                         | 4.589729036 | 11.24691124 | 0.833201113 | 0.815985454 |                   |
| ENSG00000197077.8  | Brain_Caudate_basal_ganglia           | KIAA1671                          | KIAA1671                                              | [Source:HGNC Symbol;Acc:HGNC:29345] |             |             |             |             |                   |
| 22:25420792        | Cardiac_dysrhythmias                  | "Pain,_not_elsewhere_classified"  |                                                       | 9.527975302                         | 4.589729036 | 11.24691124 | 0.948129036 | 0.822297702 |                   |
| ENSG00000197077.8  | Brain_Frontal_Cortex_BA9              | KIAA1671                          | KIAA1671                                              | [Source:HGNC Symbol;Acc:HGNC:29345] |             |             |             |             |                   |
| 22:25420792        | Cardiac_dysrhythmias                  | "Pain,_not_elsewhere_classified"  |                                                       | 9.527975302                         | 4.589729036 | 11.24691124 | 0.998120592 | 0.855272772 |                   |
| ENSG00000197077.8  | Esophagus_Muscularis                  | KIAA1671                          | KIAA1671                                              | [Source:HGNC Symbol;Acc:HGNC:29345] |             |             |             |             |                   |
| 22:25420792        | Cardiac_dysrhythmias                  | "Pain,_not_elsewhere_classified"  |                                                       | 9.527975302                         | 4.589729036 | 11.24691124 | 0.844966845 | 0.822797976 |                   |
| ENSG00000203280.3  | Muscle_Skeletal                       |                                   |                                                       |                                     |             |             |             |             |                   |
| 22:25420792        | Cardiac_dysrhythmias                  | "Pain,_not_elsewhere_classified"  |                                                       | 9.527975302                         | 4.589729036 | 11.24691124 | 0.994339693 | 0.887106515 |                   |
| ENSG00000206066.3  | Pituitary                             | IGLL3P                            | "immunoglobulin lambda like polypeptide 3, pseudogene | [Source:HGNC Symbol;Acc:HGNC:5872]" |             |             |             |             |                   |
| 22:25420792        | Cardiac_dysrhythmias                  | "Pain,_not_elsewhere_classified"  |                                                       | 9.527975302                         | 4.589729036 | 11.24691124 | 0.835241853 | 0.827638289 |                   |
| ENSG00000197077.8  | Spleen                                | KIAA1671                          | KIAA1671                                              | [Source:HGNC Symbol;Acc:HGNC:29345] |             |             |             |             |                   |
| 22:25420792        | Essential_hypertension                | Inflammatory_and_toxic_neuropathy |                                                       | 12.16178078                         | 4.158515391 | 12.61977232 | 0.829691124 | 0.813735841 |                   |
| ENSG00000203280.3  | Adrenal_Gland                         |                                   |                                                       |                                     |             |             |             |             |                   |
| 22:25420792        | Essential_hypertension                | Inflammatory_and_toxic_neuropathy |                                                       | 12.16178078                         | 4.158515391 | 12.61977232 | 0.90664169  | 0.860550889 |                   |
| ENSG00000197077.8  | Brain_Caudate_basal_ganglia           | KIAA1671                          | KIAA1671                                              | [Source:HGNC Symbol;Acc:HGNC:29345] |             |             |             |             |                   |
| 22:25420792        | Essential_hypertension                | Inflammatory_and_toxic_neuropathy |                                                       | 12.16178078                         | 4.158515391 | 12.61977232 | 0.832687293 | 0.805992438 |                   |
| ENSG00000167037.14 | Brain_Cerebellar_Hemisphere           | SGSM1                             | small G protein signaling modulator 1                 | [Source:HGNC Symbol;Acc:HGNC:29410] |             |             |             |             |                   |
| 22:25420792        | Essential_hypertension                | Inflammatory_and_toxic_neuropathy |                                                       | 12.16178078                         | 4.158515391 | 12.61977232 | 0.823361192 | 0.821974686 |                   |
| ENSG00000167037.14 | Brain_Cerebellum                      | SGSM1                             | small G protein signaling modulator 1                 | [Source:HGNC Symbol;Acc:HGNC:29410] |             |             |             |             |                   |
| 22:25420792        | Essential_hypertension                | Inflammatory_and_toxic_neuropathy |                                                       | 12.16178078                         | 4.158515391 | 12.61977232 | 0.873715279 | 0.855195631 |                   |
| ENSG00000197077.8  | Brain_Frontal_Cortex_BA9              | KIAA1671                          | KIAA1671                                              | [Source:HGNC Symbol;Acc:HGNC:29345] |             |             |             |             |                   |
| 22:25420792        | Essential_hypertension                | Inflammatory_and_toxic_neuropathy |                                                       | 12.16178078                         | 4.158515391 | 12.61977232 | 0.854637762 | 0.834363764 |                   |
| ENSG00000244752.2  | Brain_Nucleus_accumbens_basal_ganglia | CRYBB2                            | crystallin beta B2                                    | [Source:HGNC Symbol;Acc:HGNC:2398]  |             |             |             |             |                   |
| 22:25420792        | Essential_hypertension                | Inflammatory_and_toxic_neuropathy |                                                       | 12.16178078                         | 4.158515391 | 12.61977232 | 0.832203451 | 0.814043283 |                   |
| ENSG00000100053.5  | Colon_Sigmoid                         | CRYBB3                            | crystallin beta B3                                    | [Source:HGNC Symbol;Acc:HGNC:2400]  |             |             |             |             |                   |
| 22:25420792        | Essential_hypertension                | Inflammatory_and_toxic_neuropathy |                                                       | 12.16178078                         | 4.158515391 | 12.61977232 | 0.864229318 | 0.842325117 |                   |



|                   |                                                  |                                   |                                                                                           |             |             |             |             |                    |  |
|-------------------|--------------------------------------------------|-----------------------------------|-------------------------------------------------------------------------------------------|-------------|-------------|-------------|-------------|--------------------|--|
| ENSG00000197077.8 | Esophagus_Muscularis                             | KIAA1671                          | KIAA1671 [Source:HGNC Symbol;Acc:HGNC:29345]                                              |             |             |             |             |                    |  |
| 22:25420792       | Essential_hypertension                           | Inflammatory_and_toxic_neuropathy | 12.16178078                                                                               | 4.158515391 | 12.61977232 | 0.819859638 | 0.817127847 |                    |  |
| ENSG00000100053.5 | Heart_Left_Ventricle                             | CRYBB3                            | crystallin beta B3 [Source:HGNC Symbol;Acc:HGNC:2400]                                     |             |             |             |             |                    |  |
| 22:25420792       | Essential_hypertension                           | Inflammatory_and_toxic_neuropathy | 12.16178078                                                                               | 4.158515391 | 12.61977232 | 0.824681504 | 0.815168263 |                    |  |
| ENSG00000100053.5 | Minor_Salivary_Gland                             | CRYBB3                            | crystallin beta B3 [Source:HGNC Symbol;Acc:HGNC:2400]                                     |             |             |             |             |                    |  |
| 22:25420792       | Essential_hypertension                           | Inflammatory_and_toxic_neuropathy | 12.16178078                                                                               | 4.158515391 | 12.61977232 | 0.822102294 | 0.916361063 |                    |  |
| ENSG00000203280.3 | Muscle_Skeletal                                  |                                   |                                                                                           |             |             |             |             |                    |  |
| 22:25420792       | Essential_hypertension                           | Inflammatory_and_toxic_neuropathy | 12.16178078                                                                               | 4.158515391 | 12.61977232 | 0.881258675 | 0.878054589 |                    |  |
| ENSG00000206066.3 | Pituitary                                        | IGLL3P                            | "immunoglobulin lambda like polypeptide 3, pseudogene [Source:HGNC Symbol;Acc:HGNC:5872]" |             |             |             |             |                    |  |
| 22:25420792       | Essential_hypertension                           | Inflammatory_and_toxic_neuropathy | 12.16178078                                                                               | 4.158515391 | 12.61977232 | 0.822042826 | 0.839815851 |                    |  |
| ENSG00000215481.4 | Prostate                                         | BCRP3                             | breakpoint cluster region pseudogene 3 [Source:HGNC Symbol;Acc:HGNC:1016]                 |             |             |             |             |                    |  |
| 22:25420792       | Essential_hypertension                           | Inflammatory_and_toxic_neuropathy | 12.16178078                                                                               | 4.158515391 | 12.61977232 | 0.844864854 | 0.910673588 |                    |  |
| ENSG00000197077.8 | Spleen                                           | KIAA1671                          | KIAA1671 [Source:HGNC Symbol;Acc:HGNC:29345]                                              |             |             |             |             |                    |  |
| 22:25420792       | Essential_hypertension                           | Inflammatory_and_toxic_neuropathy | 12.16178078                                                                               | 4.158515391 | 12.61977232 | 0.815412283 | 0.815987103 |                    |  |
| ENSG00000197077.8 | Thyroid                                          | KIAA1671                          | KIAA1671 [Source:HGNC Symbol;Acc:HGNC:29345]                                              |             |             |             |             |                    |  |
| 22:25420792       | Essential_hypertension                           | Inflammatory_and_toxic_neuropathy | 12.16178078                                                                               | 4.158515391 | 12.61977232 | 0.840071877 | 0.902895237 |                    |  |
| ENSG00000197077.8 | Whole_Blood                                      | KIAA1671                          | KIAA1671 [Source:HGNC Symbol;Acc:HGNC:29345]                                              |             |             |             |             |                    |  |
| 22:25420792       | Essential_hypertension                           | Organic_sleep_disorders           | 12.16178078                                                                               | 4.165897344 | 12.52057703 | 0.881258675 | 0.819523064 | ENSG00000206066.3  |  |
|                   | Pituitary                                        | IGLL3P                            | "immunoglobulin lambda like polypeptide 3, pseudogene [Source:HGNC Symbol;Acc:HGNC:5872]" |             |             |             |             |                    |  |
| 22:25420792       | Essential_hypertension                           | "Pain,_not_elsewhere_classified"  | 12.16178078                                                                               | 4.589729036 | 13.28449825 | 0.90664169  | 0.815985454 |                    |  |
| ENSG00000197077.8 | Brain_Caudate_basal_ganglia                      | KIAA1671                          | KIAA1671 [Source:HGNC Symbol;Acc:HGNC:29345]                                              |             |             |             |             |                    |  |
| 22:25420792       | Essential_hypertension                           | "Pain,_not_elsewhere_classified"  | 12.16178078                                                                               | 4.589729036 | 13.28449825 | 0.873715279 | 0.822297702 |                    |  |
| ENSG00000197077.8 | Brain_Frontal_Cortex_BA9                         | KIAA1671                          | KIAA1671 [Source:HGNC Symbol;Acc:HGNC:29345]                                              |             |             |             |             |                    |  |
| 22:25420792       | Essential_hypertension                           | "Pain,_not_elsewhere_classified"  | 12.16178078                                                                               | 4.589729036 | 13.28449825 | 0.864229318 | 0.855272772 |                    |  |
| ENSG00000197077.8 | Esophagus_Muscularis                             | KIAA1671                          | KIAA1671 [Source:HGNC Symbol;Acc:HGNC:29345]                                              |             |             |             |             |                    |  |
| 22:25420792       | Essential_hypertension                           | "Pain,_not_elsewhere_classified"  | 12.16178078                                                                               | 4.589729036 | 13.28449825 | 0.822102294 | 0.822797976 |                    |  |
| ENSG00000203280.3 | Muscle_Skeletal                                  |                                   |                                                                                           |             |             |             |             |                    |  |
| 22:25420792       | Essential_hypertension                           | "Pain,_not_elsewhere_classified"  | 12.16178078                                                                               | 4.589729036 | 13.28449825 | 0.881258675 | 0.887106515 |                    |  |
| ENSG00000206066.3 | Pituitary                                        | IGLL3P                            | "immunoglobulin lambda like polypeptide 3, pseudogene [Source:HGNC Symbol;Acc:HGNC:5872]" |             |             |             |             |                    |  |
| 22:25420792       | Essential_hypertension                           | "Pain,_not_elsewhere_classified"  | 12.16178078                                                                               | 4.589729036 | 13.28449825 | 0.844864854 | 0.827638289 |                    |  |
| ENSG00000197077.8 | Spleen                                           | KIAA1671                          | KIAA1671 [Source:HGNC Symbol;Acc:HGNC:29345]                                              |             |             |             |             |                    |  |
| 22:25420792       | Essential_hypertension                           | "Pain,_not_elsewhere_classified"  | 12.16178078                                                                               | 4.589729036 | 13.28449825 | 0.840071877 | 0.80958797  |                    |  |
| ENSG00000197077.8 | Whole_Blood                                      | KIAA1671                          | KIAA1671 [Source:HGNC Symbol;Acc:HGNC:29345]                                              |             |             |             |             |                    |  |
| 22:25436904       | Angina_pectoris "Pain,_not_elsewhere_classified" |                                   | 3.066816521                                                                               | 13.33771448 | 15.0151603  | 0.803785817 | 0.812459886 | ENSG00000197077.8  |  |
|                   | Brain_Caudate_basal_ganglia                      | KIAA1671                          | KIAA1671 [Source:HGNC Symbol;Acc:HGNC:29345]                                              |             |             |             |             |                    |  |
| 22:25436904       | Angina_pectoris "Pain,_not_elsewhere_classified" |                                   | 3.066816521                                                                               | 13.33771448 | 15.0151603  | 0.833634952 | 0.853604618 | ENSG00000167037.14 |  |
|                   | Brain_Cerebellar_Hemisphere                      | SGSM1                             | small G protein signaling modulator 1 [Source:HGNC Symbol;Acc:HGNC:29410]                 |             |             |             |             |                    |  |
| 22:25436904       | Angina_pectoris "Pain,_not_elsewhere_classified" |                                   | 3.066816521                                                                               | 13.33771448 | 15.0151603  | 0.814319116 | 0.818956592 | ENSG00000197077.8  |  |
|                   | Brain_Frontal_Cortex_BA9                         | KIAA1671                          | KIAA1671 [Source:HGNC Symbol;Acc:HGNC:29345]                                              |             |             |             |             |                    |  |
| 22:25436904       | Angina_pectoris "Pain,_not_elsewhere_classified" |                                   | 3.066816521                                                                               | 13.33771448 | 15.0151603  | 0.877465017 | 0.851857735 | ENSG00000197077.8  |  |
|                   | Esophagus_Muscularis                             | KIAA1671                          | KIAA1671 [Source:HGNC Symbol;Acc:HGNC:29345]                                              |             |             |             |             |                    |  |
| 22:25436904       | Angina_pectoris "Pain,_not_elsewhere_classified" |                                   | 3.066816521                                                                               | 13.33771448 | 15.0151603  | 0.885921011 | 0.882101333 | ENSG00000206066.3  |  |
|                   | Pituitary                                        | IGLL3P                            | "immunoglobulin lambda like polypeptide 3, pseudogene [Source:HGNC Symbol;Acc:HGNC:5872]" |             |             |             |             |                    |  |
| 22:25436904       | Angina_pectoris "Pain,_not_elsewhere_classified" |                                   | 3.066816521                                                                               | 13.33771448 | 15.0151603  | 0.845443929 | 0.824009591 | ENSG00000197077.8  |  |
|                   | Spleen                                           | KIAA1671                          | KIAA1671 [Source:HGNC Symbol;Acc:HGNC:29345]                                              |             |             |             |             |                    |  |
| 22:25436904       | Angina_pectoris "Pain,_not_elsewhere_classified" |                                   | 3.066816521                                                                               | 13.33771448 | 15.0151603  | 0.801214307 | 0.806059713 | ENSG00000197077.8  |  |
|                   | Whole_Blood                                      | KIAA1671                          | KIAA1671 [Source:HGNC Symbol;Acc:HGNC:29345]                                              |             |             |             |             |                    |  |
| 22:25436904       | Atherosclerosis "Pain,_not_elsewhere_classified" |                                   | 5.074584763                                                                               | 13.33771448 | 15.58004076 | 0.833086344 | 0.812459886 | ENSG00000197077.8  |  |
|                   | Brain_Caudate_basal_ganglia                      | KIAA1671                          | KIAA1671 [Source:HGNC Symbol;Acc:HGNC:29345]                                              |             |             |             |             |                    |  |
| 22:25436904       | Atherosclerosis "Pain,_not_elsewhere_classified" |                                   | 5.074584763                                                                               | 13.33771448 | 15.58004076 | 0.910077573 | 0.853604618 | ENSG00000167037.14 |  |
|                   | Brain_Cerebellar_Hemisphere                      | SGSM1                             | small G protein signaling modulator 1 [Source:HGNC Symbol;Acc:HGNC:29410]                 |             |             |             |             |                    |  |
| 22:25436904       | Atherosclerosis "Pain,_not_elsewhere_classified" |                                   | 5.074584763                                                                               | 13.33771448 | 15.58004076 | 0.921596285 | 0.818956592 | ENSG00000197077.8  |  |

|                    |                                                  |                                  |                                                                                           |             |             |             |             |             |                    |  |
|--------------------|--------------------------------------------------|----------------------------------|-------------------------------------------------------------------------------------------|-------------|-------------|-------------|-------------|-------------|--------------------|--|
| 22:25436904        | Brain_Frontal_Cortex_BA9                         | KIAA1671                         | KIAA1671 [Source:HGNC Symbol;Acc:HGNC:29345]                                              |             |             |             |             |             |                    |  |
|                    | Atherosclerosis "Pain,_not_elsewhere_classified" |                                  |                                                                                           | 5.074584763 | 13.33771448 | 15.58004076 | 0.892223386 | 0.851857735 | ENSG00000197077.8  |  |
|                    | Esophagus_Muscularis                             | KIAA1671                         | KIAA1671 [Source:HGNC Symbol;Acc:HGNC:29345]                                              |             |             |             |             |             |                    |  |
| 22:25436904        | Atherosclerosis "Pain,_not_elsewhere_classified" |                                  |                                                                                           | 5.074584763 | 13.33771448 | 15.58004076 | 0.854396566 | 0.818499042 | ENSG00000203280.3  |  |
|                    | Muscle_Skeletal                                  |                                  |                                                                                           |             |             |             |             |             |                    |  |
| 22:25436904        | Atherosclerosis "Pain,_not_elsewhere_classified" |                                  |                                                                                           | 5.074584763 | 13.33771448 | 15.58004076 | 0.885051571 | 0.882101333 | ENSG00000206066.3  |  |
|                    | Pituitary                                        | IGLL3P                           | "immunoglobulin lambda like polypeptide 3, pseudogene [Source:HGNC Symbol;Acc:HGNC:5872]" |             |             |             |             |             |                    |  |
| 22:25436904        | Atherosclerosis "Pain,_not_elsewhere_classified" |                                  |                                                                                           | 5.074584763 | 13.33771448 | 15.58004076 | 0.811931035 | 0.824009591 | ENSG00000197077.8  |  |
|                    | Spleen                                           | KIAA1671                         | KIAA1671 [Source:HGNC Symbol;Acc:HGNC:29345]                                              |             |             |             |             |             |                    |  |
| 22:25436904        | Atherosclerosis "Pain,_not_elsewhere_classified" |                                  |                                                                                           | 5.074584763 | 13.33771448 | 15.58004076 | 0.808914828 | 0.806059713 | ENSG00000197077.8  |  |
|                    | Whole_Blood                                      | KIAA1671                         | KIAA1671 [Source:HGNC Symbol;Acc:HGNC:29345]                                              |             |             |             |             |             |                    |  |
| 22:25436904        | Cardiac_dysrhythmias                             | "Pain,_not_elsewhere_classified" |                                                                                           | 11.9314431  | 13.33771448 | 20.87189598 | 0.832570229 | 0.812459886 |                    |  |
| ENSG00000197077.8  | Brain_Caudate_basal_ganglia                      | KIAA1671                         | KIAA1671 [Source:HGNC Symbol;Acc:HGNC:29345]                                              |             |             |             |             |             |                    |  |
| 22:25436904        | Cardiac_dysrhythmias                             | "Pain,_not_elsewhere_classified" |                                                                                           | 11.9314431  | 13.33771448 | 20.87189598 | 0.858153961 | 0.853604618 |                    |  |
| ENSG00000167037.14 | Brain_Cerebellar_Hemisphere                      | SGSM1                            | small G protein signaling modulator 1 [Source:HGNC Symbol;Acc:HGNC:29410]                 |             |             |             |             |             |                    |  |
| 22:25436904        | Cardiac_dysrhythmias                             | "Pain,_not_elsewhere_classified" |                                                                                           | 11.9314431  | 13.33771448 | 20.87189598 | 0.948133923 | 0.818956592 |                    |  |
| ENSG00000197077.8  | Brain_Frontal_Cortex_BA9                         | KIAA1671                         | KIAA1671 [Source:HGNC Symbol;Acc:HGNC:29345]                                              |             |             |             |             |             |                    |  |
| 22:25436904        | Cardiac_dysrhythmias                             | "Pain,_not_elsewhere_classified" |                                                                                           | 11.9314431  | 13.33771448 | 20.87189598 | 0.998146568 | 0.851857735 |                    |  |
| ENSG00000197077.8  | Esophagus_Muscularis                             | KIAA1671                         | KIAA1671 [Source:HGNC Symbol;Acc:HGNC:29345]                                              |             |             |             |             |             |                    |  |
| 22:25436904        | Cardiac_dysrhythmias                             | "Pain,_not_elsewhere_classified" |                                                                                           | 11.9314431  | 13.33771448 | 20.87189598 | 0.845973215 | 0.818499042 |                    |  |
| ENSG00000203280.3  | Muscle_Skeletal                                  |                                  |                                                                                           |             |             |             |             |             |                    |  |
| 22:25436904        | Cardiac_dysrhythmias                             | "Pain,_not_elsewhere_classified" |                                                                                           | 11.9314431  | 13.33771448 | 20.87189598 | 0.994052299 | 0.882101333 |                    |  |
| ENSG00000206066.3  | Pituitary                                        | IGLL3P                           | "immunoglobulin lambda like polypeptide 3, pseudogene [Source:HGNC Symbol;Acc:HGNC:5872]" |             |             |             |             |             |                    |  |
| 22:25436904        | Cardiac_dysrhythmias                             | "Pain,_not_elsewhere_classified" |                                                                                           | 11.9314431  | 13.33771448 | 20.87189598 | 0.835004599 | 0.824009591 |                    |  |
| ENSG00000197077.8  | Spleen                                           | KIAA1671                         | KIAA1671 [Source:HGNC Symbol;Acc:HGNC:29345]                                              |             |             |             |             |             |                    |  |
| 22:25436904        | Cardiomyopathy "Pain,_not_elsewhere_classified"  |                                  |                                                                                           | 4.938547521 | 13.33771448 | 15.90400179 | 0.848105322 | 0.812459886 | ENSG00000197077.8  |  |
|                    | Brain_Caudate_basal_ganglia                      | KIAA1671                         | KIAA1671 [Source:HGNC Symbol;Acc:HGNC:29345]                                              |             |             |             |             |             |                    |  |
| 22:25436904        | Cardiomyopathy "Pain,_not_elsewhere_classified"  |                                  |                                                                                           | 4.938547521 | 13.33771448 | 15.90400179 | 0.869851986 | 0.853604618 | ENSG00000167037.14 |  |
|                    | Brain_Cerebellar_Hemisphere                      | SGSM1                            | small G protein signaling modulator 1 [Source:HGNC Symbol;Acc:HGNC:29410]                 |             |             |             |             |             |                    |  |
| 22:25436904        | Cardiomyopathy "Pain,_not_elsewhere_classified"  |                                  |                                                                                           | 4.938547521 | 13.33771448 | 15.90400179 | 0.843888204 | 0.818956592 | ENSG00000197077.8  |  |
|                    | Brain_Frontal_Cortex_BA9                         | KIAA1671                         | KIAA1671 [Source:HGNC Symbol;Acc:HGNC:29345]                                              |             |             |             |             |             |                    |  |
| 22:25436904        | Cardiomyopathy "Pain,_not_elsewhere_classified"  |                                  |                                                                                           | 4.938547521 | 13.33771448 | 15.90400179 | 0.833984239 | 0.851857735 | ENSG00000197077.8  |  |
|                    | Esophagus_Muscularis                             | KIAA1671                         | KIAA1671 [Source:HGNC Symbol;Acc:HGNC:29345]                                              |             |             |             |             |             |                    |  |
| 22:25436904        | Cardiomyopathy "Pain,_not_elsewhere_classified"  |                                  |                                                                                           | 4.938547521 | 13.33771448 | 15.90400179 | 0.823241929 | 0.818499042 | ENSG00000203280.3  |  |
|                    | Muscle_Skeletal                                  |                                  |                                                                                           |             |             |             |             |             |                    |  |
| 22:25436904        | Cardiomyopathy "Pain,_not_elsewhere_classified"  |                                  |                                                                                           | 4.938547521 | 13.33771448 | 15.90400179 | 0.874684721 | 0.882101333 | ENSG00000206066.3  |  |
|                    | Pituitary                                        | IGLL3P                           | "immunoglobulin lambda like polypeptide 3, pseudogene [Source:HGNC Symbol;Acc:HGNC:5872]" |             |             |             |             |             |                    |  |
| 22:25436904        | Cardiomyopathy "Pain,_not_elsewhere_classified"  |                                  |                                                                                           | 4.938547521 | 13.33771448 | 15.90400179 | 0.840217611 | 0.824009591 | ENSG00000197077.8  |  |
|                    | Spleen                                           | KIAA1671                         | KIAA1671 [Source:HGNC Symbol;Acc:HGNC:29345]                                              |             |             |             |             |             |                    |  |
| 22:25436904        | Cardiomyopathy "Pain,_not_elsewhere_classified"  |                                  |                                                                                           | 4.938547521 | 13.33771448 | 15.90400179 | 0.832358716 | 0.806059713 | ENSG00000197077.8  |  |
|                    | Whole_Blood                                      | KIAA1671                         | KIAA1671 [Source:HGNC Symbol;Acc:HGNC:29345]                                              |             |             |             |             |             |                    |  |
| 22:25436904        | Conduction_disorders                             | "Pain,_not_elsewhere_classified" |                                                                                           | 5.764471553 | 13.33771448 | 16.3716802  | 0.825023435 | 0.812459886 |                    |  |
| ENSG00000197077.8  | Brain_Caudate_basal_ganglia                      | KIAA1671                         | KIAA1671 [Source:HGNC Symbol;Acc:HGNC:29345]                                              |             |             |             |             |             |                    |  |
| 22:25436904        | Conduction_disorders                             | "Pain,_not_elsewhere_classified" |                                                                                           | 5.764471553 | 13.33771448 | 16.3716802  | 0.885143284 | 0.853604618 |                    |  |
| ENSG00000167037.14 | Brain_Cerebellar_Hemisphere                      | SGSM1                            | small G protein signaling modulator 1 [Source:HGNC Symbol;Acc:HGNC:29410]                 |             |             |             |             |             |                    |  |
| 22:25436904        | Conduction_disorders                             | "Pain,_not_elsewhere_classified" |                                                                                           | 5.764471553 | 13.33771448 | 16.3716802  | 0.817024826 | 0.818956592 |                    |  |
| ENSG00000197077.8  | Brain_Frontal_Cortex_BA9                         | KIAA1671                         | KIAA1671 [Source:HGNC Symbol;Acc:HGNC:29345]                                              |             |             |             |             |             |                    |  |
| 22:25436904        | Conduction_disorders                             | "Pain,_not_elsewhere_classified" |                                                                                           | 5.764471553 | 13.33771448 | 16.3716802  | 0.829133914 | 0.851857735 |                    |  |
| ENSG00000197077.8  | Esophagus_Muscularis                             | KIAA1671                         | KIAA1671 [Source:HGNC Symbol;Acc:HGNC:29345]                                              |             |             |             |             |             |                    |  |
| 22:25436904        | Conduction_disorders                             | "Pain,_not_elsewhere_classified" |                                                                                           | 5.764471553 | 13.33771448 | 16.3716802  | 0.886808649 | 0.882101333 |                    |  |
| ENSG00000206066.3  | Pituitary                                        | IGLL3P                           | "immunoglobulin lambda like polypeptide 3, pseudogene [Source:HGNC Symbol;Acc:HGNC:5872]" |             |             |             |             |             |                    |  |
| 22:25436904        | Essential_hypertension                           | "Pain,_not_elsewhere_classified" |                                                                                           | 10.30338154 | 13.33771448 | 19.17538899 | 0.900508771 | 0.812459886 |                    |  |

|                    |                                     |                                  |                                                                                           |                                                                                           |             |             |             |                    |  |
|--------------------|-------------------------------------|----------------------------------|-------------------------------------------------------------------------------------------|-------------------------------------------------------------------------------------------|-------------|-------------|-------------|--------------------|--|
| ENSG00000197077.8  | Brain_Caudate_basal_ganglia         | KIAA1671                         | KIAA1671 [Source:HGNC Symbol;Acc:HGNC:29345]                                              |                                                                                           |             |             |             |                    |  |
| 22:25436904        | Essential_hypertension              | "Pain,_not_elsewhere_classified" | 10.30338154                                                                               | 13.33771448                                                                               | 19.17538899 | 0.88170548  | 0.853604618 |                    |  |
| ENSG00000167037.14 | Brain_Cerebellar_Hemisphere         | SGSM1                            | small G protein signaling modulator 1 [Source:HGNC Symbol;Acc:HGNC:29410]                 |                                                                                           |             |             |             |                    |  |
| 22:25436904        | Essential_hypertension              | "Pain,_not_elsewhere_classified" | 10.30338154                                                                               | 13.33771448                                                                               | 19.17538899 | 0.86667919  | 0.818956592 |                    |  |
| ENSG00000197077.8  | Brain_Frontal_Cortex_BA9            | KIAA1671                         | KIAA1671 [Source:HGNC Symbol;Acc:HGNC:29345]                                              |                                                                                           |             |             |             |                    |  |
| 22:25436904        | Essential_hypertension              | "Pain,_not_elsewhere_classified" | 10.30338154                                                                               | 13.33771448                                                                               | 19.17538899 | 0.855401744 | 0.851857735 |                    |  |
| ENSG00000197077.8  | Esophagus_Muscularis                | KIAA1671                         | KIAA1671 [Source:HGNC Symbol;Acc:HGNC:29345]                                              |                                                                                           |             |             |             |                    |  |
| 22:25436904        | Essential_hypertension              | "Pain,_not_elsewhere_classified" | 10.30338154                                                                               | 13.33771448                                                                               | 19.17538899 | 0.810916858 | 0.818499042 |                    |  |
| ENSG00000203280.3  | Muscle_Skeletal                     |                                  |                                                                                           |                                                                                           |             |             |             |                    |  |
| 22:25436904        | Essential_hypertension              | "Pain,_not_elsewhere_classified" | 10.30338154                                                                               | 13.33771448                                                                               | 19.17538899 | 0.880487846 | 0.882101333 |                    |  |
| ENSG00000206066.3  | Pituitary                           | IGLL3P                           | "immunoglobulin lambda like polypeptide 3, pseudogene [Source:HGNC Symbol;Acc:HGNC:5872]" |                                                                                           |             |             |             |                    |  |
| 22:25436904        | Essential_hypertension              | "Pain,_not_elsewhere_classified" | 10.30338154                                                                               | 13.33771448                                                                               | 19.17538899 | 0.836534552 | 0.824009591 |                    |  |
| ENSG00000197077.8  | Spleen                              | KIAA1671                         | KIAA1671 [Source:HGNC Symbol;Acc:HGNC:29345]                                              |                                                                                           |             |             |             |                    |  |
| 22:25436904        | Essential_hypertension              | "Pain,_not_elsewhere_classified" | 10.30338154                                                                               | 13.33771448                                                                               | 19.17538899 | 0.830168355 | 0.806059713 |                    |  |
| ENSG00000197077.8  | Whole_Blood                         | KIAA1671                         | KIAA1671 [Source:HGNC Symbol;Acc:HGNC:29345]                                              |                                                                                           |             |             |             |                    |  |
| 22:25436904        | Heart_failure                       | "Pain,_not_elsewhere_classified" | 7.101494214                                                                               | 13.33771448                                                                               | 17.12898695 | 0.848360022 | 0.812459886 | ENSG00000197077.8  |  |
|                    | Brain_Caudate_basal_ganglia         | KIAA1671                         | KIAA1671 [Source:HGNC Symbol;Acc:HGNC:29345]                                              |                                                                                           |             |             |             |                    |  |
| 22:25436904        | Heart_failure                       | "Pain,_not_elsewhere_classified" | 7.101494214                                                                               | 13.33771448                                                                               | 17.12898695 | 0.933252786 | 0.853604618 | ENSG00000167037.14 |  |
|                    | Brain_Cerebellar_Hemisphere         | SGSM1                            | small G protein signaling modulator 1 [Source:HGNC Symbol;Acc:HGNC:29410]                 |                                                                                           |             |             |             |                    |  |
| 22:25436904        | Heart_failure                       | "Pain,_not_elsewhere_classified" | 7.101494214                                                                               | 13.33771448                                                                               | 17.12898695 | 0.884273639 | 0.818956592 | ENSG00000197077.8  |  |
|                    | Brain_Frontal_Cortex_BA9            | KIAA1671                         | KIAA1671 [Source:HGNC Symbol;Acc:HGNC:29345]                                              |                                                                                           |             |             |             |                    |  |
| 22:25436904        | Heart_failure                       | "Pain,_not_elsewhere_classified" | 7.101494214                                                                               | 13.33771448                                                                               | 17.12898695 | 0.847344336 | 0.851857735 | ENSG00000197077.8  |  |
|                    | Esophagus_Muscularis                | KIAA1671                         | KIAA1671 [Source:HGNC Symbol;Acc:HGNC:29345]                                              |                                                                                           |             |             |             |                    |  |
| 22:25436904        | Heart_failure                       | "Pain,_not_elsewhere_classified" | 7.101494214                                                                               | 13.33771448                                                                               | 17.12898695 | 0.83763821  | 0.818499042 | ENSG00000203280.3  |  |
|                    | Muscle_Skeletal                     |                                  |                                                                                           |                                                                                           |             |             |             |                    |  |
| 22:25436904        | Heart_failure                       | "Pain,_not_elsewhere_classified" | 7.101494214                                                                               | 13.33771448                                                                               | 17.12898695 | 0.87226962  | 0.882101333 | ENSG00000206066.3  |  |
|                    | Pituitary                           | IGLL3P                           | "immunoglobulin lambda like polypeptide 3, pseudogene [Source:HGNC Symbol;Acc:HGNC:5872]" |                                                                                           |             |             |             |                    |  |
| 22:25436904        | Heart_failure                       | "Pain,_not_elsewhere_classified" | 7.101494214                                                                               | 13.33771448                                                                               | 17.12898695 | 0.832704204 | 0.824009591 | ENSG00000197077.8  |  |
|                    | Spleen                              | KIAA1671                         | KIAA1671 [Source:HGNC Symbol;Acc:HGNC:29345]                                              |                                                                                           |             |             |             |                    |  |
| 22:25436904        | Heart_failure                       | "Pain,_not_elsewhere_classified" | 7.101494214                                                                               | 13.33771448                                                                               | 17.12898695 | 0.844825141 | 0.806059713 | ENSG00000197077.8  |  |
|                    | Whole_Blood                         | KIAA1671                         | KIAA1671 [Source:HGNC Symbol;Acc:HGNC:29345]                                              |                                                                                           |             |             |             |                    |  |
| 22:25436904        | Hypertensive_chronic_kidney_disease | "Pain,_not_elsewhere_classified" | 7.426316307                                                                               | 13.33771448                                                                               | 17.4039956  | 0.838493955 |             |                    |  |
| 0.812459886        | ENSG00000197077.8                   | Brain_Caudate_basal_ganglia      | KIAA1671                                                                                  | KIAA1671 [Source:HGNC Symbol;Acc:HGNC:29345]                                              |             |             |             |                    |  |
| 22:25436904        | Hypertensive_chronic_kidney_disease | "Pain,_not_elsewhere_classified" | 7.426316307                                                                               | 13.33771448                                                                               | 17.4039956  | 0.891956485 |             |                    |  |
| 0.853604618        | ENSG00000167037.14                  | Brain_Cerebellar_Hemisphere      | SGSM1                                                                                     | small G protein signaling modulator 1 [Source:HGNC Symbol;Acc:HGNC:29410]                 |             |             |             |                    |  |
| 22:25436904        | Hypertensive_chronic_kidney_disease | "Pain,_not_elsewhere_classified" | 7.426316307                                                                               | 13.33771448                                                                               | 17.4039956  | 0.853570138 |             |                    |  |
| 0.818956592        | ENSG00000197077.8                   | Brain_Frontal_Cortex_BA9         | KIAA1671                                                                                  | KIAA1671 [Source:HGNC Symbol;Acc:HGNC:29345]                                              |             |             |             |                    |  |
| 22:25436904        | Hypertensive_chronic_kidney_disease | "Pain,_not_elsewhere_classified" | 7.426316307                                                                               | 13.33771448                                                                               | 17.4039956  | 0.913270911 |             |                    |  |
| 0.851857735        | ENSG00000197077.8                   | Esophagus_Muscularis             | KIAA1671                                                                                  | KIAA1671 [Source:HGNC Symbol;Acc:HGNC:29345]                                              |             |             |             |                    |  |
| 22:25436904        | Hypertensive_chronic_kidney_disease | "Pain,_not_elsewhere_classified" | 7.426316307                                                                               | 13.33771448                                                                               | 17.4039956  | 0.899637195 |             |                    |  |
| 0.818499042        | ENSG00000203280.3                   | Muscle_Skeletal                  |                                                                                           |                                                                                           |             |             |             |                    |  |
| 22:25436904        | Hypertensive_chronic_kidney_disease | "Pain,_not_elsewhere_classified" | 7.426316307                                                                               | 13.33771448                                                                               | 17.4039956  | 0.902664635 |             |                    |  |
| 0.882101333        | ENSG00000206066.3                   | Pituitary                        | IGLL3P                                                                                    | "immunoglobulin lambda like polypeptide 3, pseudogene [Source:HGNC Symbol;Acc:HGNC:5872]" |             |             |             |                    |  |
| 22:25436904        | Hypertensive_chronic_kidney_disease | "Pain,_not_elsewhere_classified" | 7.426316307                                                                               | 13.33771448                                                                               | 17.4039956  | 0.9053754   |             |                    |  |
| 0.824009591        | ENSG00000197077.8                   | Spleen                           | KIAA1671                                                                                  | KIAA1671 [Source:HGNC Symbol;Acc:HGNC:29345]                                              |             |             |             |                    |  |
| 22:25436904        | Hypertensive_chronic_kidney_disease | "Pain,_not_elsewhere_classified" | 7.426316307                                                                               | 13.33771448                                                                               | 17.4039956  | 0.828607698 |             |                    |  |
| 0.806059713        | ENSG00000197077.8                   | Whole_Blood                      | KIAA1671                                                                                  | KIAA1671 [Source:HGNC Symbol;Acc:HGNC:29345]                                              |             |             |             |                    |  |
| 22:25436904        | Hypotension                         | "Pain,_not_elsewhere_classified" | 6.693360559                                                                               | 13.33771448                                                                               | 16.03718505 | 0.906193592 | 0.853604618 | ENSG00000167037.14 |  |
|                    | Brain_Cerebellar_Hemisphere         | SGSM1                            | small G protein signaling modulator 1 [Source:HGNC Symbol;Acc:HGNC:29410]                 |                                                                                           |             |             |             |                    |  |
| 22:25436904        | Hypotension                         | "Pain,_not_elsewhere_classified" | 6.693360559                                                                               | 13.33771448                                                                               | 16.03718505 | 0.844780489 | 0.882101333 | ENSG00000206066.3  |  |
|                    | Pituitary                           | IGLL3P                           | "immunoglobulin lambda like polypeptide 3, pseudogene [Source:HGNC Symbol;Acc:HGNC:5872]" |                                                                                           |             |             |             |                    |  |
| 22:25436904        | Hypotension                         | "Pain,_not_elsewhere_classified" | 6.693360559                                                                               | 13.33771448                                                                               | 16.03718505 | 0.806016474 | 0.824009591 | ENSG00000197077.8  |  |

|                    |                                       |                                                 |                                                                                          |                                                     |             |             |             |                   |  |
|--------------------|---------------------------------------|-------------------------------------------------|------------------------------------------------------------------------------------------|-----------------------------------------------------|-------------|-------------|-------------|-------------------|--|
|                    | Spleen                                | KIAA1671                                        | KIAA1671 [Source:HGNC Symbol;Acc:HGNC:29345]                                             |                                                     |             |             |             |                   |  |
| 22:25436904        | Hypotension                           | "Pain,_not_elsewhere_classified"                | 6.693360559                                                                              | 13.33771448                                         | 16.03718505 | 0.850719349 | 0.806059713 | ENSG00000197077.8 |  |
|                    | Whole_Blood                           | KIAA1671                                        | KIAA1671 [Source:HGNC Symbol;Acc:HGNC:29345]                                             |                                                     |             |             |             |                   |  |
| 22:25436904        | Other_diseases_of_endocardium         | "Pain,_not_elsewhere_classified"                | 5.844967771                                                                              | 13.33771448                                         | 16.67723974 | 0.835742469 | 0.812459886 |                   |  |
| ENSG00000197077.8  | Brain_Caudate_basal_ganglia           | KIAA1671                                        | KIAA1671 [Source:HGNC Symbol;Acc:HGNC:29345]                                             |                                                     |             |             |             |                   |  |
| 22:25436904        | Other_diseases_of_endocardium         | "Pain,_not_elsewhere_classified"                | 5.844967771                                                                              | 13.33771448                                         | 16.67723974 | 0.862247533 | 0.853604618 |                   |  |
| ENSG00000167037.14 | Brain_Cerebellar_Hemisphere           | SGSM1                                           | small G protein signaling modulator 1 [Source:HGNC Symbol;Acc:HGNC:29410]                |                                                     |             |             |             |                   |  |
| 22:25436904        | Other_diseases_of_endocardium         | "Pain,_not_elsewhere_classified"                | 5.844967771                                                                              | 13.33771448                                         | 16.67723974 | 0.82009542  | 0.818956592 |                   |  |
| ENSG00000197077.8  | Brain_Frontal_Cortex_BA9              | KIAA1671                                        | KIAA1671 [Source:HGNC Symbol;Acc:HGNC:29345]                                             |                                                     |             |             |             |                   |  |
| 22:25436904        | Other_diseases_of_endocardium         | "Pain,_not_elsewhere_classified"                | 5.844967771                                                                              | 13.33771448                                         | 16.67723974 | 0.84806912  | 0.882101333 |                   |  |
| ENSG00000206066.3  | Pituitary                             | IGLL3P                                          | immunoglobulin lambda like polypeptide 3, pseudogene [Source:HGNC Symbol;Acc:HGNC:5872]" |                                                     |             |             |             |                   |  |
| 22:28250172        | Cardiac_dysrhythmias                  | "Pain,_not_elsewhere_classified"                | 10.51741223                                                                              | 4.966174306                                         | 12.4432537  | 0.830211073 | 0.866184328 |                   |  |
| ENSG00000235954.2  | Adipose_Visceral_Omentum              | TTC28-AS1                                       | TTC28 antisense RNA 1 [Source:HGNC Symbol;Acc:HGNC:29336]                                |                                                     |             |             |             |                   |  |
| 22:28250172        | Cardiac_dysrhythmias                  | "Pain,_not_elsewhere_classified"                | 10.51741223                                                                              | 4.966174306                                         | 12.4432537  | 0.946828732 | 0.972444579 |                   |  |
| ENSG00000183579.11 | Artery_Aorta                          | ZNRF3                                           | zinc and ring finger 3 [Source:HGNC Symbol;Acc:HGNC:18126]                               |                                                     |             |             |             |                   |  |
| 22:28250172        | Cardiac_dysrhythmias                  | "Pain,_not_elsewhere_classified"                | 10.51741223                                                                              | 4.966174306                                         | 12.4432537  | 0.889717456 | 0.893902199 |                   |  |
| ENSG00000235954.2  | Brain_Amygdala                        | TTC28-AS1                                       | TTC28 antisense RNA 1 [Source:HGNC Symbol;Acc:HGNC:29336]                                |                                                     |             |             |             |                   |  |
| 22:28250172        | Cardiac_dysrhythmias                  | "Pain,_not_elsewhere_classified"                | 10.51741223                                                                              | 4.966174306                                         | 12.4432537  | 0.969722159 | 0.892178973 |                   |  |
| ENSG00000235954.2  | Brain_Anterior_cingulate_cortex_BA24  | TTC28-AS1                                       | TTC28 antisense RNA 1 [Source:HGNC Symbol;Acc:HGNC:29336]                                |                                                     |             |             |             |                   |  |
| 22:28250172        | Cardiac_dysrhythmias                  | "Pain,_not_elsewhere_classified"                | 10.51741223                                                                              | 4.966174306                                         | 12.4432537  | 0.997113211 | 0.841816956 |                   |  |
| ENSG00000235954.2  | Brain_Caudate_basal_ganglia           | TTC28-AS1                                       | TTC28 antisense RNA 1 [Source:HGNC Symbol;Acc:HGNC:29336]                                |                                                     |             |             |             |                   |  |
| 22:28250172        | Cardiac_dysrhythmias                  | "Pain,_not_elsewhere_classified"                | 10.51741223                                                                              | 4.966174306                                         | 12.4432537  | 0.893093324 | 0.883369407 |                   |  |
| ENSG00000235954.2  | Brain_Frontal_Cortex_BA9              | TTC28-AS1                                       | TTC28 antisense RNA 1 [Source:HGNC Symbol;Acc:HGNC:29336]                                |                                                     |             |             |             |                   |  |
| 22:28250172        | Cardiac_dysrhythmias                  | "Pain,_not_elsewhere_classified"                | 10.51741223                                                                              | 4.966174306                                         | 12.4432537  | 0.962747003 | 0.885976333 |                   |  |
| ENSG00000235954.2  | Brain_Hippocampus                     | TTC28-AS1                                       | TTC28 antisense RNA 1 [Source:HGNC Symbol;Acc:HGNC:29336]                                |                                                     |             |             |             |                   |  |
| 22:28250172        | Cardiac_dysrhythmias                  | "Pain,_not_elsewhere_classified"                | 10.51741223                                                                              | 4.966174306                                         | 12.4432537  | 0.94944715  | 0.877640376 |                   |  |
| ENSG00000235954.2  | Brain_Hypothalamus                    | TTC28-AS1                                       | TTC28 antisense RNA 1 [Source:HGNC Symbol;Acc:HGNC:29336]                                |                                                     |             |             |             |                   |  |
| 22:28250172        | Cardiac_dysrhythmias                  | "Pain,_not_elsewhere_classified"                | 10.51741223                                                                              | 4.966174306                                         | 12.4432537  | 0.926731501 | 0.876134449 |                   |  |
| ENSG00000235954.2  | Brain_Nucleus_accumbens_basal_ganglia | TTC28-AS1                                       | TTC28 antisense RNA 1 [Source:HGNC Symbol;Acc:HGNC:29336]                                |                                                     |             |             |             |                   |  |
| 22:28250172        | Cardiac_dysrhythmias                  | "Pain,_not_elsewhere_classified"                | 10.51741223                                                                              | 4.966174306                                         | 12.4432537  | 0.95021169  | 0.878178733 |                   |  |
| ENSG00000235954.2  | Brain_Putamen_basal_ganglia           | TTC28-AS1                                       | TTC28 antisense RNA 1 [Source:HGNC Symbol;Acc:HGNC:29336]                                |                                                     |             |             |             |                   |  |
| 22:28250172        | Cardiac_dysrhythmias                  | "Pain,_not_elsewhere_classified"                | 10.51741223                                                                              | 4.966174306                                         | 12.4432537  | 0.936956805 | 0.896790967 |                   |  |
| ENSG00000235954.2  | Brain_Spinal_cord_cervical_c-1        | TTC28-AS1                                       | TTC28 antisense RNA 1 [Source:HGNC Symbol;Acc:HGNC:29336]                                |                                                     |             |             |             |                   |  |
| 22:28250172        | Cardiac_dysrhythmias                  | "Pain,_not_elsewhere_classified"                | 10.51741223                                                                              | 4.966174306                                         | 12.4432537  | 0.955504441 | 0.904521541 |                   |  |
| ENSG00000235954.2  | Brain_Substantia_nigra                | TTC28-AS1                                       | TTC28 antisense RNA 1 [Source:HGNC Symbol;Acc:HGNC:29336]                                |                                                     |             |             |             |                   |  |
| 22:28250172        | Cardiac_dysrhythmias                  | "Pain,_not_elsewhere_classified"                | 10.51741223                                                                              | 4.966174306                                         | 12.4432537  | 0.898479724 | 0.864643416 |                   |  |
| ENSG00000235954.2  | Cells_Transformed_fibroblasts         | TTC28-AS1                                       | TTC28 antisense RNA 1 [Source:HGNC Symbol;Acc:HGNC:29336]                                |                                                     |             |             |             |                   |  |
| 22:28250172        | Cardiac_dysrhythmias                  | "Pain,_not_elsewhere_classified"                | 10.51741223                                                                              | 4.966174306                                         | 12.4432537  | 0.995282213 | 0.864158373 |                   |  |
| ENSG00000235954.2  | Colon_Sigmoid                         | TTC28-AS1                                       | TTC28 antisense RNA 1 [Source:HGNC Symbol;Acc:HGNC:29336]                                |                                                     |             |             |             |                   |  |
| 22:28250172        | Cardiac_dysrhythmias                  | "Pain,_not_elsewhere_classified"                | 10.51741223                                                                              | 4.966174306                                         | 12.4432537  | 0.87396371  | 0.889924423 |                   |  |
| ENSG00000235954.2  | Colon_Transverse                      | TTC28-AS1                                       | TTC28 antisense RNA 1 [Source:HGNC Symbol;Acc:HGNC:29336]                                |                                                     |             |             |             |                   |  |
| 22:28250172        | Cardiac_dysrhythmias                  | "Pain,_not_elsewhere_classified"                | 10.51741223                                                                              | 4.966174306                                         | 12.4432537  | 0.920819067 | 0.890813479 |                   |  |
| ENSG00000235954.2  | Minor_Salivary_Gland                  | TTC28-AS1                                       | TTC28 antisense RNA 1 [Source:HGNC Symbol;Acc:HGNC:29336]                                |                                                     |             |             |             |                   |  |
| 22:28250172        | Cardiac_dysrhythmias                  | "Pain,_not_elsewhere_classified"                | 10.51741223                                                                              | 4.966174306                                         | 12.4432537  | 0.962357677 | 0.946247351 |                   |  |
| ENSG00000100154.10 | Muscle_Skeletal                       | TTC28                                           | tetratricopeptide repeat domain 28 [Source:HGNC Symbol;Acc:HGNC:29179]                   |                                                     |             |             |             |                   |  |
| 22:28250172        | Cardiac_dysrhythmias                  | "Pain,_not_elsewhere_classified"                | 10.51741223                                                                              | 4.966174306                                         | 12.4432537  | 0.856440325 | 0.882538639 |                   |  |
| ENSG00000235954.2  | Spleen                                | TTC28-AS1                                       | TTC28 antisense RNA 1 [Source:HGNC Symbol;Acc:HGNC:29336]                                |                                                     |             |             |             |                   |  |
| 22:28250172        | Cardiac_dysrhythmias                  | "Pain,_not_elsewhere_classified"                | 10.51741223                                                                              | 4.966174306                                         | 12.4432537  | 0.813182693 | 0.868840394 |                   |  |
| ENSG00000100154.10 | Testis                                | TTC28                                           | tetratricopeptide repeat domain 28 [Source:HGNC Symbol;Acc:HGNC:29179]                   |                                                     |             |             |             |                   |  |
| 22:33079917        | Cardiac_dysrhythmias                  | Hereditary_and_idiopathic_peripheral_neuropathy | 11.27992343                                                                              | 3.049294465                                         | 11.88428987 | 0.827620922 |             |                   |  |
| 0.800239301        | ENSG00000100225.13                    | Brain_Cerebellum                                | FBX07                                                                                    | F-box protein 7 [Source:HGNC Symbol;Acc:HGNC:13586] |             |             |             |                   |  |
| 22:33079917        | Cardiac_dysrhythmias                  | Hereditary_and_idiopathic_peripheral_neuropathy | 11.27992343                                                                              | 3.049294465                                         | 11.88428987 | 0.876102644 |             |                   |  |

|                    |                                     |                               |                                                            |                                                            |                                                     |             |             |             |
|--------------------|-------------------------------------|-------------------------------|------------------------------------------------------------|------------------------------------------------------------|-----------------------------------------------------|-------------|-------------|-------------|
| 0.877953699        | ENSG00000242082.1                   | Brain_Cortex                  | SLC5A4-AS1                                                 | SLC5A4 antisense RNA 1 [Source:HGNC Symbol;Acc:HGNC:53163] |                                                     |             |             |             |
| 22:33079917        | Cardiac_dysrhythmias                |                               | Hereditary_and_idiopathic_peripheral_neuropathy            |                                                            | 11.27992343                                         | 3.049294465 | 11.88428987 | 0.852709887 |
| 0.847289024        | ENSG00000100225.13                  | Brain_Hippocampus             | FBX07                                                      | F-box protein 7 [Source:HGNC Symbol;Acc:HGNC:13586]        |                                                     |             |             |             |
| 22:33079917        | Cardiac_dysrhythmias                |                               | Hereditary_and_idiopathic_peripheral_neuropathy            |                                                            | 11.27992343                                         | 3.049294465 | 11.88428987 | 0.847809357 |
| 0.819762491        | ENSG00000100225.13                  |                               | Cells_Transformed_fibroblasts                              | FBX07                                                      | F-box protein 7 [Source:HGNC Symbol;Acc:HGNC:13586] |             |             |             |
| 22:33079917        | Cardiac_dysrhythmias                |                               | Hereditary_and_idiopathic_peripheral_neuropathy            |                                                            | 11.27992343                                         | 3.049294465 | 11.88428987 | 0.827616651 |
| 0.800230909        | ENSG00000100225.13                  |                               | Esophagus_Mucosa                                           | FBX07                                                      | F-box protein 7 [Source:HGNC Symbol;Acc:HGNC:13586] |             |             |             |
| 22:33079917        | Cardiac_dysrhythmias                |                               | Hereditary_and_idiopathic_peripheral_neuropathy            |                                                            | 11.27992343                                         | 3.049294465 | 11.88428987 | 0.826943074 |
| 0.812165296        | ENSG00000100225.13                  |                               | Lung                                                       | FBX07                                                      | F-box protein 7 [Source:HGNC Symbol;Acc:HGNC:13586] |             |             |             |
| 22:33079917        | Cardiac_dysrhythmias                |                               | Hereditary_and_idiopathic_peripheral_neuropathy            |                                                            | 11.27992343                                         | 3.049294465 | 11.88428987 | 0.827146442 |
| 0.803072008        | ENSG00000100225.13                  |                               | Muscle_Skeletal                                            | FBX07                                                      | F-box protein 7 [Source:HGNC Symbol;Acc:HGNC:13586] |             |             |             |
| 22:33079917        | Cardiac_dysrhythmias                |                               | Hereditary_and_idiopathic_peripheral_neuropathy            |                                                            | 11.27992343                                         | 3.049294465 | 11.88428987 | 0.834213938 |
| 0.81638795         | ENSG00000100225.13                  |                               | Pancreas                                                   | FBX07                                                      | F-box protein 7 [Source:HGNC Symbol;Acc:HGNC:13586] |             |             |             |
| 22:33079917        | Cardiac_dysrhythmias                |                               | Hereditary_and_idiopathic_peripheral_neuropathy            |                                                            | 11.27992343                                         | 3.049294465 | 11.88428987 | 0.837349043 |
| 0.814488092        | ENSG00000100225.13                  |                               | Vagina                                                     | FBX07                                                      | F-box protein 7 [Source:HGNC Symbol;Acc:HGNC:13586] |             |             |             |
| 22:33079917        | Cardiac_dysrhythmias                |                               | Inflammatory_and_toxic_neuropathy                          |                                                            | 11.27992343                                         | 3.958212681 | 12.25359372 | 0.876102644 |
| ENSG00000242082.1  | Brain_Cortex                        | SLC5A4-AS1                    | SLC5A4 antisense RNA 1 [Source:HGNC Symbol;Acc:HGNC:53163] |                                                            |                                                     |             |             |             |
| 22:33079917        | Cardiac_dysrhythmias                |                               | Inflammatory_and_toxic_neuropathy                          |                                                            | 11.27992343                                         | 3.958212681 | 12.25359372 | 0.852709887 |
| ENSG00000100225.13 | Brain_Hippocampus                   | FBX07                         | F-box protein 7 [Source:HGNC Symbol;Acc:HGNC:13586]        |                                                            |                                                     |             |             |             |
| 22:33079917        | Cardiac_dysrhythmias                |                               | Mononeuritis_of_lower_limb_and_unspecified_site            |                                                            | 11.27992343                                         | 3.153154653 | 12.24233331 | 0.876102644 |
| 0.873436187        | ENSG00000242082.1                   | Brain_Cortex                  | SLC5A4-AS1                                                 | SLC5A4 antisense RNA 1 [Source:HGNC Symbol;Acc:HGNC:53163] |                                                     |             |             |             |
| 22:33079917        | Cardiac_dysrhythmias                |                               | Mononeuritis_of_lower_limb_and_unspecified_site            |                                                            | 11.27992343                                         | 3.153154653 | 12.24233331 | 0.852709887 |
| 0.82755501         | ENSG00000100225.13                  |                               | Brain_Hippocampus                                          | FBX07                                                      | F-box protein 7 [Source:HGNC Symbol;Acc:HGNC:13586] |             |             |             |
| 22:33079917        | Cardiac_dysrhythmias                |                               | "Pain,_not_elsewhere_classified"                           |                                                            | 11.27992343                                         | 8.423543468 | 16.01108722 | 0.876202922 |
| ENSG00000100225.13 | Brain_Cerebellum                    | FBX07                         | F-box protein 7 [Source:HGNC Symbol;Acc:HGNC:13586]        |                                                            |                                                     |             |             |             |
| 22:33079917        | Cardiac_dysrhythmias                |                               | "Pain,_not_elsewhere_classified"                           |                                                            | 11.27992343                                         | 8.423543468 | 16.01108722 | 0.876102644 |
| ENSG00000242082.1  | Brain_Cortex                        | SLC5A4-AS1                    | SLC5A4 antisense RNA 1 [Source:HGNC Symbol;Acc:HGNC:53163] |                                                            |                                                     |             |             |             |
| 22:33079917        | Cardiac_dysrhythmias                |                               | "Pain,_not_elsewhere_classified"                           |                                                            | 11.27992343                                         | 8.423543468 | 16.01108722 | 0.852709887 |
| ENSG00000100225.13 | Brain_Hippocampus                   | FBX07                         | F-box protein 7 [Source:HGNC Symbol;Acc:HGNC:13586]        |                                                            |                                                     |             |             |             |
| 22:33079917        | Cardiac_dysrhythmias                |                               | "Pain,_not_elsewhere_classified"                           |                                                            | 11.27992343                                         | 8.423543468 | 16.01108722 | 0.847809357 |
| ENSG00000100225.13 | Cells_Transformed_fibroblasts       | FBX07                         | F-box protein 7 [Source:HGNC Symbol;Acc:HGNC:13586]        |                                                            |                                                     |             |             |             |
| 22:33079917        | Cardiac_dysrhythmias                |                               | "Pain,_not_elsewhere_classified"                           |                                                            | 11.27992343                                         | 8.423543468 | 16.01108722 | 0.827616651 |
| ENSG00000100225.13 | Esophagus_Mucosa                    | FBX07                         | F-box protein 7 [Source:HGNC Symbol;Acc:HGNC:13586]        |                                                            |                                                     |             |             |             |
| 22:33079917        | Cardiac_dysrhythmias                |                               | "Pain,_not_elsewhere_classified"                           |                                                            | 11.27992343                                         | 8.423543468 | 16.01108722 | 0.826943074 |
| 0.958886851        | ENSG00000100225.13                  | Lung                          | FBX07                                                      | F-box protein 7 [Source:HGNC Symbol;Acc:HGNC:13586]        |                                                     |             |             |             |
| 22:33079917        | Cardiac_dysrhythmias                |                               | "Pain,_not_elsewhere_classified"                           |                                                            | 11.27992343                                         | 8.423543468 | 16.01108722 | 0.958849273 |
| ENSG00000100225.13 | Muscle_Skeletal                     | FBX07                         | F-box protein 7 [Source:HGNC Symbol;Acc:HGNC:13586]        |                                                            |                                                     |             |             |             |
| 22:33079917        | Cardiac_dysrhythmias                |                               | "Pain,_not_elsewhere_classified"                           |                                                            | 11.27992343                                         | 8.423543468 | 16.01108722 | 0.834213938 |
| ENSG00000100225.13 | Pancreas                            | FBX07                         | F-box protein 7 [Source:HGNC Symbol;Acc:HGNC:13586]        |                                                            |                                                     |             |             |             |
| 22:33079917        | Cardiac_dysrhythmias                |                               | "Pain,_not_elsewhere_classified"                           |                                                            | 11.27992343                                         | 8.423543468 | 16.01108722 | 0.95449967  |
| ENSG00000100225.13 | Vagina                              | FBX07                         | F-box protein 7 [Source:HGNC Symbol;Acc:HGNC:13586]        |                                                            |                                                     |             |             |             |
| 22:33079917        | Cardiac_dysrhythmias                |                               | "Pain,_not_elsewhere_classified"                           |                                                            | 11.27992343                                         | 8.423543468 | 16.01108722 | 0.837349043 |
| ENSG00000100225.13 | Hypertensive_chronic_kidney_disease |                               | "Pain,_not_elsewhere_classified"                           |                                                            | 6.449038248                                         | 8.423543468 | 12.06407669 | 0.954926883 |
| 0.958886851        | ENSG00000100225.13                  | Brain_Cerebellum              | FBX07                                                      | F-box protein 7 [Source:HGNC Symbol;Acc:HGNC:13586]        |                                                     |             |             |             |
| 22:33079917        | Hypertensive_chronic_kidney_disease |                               | "Pain,_not_elsewhere_classified"                           |                                                            | 6.449038248                                         | 8.423543468 | 12.06407669 | 0.931746136 |
| 0.863418854        | ENSG00000242082.1                   | Brain_Cortex                  | SLC5A4-AS1                                                 | SLC5A4 antisense RNA 1 [Source:HGNC Symbol;Acc:HGNC:53163] |                                                     |             |             |             |
| 22:33079917        | Hypertensive_chronic_kidney_disease |                               | "Pain,_not_elsewhere_classified"                           |                                                            | 6.449038248                                         | 8.423543468 | 12.06407669 | 0.873376331 |
| 0.937441874        | ENSG00000100225.13                  | Brain_Hippocampus             | FBX07                                                      | F-box protein 7 [Source:HGNC Symbol;Acc:HGNC:13586]        |                                                     |             |             |             |
| 22:33079917        | Hypertensive_chronic_kidney_disease |                               | "Pain,_not_elsewhere_classified"                           |                                                            | 6.449038248                                         | 8.423543468 | 12.06407669 | 0.912985964 |
| 0.949103832        | ENSG00000100225.13                  | Cells_Transformed_fibroblasts | FBX07                                                      | F-box protein 7 [Source:HGNC Symbol;Acc:HGNC:13586]        |                                                     |             |             |             |
| 22:33079917        | Hypertensive_chronic_kidney_disease |                               | "Pain,_not_elsewhere_classified"                           |                                                            | 6.449038248                                         | 8.423543468 | 12.06407669 | 0.932139218 |
| 0.958888894        | ENSG00000100225.13                  | Esophagus_Mucosa              | FBX07                                                      | F-box protein 7 [Source:HGNC Symbol;Acc:HGNC:13586]        |                                                     |             |             |             |
| 22:33079917        | Hypertensive_chronic_kidney_disease |                               | "Pain,_not_elsewhere_classified"                           |                                                            | 6.449038248                                         | 8.423543468 | 12.06407669 | 0.931748434 |
| 0.958888894        | ENSG00000100225.13                  | Esophagus_Mucosa              | FBX07                                                      | F-box protein 7 [Source:HGNC Symbol;Acc:HGNC:13586]        |                                                     |             |             |             |
| 22:33079917        | Hypertensive_chronic_kidney_disease |                               | "Pain,_not_elsewhere_classified"                           |                                                            | 6.449038248                                         | 8.423543468 | 12.06407669 | 0.926748859 |

|                                       |                                     |                                                                                                         |                                                            |                                                     |             |             |             |             |             |
|---------------------------------------|-------------------------------------|---------------------------------------------------------------------------------------------------------|------------------------------------------------------------|-----------------------------------------------------|-------------|-------------|-------------|-------------|-------------|
| 0.954087322                           | ENSG00000100225.13                  | Lung                                                                                                    | FBX07                                                      | F-box protein 7 [Source:HGNC Symbol;Acc:HGNC:13586] |             |             |             |             |             |
| 22:33079917                           | Hypertensive_chronic_kidney_disease | "Pain,_not_elsewhere_classified"                                                                        |                                                            |                                                     | 6.449038248 | 8.423543468 | 12.06407669 | 0.931054474 |             |
| 0.958849273                           | ENSG00000100225.13                  | Muscle_Skeletal                                                                                         | FBX07                                                      | F-box protein 7 [Source:HGNC Symbol;Acc:HGNC:13586] |             |             |             |             |             |
| 22:33079917                           | Hypertensive_chronic_kidney_disease | "Pain,_not_elsewhere_classified"                                                                        |                                                            |                                                     | 6.449038248 | 8.423543468 | 12.06407669 | 0.926878467 |             |
| 0.95449967                            | ENSG00000100225.13                  | Pancreas                                                                                                | FBX07                                                      | F-box protein 7 [Source:HGNC Symbol;Acc:HGNC:13586] |             |             |             |             |             |
| 22:33079917                           | Hypertensive_chronic_kidney_disease | "Pain,_not_elsewhere_classified"                                                                        |                                                            |                                                     | 6.449038248 | 8.423543468 | 12.06407669 | 0.92795947  |             |
| 0.954926883                           | ENSG00000100225.13                  | Vagina                                                                                                  | FBX07                                                      | F-box protein 7 [Source:HGNC Symbol;Acc:HGNC:13586] |             |             |             |             |             |
| 22:33079917                           | Hypertensive_heart_disease          | "Pain,_not_elsewhere_classified"                                                                        |                                                            |                                                     | 4.190507623 | 8.423543468 | 10.59156579 | 0.834134904 | 0.958886851 |
| ENSG00000100225.13                    | Brain_Cerebellum                    | "Pain,_not_elsewhere_classified"                                                                        | FBX07                                                      | F-box protein 7 [Source:HGNC Symbol;Acc:HGNC:13586] |             |             |             |             |             |
| 22:33079917                           | Hypertensive_heart_disease          | "Pain,_not_elsewhere_classified"                                                                        |                                                            |                                                     | 4.190507623 | 8.423543468 | 10.59156579 | 0.868808986 | 0.863418854 |
| ENSG00000100225.13                    | Brain_Cortex                        | SLC5A4-AS1                                                                                              | SLC5A4 antisense RNA 1 [Source:HGNC Symbol;Acc:HGNC:53163] |                                                     |             |             |             |             |             |
| 22:33079917                           | Hypertensive_heart_disease          | "Pain,_not_elsewhere_classified"                                                                        |                                                            |                                                     | 4.190507623 | 8.423543468 | 10.59156579 | 0.856412062 | 0.937441874 |
| ENSG00000100225.13                    | Brain_Hippocampus                   | "Pain,_not_elsewhere_classified"                                                                        | FBX07                                                      | F-box protein 7 [Source:HGNC Symbol;Acc:HGNC:13586] |             |             |             |             |             |
| 22:33079917                           | Hypertensive_heart_disease          | "Pain,_not_elsewhere_classified"                                                                        |                                                            |                                                     | 4.190507623 | 8.423543468 | 10.59156579 | 0.841836709 | 0.949103832 |
| ENSG00000100225.13                    | Cells_Transformed_fibroblasts       | "Pain,_not_elsewhere_classified"                                                                        | FBX07                                                      | F-box protein 7 [Source:HGNC Symbol;Acc:HGNC:13586] |             |             |             |             |             |
| 22:33079917                           | Hypertensive_heart_disease          | "Pain,_not_elsewhere_classified"                                                                        |                                                            |                                                     | 4.190507623 | 8.423543468 | 10.59156579 | 0.834130712 | 0.958888894 |
| ENSG00000100225.13                    | Esophagus_Mucosa                    | "Pain,_not_elsewhere_classified"                                                                        | FBX07                                                      | F-box protein 7 [Source:HGNC Symbol;Acc:HGNC:13586] |             |             |             |             |             |
| 22:33079917                           | Hypertensive_heart_disease          | "Pain,_not_elsewhere_classified"                                                                        |                                                            |                                                     | 4.190507623 | 8.423543468 | 10.59156579 | 0.838330761 | 0.954087322 |
| ENSG00000100225.13                    | Lung                                | "Pain,_not_elsewhere_classified"                                                                        | FBX07                                                      | F-box protein 7 [Source:HGNC Symbol;Acc:HGNC:13586] |             |             |             |             |             |
| 22:33079917                           | Hypertensive_heart_disease          | "Pain,_not_elsewhere_classified"                                                                        |                                                            |                                                     | 4.190507623 | 8.423543468 | 10.59156579 | 0.837552007 | 0.958849273 |
| ENSG00000100225.13                    | Muscle_Skeletal                     | "Pain,_not_elsewhere_classified"                                                                        | FBX07                                                      | F-box protein 7 [Source:HGNC Symbol;Acc:HGNC:13586] |             |             |             |             |             |
| 22:33079917                           | Hypertensive_heart_disease          | "Pain,_not_elsewhere_classified"                                                                        |                                                            |                                                     | 4.190507623 | 8.423543468 | 10.59156579 | 0.842190235 | 0.95449967  |
| ENSG00000100225.13                    | Pancreas                            | "Pain,_not_elsewhere_classified"                                                                        | FBX07                                                      | F-box protein 7 [Source:HGNC Symbol;Acc:HGNC:13586] |             |             |             |             |             |
| 22:33079917                           | Hypertensive_heart_disease          | "Pain,_not_elsewhere_classified"                                                                        |                                                            |                                                     | 4.190507623 | 8.423543468 | 10.59156579 | 0.805405322 | 0.84533648  |
| ENSG00000236054.1                     | Testis                              | "Pain,_not_elsewhere_classified"                                                                        |                                                            |                                                     | 4.190507623 | 8.423543468 | 10.59156579 | 0.84192959  | 0.954926883 |
| 22:33079917                           | Hypertensive_heart_disease          | "Pain,_not_elsewhere_classified"                                                                        |                                                            |                                                     | 4.190507623 | 8.423543468 | 10.59156579 | 0.84192959  | 0.954926883 |
| ENSG00000100225.13                    | Vagina                              | "Pain,_not_elsewhere_classified"                                                                        | FBX07                                                      | F-box protein 7 [Source:HGNC Symbol;Acc:HGNC:13586] |             |             |             |             |             |
| 22:33079917                           | Hypotension                         | "Pain,_not_elsewhere_classified"                                                                        |                                                            |                                                     | 8.197021145 | 8.423543468 | 12.95880227 | 0.859787636 | 0.863418854 |
| ENSG00000242082.1                     | Brain_Cortex                        | SLC5A4-AS1                                                                                              | SLC5A4 antisense RNA 1 [Source:HGNC Symbol;Acc:HGNC:53163] |                                                     |             |             |             |             |             |
| 22:33079917                           | Hypotension                         | "Pain,_not_elsewhere_classified"                                                                        |                                                            |                                                     | 8.197021145 | 8.423543468 | 12.95880227 | 0.808260451 | 0.937441874 |
| ENSG00000100225.13                    | Brain_Hippocampus                   | "Pain,_not_elsewhere_classified"                                                                        | FBX07                                                      | F-box protein 7 [Source:HGNC Symbol;Acc:HGNC:13586] |             |             |             |             |             |
| 22:33079917                           | Hypotension                         | "Pain,_not_elsewhere_classified"                                                                        |                                                            |                                                     | 8.197021145 | 8.423543468 | 12.95880227 | 0.878954124 | 0.84533648  |
| ENSG00000236054.1                     | Testis                              | "Pain,_not_elsewhere_classified"                                                                        |                                                            |                                                     | 8.197021145 | 8.423543468 | 12.95880227 | 0.878954124 | 0.84533648  |
| 6:32569056                            | Atherosclerosis Multiple_sclerosis  | "Pain,_not_elsewhere_classified"                                                                        |                                                            |                                                     | 4.190507623 | 8.423543468 | 10.59156579 | 0.84192959  | 0.954926883 |
| Brain_Amygdala                        | HLA-DRB5                            | "major histocompatibility complex, class II, DR beta 5 [Source:HGNC Symbol;Acc:HGNC:4953]"              |                                                            |                                                     | 4.190507623 | 8.423543468 | 10.59156579 | 0.84192959  | 0.954926883 |
| 6:32569056                            | Atherosclerosis Multiple_sclerosis  | "Pain,_not_elsewhere_classified"                                                                        |                                                            |                                                     | 4.190507623 | 8.423543468 | 10.59156579 | 0.84192959  | 0.954926883 |
| Brain_Frontal_Cortex_BA9              | HLA-DRB5                            | "major histocompatibility complex, class II, DR beta 5 [Source:HGNC Symbol;Acc:HGNC:4953]"              |                                                            |                                                     | 4.190507623 | 8.423543468 | 10.59156579 | 0.84192959  | 0.954926883 |
| 6:32569056                            | Atherosclerosis Multiple_sclerosis  | "Pain,_not_elsewhere_classified"                                                                        |                                                            |                                                     | 4.190507623 | 8.423543468 | 10.59156579 | 0.84192959  | 0.954926883 |
| Brain_Hypothalamus                    | HLA-DRB5                            | "major histocompatibility complex, class II, DR beta 5 [Source:HGNC Symbol;Acc:HGNC:4953]"              |                                                            |                                                     | 4.190507623 | 8.423543468 | 10.59156579 | 0.84192959  | 0.954926883 |
| 6:32569056                            | Atherosclerosis Multiple_sclerosis  | "Pain,_not_elsewhere_classified"                                                                        |                                                            |                                                     | 4.190507623 | 8.423543468 | 10.59156579 | 0.84192959  | 0.954926883 |
| Brain_Nucleus_accumbens_basal_ganglia | HLA-DRB5                            | "major histocompatibility complex, class II, DR beta 5 [Source:HGNC Symbol;Acc:HGNC:4953]"              |                                                            |                                                     | 4.190507623 | 8.423543468 | 10.59156579 | 0.84192959  | 0.954926883 |
| 6:32569056                            | Atherosclerosis Multiple_sclerosis  | "Pain,_not_elsewhere_classified"                                                                        |                                                            |                                                     | 4.190507623 | 8.423543468 | 10.59156579 | 0.84192959  | 0.954926883 |
| Brain_Spinal_cord_cervical_c-1        | HLA-DRB5                            | "major histocompatibility complex, class II, DR beta 5 [Source:HGNC Symbol;Acc:HGNC:4953]"              |                                                            |                                                     | 4.190507623 | 8.423543468 | 10.59156579 | 0.84192959  | 0.954926883 |
| 6:32569056                            | Atherosclerosis Multiple_sclerosis  | "Pain,_not_elsewhere_classified"                                                                        |                                                            |                                                     | 4.190507623 | 8.423543468 | 10.59156579 | 0.84192959  | 0.954926883 |
| Brain_Substantia_nigra                | HLA-DRB5                            | "major histocompatibility complex, class II, DR beta 5 [Source:HGNC Symbol;Acc:HGNC:4953]"              |                                                            |                                                     | 4.190507623 | 8.423543468 | 10.59156579 | 0.84192959  | 0.954926883 |
| 6:32569056                            | Atherosclerosis Multiple_sclerosis  | "Pain,_not_elsewhere_classified"                                                                        |                                                            |                                                     | 4.190507623 | 8.423543468 | 10.59156579 | 0.84192959  | 0.954926883 |
| Minor_Salivary_Gland                  | HLA-DRB5                            | "major histocompatibility complex, class II, DR beta 5 [Source:HGNC Symbol;Acc:HGNC:4953]"              |                                                            |                                                     | 4.190507623 | 8.423543468 | 10.59156579 | 0.84192959  | 0.954926883 |
| 6:32569056                            | Atherosclerosis Multiple_sclerosis  | "Pain,_not_elsewhere_classified"                                                                        |                                                            |                                                     | 4.190507623 | 8.423543468 | 10.59156579 | 0.84192959  | 0.954926883 |
| Small_Intestine_Terminal_Ileum        | HLA-DRB9                            | "major histocompatibility complex, class II, DR beta 9 (pseudogene) [Source:HGNC Symbol;Acc:HGNC:4957]" |                                                            |                                                     | 4.190507623 | 8.423543468 | 10.59156579 | 0.84192959  | 0.954926883 |
| 6:32569056                            | Atherosclerosis Parkinson's_disease | "Pain,_not_elsewhere_classified"                                                                        |                                                            |                                                     | 4.190507623 | 8.423543468 | 10.59156579 | 0.84192959  | 0.954926883 |
| Brain_Amygdala                        | HLA-DRB5                            | "major histocompatibility complex, class II, DR beta 5 [Source:HGNC Symbol;Acc:HGNC:4953]"              |                                                            |                                                     | 4.190507623 | 8.423543468 | 10.59156579 | 0.84192959  | 0.954926883 |
| 6:32569056                            | Atherosclerosis Parkinson's_disease | "Pain,_not_elsewhere_classified"                                                                        |                                                            |                                                     | 4.190507623 | 8.423543468 | 10.59156579 | 0.84192959  | 0.954926883 |

|                                       |                                                |                                                                                                         |                                                                                                         |             |             |             |             |                   |             |
|---------------------------------------|------------------------------------------------|---------------------------------------------------------------------------------------------------------|---------------------------------------------------------------------------------------------------------|-------------|-------------|-------------|-------------|-------------------|-------------|
| Brain_Cerebellar_Hemisphere           | HLA-DRB5                                       | "major histocompatibility complex, class II, DR beta 5 [Source:HGNC Symbol;Acc:HGNC:4953]"              |                                                                                                         |             |             |             |             |                   |             |
| 6:32569056                            | Atherosclerosis                                | Parkinson's_disease                                                                                     | 14.16469                                                                                                | 3.195718099 | 15.09680608 | 0.993753001 | 0.925473764 | ENSG00000198502.5 |             |
| Brain_Frontal_Cortex_BA9              | HLA-DRB5                                       | "major histocompatibility complex, class II, DR beta 5 [Source:HGNC Symbol;Acc:HGNC:4953]"              |                                                                                                         |             |             |             |             |                   |             |
| 6:32569056                            | Atherosclerosis                                | Parkinson's_disease                                                                                     | 14.16469                                                                                                | 3.195718099 | 15.09680608 | 0.993556143 | 0.93200743  | ENSG00000198502.5 |             |
| Brain_Hypothalamus                    | HLA-DRB5                                       | "major histocompatibility complex, class II, DR beta 5 [Source:HGNC Symbol;Acc:HGNC:4953]"              |                                                                                                         |             |             |             |             |                   |             |
| 6:32569056                            | Atherosclerosis                                | Parkinson's_disease                                                                                     | 14.16469                                                                                                | 3.195718099 | 15.09680608 | 0.95324567  | 0.91041452  | ENSG00000198502.5 |             |
| Brain_Nucleus_accumbens_basal_ganglia | HLA-DRB5                                       | "major histocompatibility complex, class II, DR beta 5 [Source:HGNC Symbol;Acc:HGNC:4953]"              |                                                                                                         |             |             |             |             |                   |             |
| 6:32569056                            | Atherosclerosis                                | Parkinson's_disease                                                                                     | 14.16469                                                                                                | 3.195718099 | 15.09680608 | 0.828362689 | 0.938483832 | ENSG00000198502.5 |             |
| Brain_Putamen_basal_ganglia           | HLA-DRB5                                       | "major histocompatibility complex, class II, DR beta 5 [Source:HGNC Symbol;Acc:HGNC:4953]"              |                                                                                                         |             |             |             |             |                   |             |
| 6:32569056                            | Atherosclerosis                                | Parkinson's_disease                                                                                     | 14.16469                                                                                                | 3.195718099 | 15.09680608 | 0.83341672  | 0.852921616 | ENSG00000198502.5 |             |
| Brain_Spinal_cord_cervical_c-1        | HLA-DRB5                                       | "major histocompatibility complex, class II, DR beta 5 [Source:HGNC Symbol;Acc:HGNC:4953]"              |                                                                                                         |             |             |             |             |                   |             |
| 6:32569056                            | Atherosclerosis                                | Parkinson's_disease                                                                                     | 14.16469                                                                                                | 3.195718099 | 15.09680608 | 0.987989749 | 0.899160729 | ENSG00000198502.5 |             |
| Brain_Substantia_nigra                | HLA-DRB5                                       | "major histocompatibility complex, class II, DR beta 5 [Source:HGNC Symbol;Acc:HGNC:4953]"              |                                                                                                         |             |             |             |             |                   |             |
| 6:32569056                            | Atherosclerosis                                | Parkinson's_disease                                                                                     | 14.16469                                                                                                | 3.195718099 | 15.09680608 | 0.999072084 | 0.903406323 | ENSG00000196301.3 |             |
| Cells_EBV-transformed_lymphocytes     | HLA-DRB9                                       | "major histocompatibility complex, class II, DR beta 9 [Source:HGNC Symbol;Acc:HGNC:4957]"              |                                                                                                         |             |             |             |             |                   |             |
| 6:32569056                            | Atherosclerosis                                | Parkinson's_disease                                                                                     | 14.16469                                                                                                | 3.195718099 | 15.09680608 | 0.868254414 | 0.851693597 | ENSG00000198502.5 |             |
| Minor_Salivary_Gland                  | HLA-DRB5                                       | "major histocompatibility complex, class II, DR beta 5 [Source:HGNC Symbol;Acc:HGNC:4953]"              |                                                                                                         |             |             |             |             |                   |             |
| 6:32569056                            | Atherosclerosis                                | Parkinson's_disease                                                                                     | 14.16469                                                                                                | 3.195718099 | 15.09680608 | 0.997601126 | 0.909244084 | ENSG00000196301.3 |             |
| Small_Intestine_Terminal_Ileum        | HLA-DRB9                                       | "major histocompatibility complex, class II, DR beta 9 (pseudogene) [Source:HGNC Symbol;Acc:HGNC:4957]" |                                                                                                         |             |             |             |             |                   |             |
| 6:32569056                            | Occlusion_and_stenosis_of_precerebral_arteries | Multiple_sclerosis                                                                                      |                                                                                                         |             | 6.355169639 | 5.912573543 | 10.40036396 | 0.991744769       | 0.989040726 |
| ENSG00000198502.5                     | Brain_Frontal_Cortex_BA9                       | HLA-DRB5                                                                                                | "major histocompatibility complex, class II, DR beta 5 [Source:HGNC Symbol;Acc:HGNC:4953]"              |             |             |             |             |                   |             |
| 6:32569056                            | Occlusion_and_stenosis_of_precerebral_arteries | Multiple_sclerosis                                                                                      |                                                                                                         |             | 6.355169639 | 5.912573543 | 10.40036396 | 0.991493615       | 0.950922155 |
| ENSG00000198502.5                     | Brain_Hypothalamus                             | HLA-DRB5                                                                                                | "major histocompatibility complex, class II, DR beta 5 [Source:HGNC Symbol;Acc:HGNC:4953]"              |             |             |             |             |                   |             |
| 6:32569056                            | Occlusion_and_stenosis_of_precerebral_arteries | Multiple_sclerosis                                                                                      |                                                                                                         |             | 6.355169639 | 5.912573543 | 10.40036396 | 0.94083282        | 0.990015681 |
| ENSG00000198502.5                     | Brain_Nucleus_accumbens_basal_ganglia          | HLA-DRB5                                                                                                | "major histocompatibility complex, class II, DR beta 5 [Source:HGNC Symbol;Acc:HGNC:4953]"              |             |             |             |             |                   |             |
| 6:32569056                            | Occlusion_and_stenosis_of_precerebral_arteries | Multiple_sclerosis                                                                                      |                                                                                                         |             | 6.355169639 | 5.912573543 | 10.40036396 | 0.801819555       | 0.996186168 |
| ENSG00000198502.5                     | Brain_Spinal_cord_cervical_c-1                 | HLA-DRB5                                                                                                | "major histocompatibility complex, class II, DR beta 5 [Source:HGNC Symbol;Acc:HGNC:4953]"              |             |             |             |             |                   |             |
| 6:32569056                            | Occlusion_and_stenosis_of_precerebral_arteries | Multiple_sclerosis                                                                                      |                                                                                                         |             | 6.355169639 | 5.912573543 | 10.40036396 | 0.984454766       | 0.956803101 |
| ENSG00000198502.5                     | Brain_Substantia_nigra                         | HLA-DRB5                                                                                                | "major histocompatibility complex, class II, DR beta 5 [Source:HGNC Symbol;Acc:HGNC:4953]"              |             |             |             |             |                   |             |
| 6:32569056                            | Occlusion_and_stenosis_of_precerebral_arteries | Multiple_sclerosis                                                                                      |                                                                                                         |             | 6.355169639 | 5.912573543 | 10.40036396 | 0.842420158       | 0.976504096 |
| ENSG00000198502.5                     | Minor_Salivary_Gland                           | HLA-DRB5                                                                                                | "major histocompatibility complex, class II, DR beta 5 [Source:HGNC Symbol;Acc:HGNC:4953]"              |             |             |             |             |                   |             |
| 6:32569056                            | Occlusion_and_stenosis_of_precerebral_arteries | Multiple_sclerosis                                                                                      |                                                                                                         |             | 6.355169639 | 5.912573543 | 10.40036396 | 0.996655776       | 0.933251555 |
| ENSG00000196301.3                     | Small_Intestine_Terminal_Ileum                 | HLA-DRB9                                                                                                | "major histocompatibility complex, class II, DR beta 9 (pseudogene) [Source:HGNC Symbol;Acc:HGNC:4957]" |             |             |             |             |                   |             |
| 6:32569056                            | Other_peripheral_vascular_disease              | Multiple_sclerosis                                                                                      |                                                                                                         |             | 6.355169639 | 7.441891698 | 11.78694757 | 0.889938544       | 0.989040726 |
| ENSG00000198502.5                     | Brain_Frontal_Cortex_BA9                       | HLA-DRB5                                                                                                | "major histocompatibility complex, class II, DR beta 5 [Source:HGNC Symbol;Acc:HGNC:4953]"              |             |             |             |             |                   |             |
| 6:32569056                            | Other_peripheral_vascular_disease              | Multiple_sclerosis                                                                                      |                                                                                                         |             | 6.355169639 | 7.441891698 | 11.78694757 | 0.887193088       | 0.950922155 |
| ENSG00000198502.5                     | Brain_Hypothalamus                             | HLA-DRB5                                                                                                | "major histocompatibility complex, class II, DR beta 5 [Source:HGNC Symbol;Acc:HGNC:4953]"              |             |             |             |             |                   |             |
| 6:32569056                            | Other_peripheral_vascular_disease              | Multiple_sclerosis                                                                                      |                                                                                                         |             | 6.355169639 | 7.441891698 | 11.78694757 | 0.837386863       | 0.956803101 |
| ENSG00000198502.5                     | Brain_Substantia_nigra                         | HLA-DRB5                                                                                                | "major histocompatibility complex, class II, DR beta 5 [Source:HGNC Symbol;Acc:HGNC:4953]"              |             |             |             |             |                   |             |
| 6:32569056                            | Other_peripheral_vascular_disease              | Multiple_sclerosis                                                                                      |                                                                                                         |             | 6.355169639 | 7.441891698 | 11.78694757 | 0.946559347       | 0.933251555 |
| ENSG00000196301.3                     | Small_Intestine_Terminal_Ileum                 | HLA-DRB9                                                                                                | "major histocompatibility complex, class II, DR beta 9 (pseudogene) [Source:HGNC Symbol;Acc:HGNC:4957]" |             |             |             |             |                   |             |
